# Supplementary material for: Venom Down Under: Dynamic Evolution of Australian Elapid Snake Toxins
Source: MDPI journal article supplement (doi:10.3390/toxins5122621), 2013-12-18
Supplement: s1 [file s1]

**Supplementary Table 1.** Molecular evolution of Australian elapid 3FTx

|                             |                | SLAC <sup>a</sup> | FEL <sup>b</sup> | REL <sup>c</sup> | FUBAR <sup>d</sup> | Integrative analyses               | MEME Sites <sup>e</sup> | BSR <sup>f</sup> | PAML <sup>g</sup> |         |
|-----------------------------|----------------|-------------------|------------------|------------------|--------------------|------------------------------------|-------------------------|------------------|-------------------|---------|
|                             |                |                   |                  |                  |                    | SLAC + FEL + REL +<br>MEME + FUBAR |                         |                  | M8                | M2a     |
| <i>Acanthophis wellsi</i>   |                |                   |                  |                  |                    |                                    |                         |                  |                   |         |
|                             | $\omega > 1^h$ | 0                 | 0                | 17               | 8                  | 17                                 |                         |                  | 8                 | 3       |
| Type II                     | $\omega < 1^i$ | 0                 | 2                | 0                | 1                  | 2                                  | 2                       | 2                | (3+5)             | (2+1)   |
|                             | $\omega =$     | 1.47              | –                | dN>>dS           | –                  | –                                  |                         |                  | 1.76              | 1.76    |
| <i>Brachyurophis roperi</i> |                |                   |                  |                  |                    |                                    |                         |                  |                   |         |
|                             | $\omega > 1^h$ | 0                 | 0                | 10               | 12                 | 12                                 |                         |                  | 25                | 25      |
| Type I                      | $\omega < 1^i$ | 0                 | 1                | 1                | 1                  | 1                                  | 0                       | 2                | (13+12)           | (12+13) |
|                             | $\omega =$     | 14.12             | –                | dN>>dS           | –                  | –                                  |                         |                  | 18.95             | 18.95   |
|                             | $\omega > 1^h$ | 0                 | 0                | 2                | 12                 | 13                                 |                         |                  | 17                | 16      |
| Type II                     | $\omega < 1^i$ | 0                 | 2                | 3                | 2                  | 4                                  | 2                       | 2                | (13+4)            | (11+5)  |
|                             | $\omega =$     | 2.42              | –                | dN>>dS           | –                  | –                                  |                         |                  | 3.52              | 3.54    |
| <i>Cacophis squamulosus</i> |                |                   |                  |                  |                    |                                    |                         |                  |                   |         |
|                             | $\omega > 1^h$ | 0                 | 0                | 2                | 1                  |                                    |                         |                  | 3                 | 3       |
| Type I                      | $\omega < 1^i$ | 0                 | 1                | 3                | 1                  |                                    |                         | 1                | (0+3)             | (0+3)   |
|                             | $\omega =$     | 1.20              | –                | dN>>dS           | –                  | –                                  |                         |                  | 2.51              | 2.50    |
| <i>Drysdalia coronoides</i> |                |                   |                  |                  |                    |                                    |                         |                  |                   |         |
|                             | $\omega > 1^h$ | 0                 | 0                | 1                | 2                  | 3                                  |                         |                  | 10                | 10      |
| Type I                      | $\omega < 1^i$ | 0                 | 0                | 0                | 0                  | 0                                  | 0                       | 2                | (6+4)             | (6+4)   |
|                             | $\omega =$     | 1.21              | –                | 1.38             | –                  | –                                  |                         |                  | 4.45              | 4.46    |
|                             | $\omega > 1^h$ | 0                 |                  | 25               | 9                  | 25                                 |                         |                  | 8                 | 7       |
| Type II                     | $\omega < 1^i$ | 0                 |                  | 0                | 1                  | 2                                  | 3                       | 5                | (6+2)             | (6+1)   |
|                             | $\omega =$     | 2.97              | –                | dN>>dS           | –                  | –                                  |                         |                  | 2.79              | 2.37    |
| <i>Echiopsis curta</i>      |                |                   |                  |                  |                    |                                    |                         |                  |                   |         |
|                             | $\omega > 1^h$ | 0                 | 0                | 2                | 7                  | 8                                  |                         |                  | 6                 | 3       |
| Type II                     | $\omega < 1^i$ | 0                 | 2                | 0                | 2                  | 2                                  | 0                       | 3                | (2+4)             | (1+2)   |
|                             | $\omega =$     | 4.92              | –                | dN>>dS           | –                  | –                                  |                         |                  | 2.43              | 2.43    |
| <i>Furina ornata</i>        |                |                   |                  |                  |                    |                                    |                         |                  |                   |         |
|                             | $\omega > 1^h$ | 0                 | 0                | 5                | 3                  | 5                                  |                         |                  | 6                 | 6       |
| Type II                     | $\omega < 1^i$ | 2                 | 1                | 0                | 1                  | 2                                  | 0                       | 0                | (5+1)             | (3+3)   |
|                             | $\omega =$     | 1.16              | –                | 3.07             | –                  | –                                  |                         |                  | 1.63              | 1.67    |
|                             | $\omega > 1^h$ | 0                 | 0                | 4                | 5                  | 6                                  |                         |                  | 9                 | 7       |
| Type III                    | $\omega < 1^i$ | 0                 | 1                | 0                | 1                  | 1                                  | 2                       | 3                | (3+6)             | (1+6)   |
|                             | $\omega =$     | 1.28              | –                | 20.7             | –                  | –                                  |                         |                  | 1.81              | 1.82    |

|                            |              | SLAC <sup>a</sup> | FEL <sup>b</sup> | REL <sup>c</sup> | FUBAR <sup>d</sup> | Integrative analyses | MEME<br>Sites <sup>e</sup> | BSR <sup>f</sup> | PAML <sup>g</sup> |        |
|----------------------------|--------------|-------------------|------------------|------------------|--------------------|----------------------|----------------------------|------------------|-------------------|--------|
| <i>Hemiaspis signata</i>   |              |                   |                  |                  |                    |                      |                            |                  |                   |        |
| Type I                     | $\omega>1^h$ | 0                 | 0                | 3                | 2                  | 3                    |                            |                  | 0                 | 0      |
|                            | $\omega<1^i$ | 0                 | 1                | 0                | 4                  | 4                    | 0                          | 0                |                   |        |
|                            | $\omega=$    | 1.19              | —                | 1.33             | —                  | —                    |                            |                  | 1.18              | 1.18   |
| Type II                    | $\omega>1^h$ | 0                 | 0                | 3                | 12                 | 14                   |                            |                  | 14                | 13     |
|                            | $\omega<1^i$ | 0                 | 2                | 4                | 2                  | 4                    | 2                          | 5                | (10+4)            | (9+4)  |
|                            | $\omega=$    | 2.74              | —                | dN>>dS           | —                  | —                    |                            |                  | 4.26              | 4.26   |
| <i>Parasuta nigriceps</i>  |              |                   |                  |                  |                    |                      |                            |                  |                   |        |
| Type I                     | $\omega>1^h$ | 0                 | 0                | 5                | 2                  | 5                    |                            |                  | 5                 | 3      |
|                            | $\omega<1^i$ | 0                 | 2                | 0                | 1                  | 2                    | 0                          | 1                | (1+4)             | (1+2)  |
|                            | $\omega=$    | 1.78              | —                | dN>>dS           | —                  | —                    |                            |                  | 3.0               | 3.0    |
| Type II                    | $\omega>1^h$ | 0                 | 0                | 1                | 2                  | 3                    |                            |                  | 8                 | 5      |
|                            | $\omega<1^i$ | 0                 | 3                | 0                | 2                  | 3                    | 1                          | 1                | (2+6)             | (2+3)  |
|                            | $\omega=$    | 1.27              | —                | 2.59             | —                  | —                    |                            |                  | 5.97              | 5.97   |
| <i>Pseudonaja modesta</i>  |              |                   |                  |                  |                    |                      |                            |                  |                   |        |
| Type II                    | $\omega>1^h$ | 0                 | 4                | 0                | 14                 | 15                   |                            |                  | 18                | 13     |
|                            | $\omega<1^i$ | 2                 | 3                | 6                | 21                 | 7                    | 3                          | 6                | (13+5)            | (11+2) |
|                            | $\omega=$    | 2.65              | —                | dN>>dS           | —                  | —                    |                            |                  | 3.28              | 2.73   |
| Type III                   | $\omega>1^h$ | 2                 | 10               | 19               | 25                 | 27                   |                            |                  | 25                | 22     |
|                            | $\omega<1^i$ | 2                 | 4                | 24               | 3                  | 24                   | 16                         | 10               | (22+3)            | (18+4) |
|                            | $\omega=$    | 2.69              | —                | 11.22            | —                  | —                    |                            |                  | 2.82              | 2.78   |
| <i>Suta nigriceps</i>      |              |                   |                  |                  |                    |                      |                            |                  |                   |        |
| Type I                     | $\omega>1^h$ | 0                 | 0                | 5                | 2                  | 5                    |                            |                  | 5                 | 3      |
|                            | $\omega<1^i$ | 0                 | 2                | 0                | 1                  | 2                    | 0                          | 1                | (1+4)             | (1+2)  |
|                            | $\omega=$    | 1.78              | —                | dN>>dS           | —                  | —                    |                            |                  | 3.0               | 3.0    |
| Type II                    | $\omega>1^h$ | 0                 | 0                | 1                | 2                  | 3                    |                            |                  | 8                 | 5      |
|                            | $\omega<1^i$ | 0                 | 3                | 0                | 2                  | 3                    | 1                          | 1                | (2+6)             | (2+3)  |
|                            | $\omega=$    | 1.27              | —                | 2.59             | —                  | —                    |                            |                  | 5.97              | 5.97   |
| <i>Vermicella annulata</i> |              |                   |                  |                  |                    |                      |                            |                  |                   |        |
| Type I                     | $\omega>1^h$ | 0                 | 0                | 0                | 0                  | 1                    |                            |                  | 0                 | 0      |
|                            | $\omega<1^i$ | 0                 | 1                | 1                | 1                  | 4                    | 1                          | 1                |                   |        |
|                            | $\omega=$    | 1.05              | —                | 16.17            | —                  | —                    |                            |                  | 0.63              | 0.63   |
| Type II                    | $\omega>1^h$ | 0                 | 0                | 6                | 5                  | 9                    |                            |                  | 14                | 11     |
|                            | $\omega<1^i$ | 0                 | 1                | 0                | 2                  | 2                    | 1                          | 3                | (6+8)             | (5+6)  |
|                            | $\omega=$    | 1.66              | —                | 2.99             | —                  | —                    |                            |                  | 3.89              | 3.89   |
| Type III                   | $\omega>1^h$ | 0                 | 3                | 4                | 13                 | 13                   |                            |                  | 20                | 19     |
|                            | $\omega<1^i$ | 0                 | 2                | 2                | 3                  | 3                    | 3                          | 7                | (18+2)            | (14+5) |
|                            | $\omega=$    | 3.02              | —                | dN>>dS           | —                  | —                    |                            |                  | 6.84              | 5.66   |

## Legend:

**a:** Single Likelihood Ancestor Counting

**b:** Fixed-effects likelihood

**c:** Random-effects likelihood

**d:** Fast Unconstrained Bayesian AppRoximation

**e:** Sites detected as experiencing episodic diversifying selection (0.05 significance) by the Mixed Effects Model Evolution

**f:** #of branches detected as episodically diversifying by Branch-site REL

**g:** Positively-selected sites detected using the Bayes Empirical Bayes approach implemented in M8 and M2a. Sites detected at 0.99 and 0.95 significance are indicated in the parenthesis

**h:** Number of positively selected sites at 0.05 significance (for SLAC, FEL) or 50 Bayes factor (for REL) / number of sites under pervasive diversifying selection at the posterior probability  $\geq 0.9$  (FUBAR)

**i:** Number of negatively selected sites at 0.05 significance (for SLAC, FEL) or 50 Bayes factor (for REL) / number of sites under pervasive purifying selection at the posterior probability  $\geq 0.9$  (FUBAR)

**dN>>dS:** Extremely large dN, as dS is nearly 0

**$\omega$ :** mean dN/dS
