# Supplementary material for: Venom Down Under: Dynamic Evolution of Australian Elapid Snake Toxins
Source: MDPI journal article supplement (doi:10.3390/toxins5122621), 2013-12-18
Supplement: s1 [file s1]

Supplementary Table 2

| Species                          | # of sequences | total # of bases | average sequence length | average sequence quality | % GC  |
|----------------------------------|----------------|------------------|-------------------------|--------------------------|-------|
| <i>Acanthophis wellsi</i>        | 55,372         | 15,197,836       | 274                     | 30.71                    | 50.34 |
| <i>Brachyuropis roperi</i>       | 55,694         | 15,892,775       | 285                     | 30.42                    | 45.89 |
| <i>Cacophis squamulosus</i>      | 38,985         | 14,068,260       | 360                     | 32.21                    | 48.73 |
| <i>Denisonia devisii</i>         | 28,275         | 8,059,988        | 285                     | 30.52                    | 49.75 |
| <i>Echiopsis curta</i>           | 59,740         | 17,191,872       | 287                     | 30.40                    | 49.76 |
| <i>Furina ornate</i>             | 46,190         | 13,117,708       | 283                     | 30.39                    | 49.19 |
| <i>Hemiaspis signata</i>         | 48,904         | 18,095,514       | 370                     | 32.13                    | 57.09 |
| <i>Hoplocephalus bungaroides</i> | 47,675         | 13,050,675       | 273                     | 32.37                    | 56.52 |
| <i>Pseudonaja modesta</i>        | 51,984         | 14,959,557       | 287                     | 30.51                    | 48.99 |
| <i>Suta fasciata</i>             | 90,963         | 26,698,687       | 293                     | 30.35                    | 47.26 |
| <i>Vermicella annulata</i>       | 49,960         | 14,653,238       | 293                     | 32.71                    | 55.39 |

Supplementary Table 3

| Species                          | # of contigs | Assembled bases | Average bases per contig |
|----------------------------------|--------------|-----------------|--------------------------|
| <i>Acanthophis wellsi</i>        | 2,657        | 1,284,940       | 484                      |
| <i>Brachyuropis semifasciata</i> | 5,493        | 2,794,630       | 509                      |
| <i>Denisonia devisi</i>          | 1,572        | 774,029         | 492                      |
| <i>Echiopsis curta</i>           | 2,998        | 1,534,906       | 512                      |
| <i>Furina ornata</i>             | 3,137        | 1,555,634       | 496                      |
| <i>Cacophis squamulosus</i>      | 3,015        | 1,638,379       | 543                      |
| <i>Hemiaspis signata</i>         | 1,431        | 728,481         | 509                      |
| <i>Hoplocephalus bungaroides</i> | 3,939        | 2,150,604       | 546                      |
| <i>Pseudonaja modesta</i>        | 3,335        | 1,708,478       | 512                      |
| <i>Suta fasciata</i>             | 6,180        | 3,391,483       | 549                      |
| <i>Vermicella annulata</i>       | 3,711        | 1,842,636       | 497                      |
