# Supplementary material for: Venom Down Under: Dynamic Evolution of Australian Elapid Snake Toxins
Source: MDPI journal article supplement (doi:10.3390/toxins5122621), 2013-12-18
Supplement: s1 [file s1]

Parameter settings seen for:

Sanger data (also common parameters), 454 data

Used parameter settings:

General (-GE):

|                                         |   |           |
|-----------------------------------------|---|-----------|
| Project name in (proin)                 | : | mira      |
| Project name out (proout)               | : | mira      |
| Number of threads (not)                 | : | 2         |
| Automatic memory management (amm)       | : | yes       |
| Keep percent memory free (kpmf)         | : | 15        |
| Max. process size (mps)                 | : | 0         |
| EST SNP pipeline step (esps)            | : | 0         |
| Use template information (uti)          | : | [san] yes |
|                                         |   | [454] yes |
| Template insert size minimum (tismin)   | : | [san] -1  |
|                                         |   | [454] -1  |
| Template insert size maximum (tismax)   | : | [san] -1  |
|                                         |   | [454] -1  |
| Template partner build direction (tpbd) | : | [san] -1  |
|                                         |   | [454] -1  |
| Colour reads by hash frequency (crhf)   | : | no        |

Load reads options (-LR):

|                          |   |             |
|--------------------------|---|-------------|
| Load sequence data (lsd) | : | [san] no    |
|                          |   | [454] yes   |
| File type (ft)           | : | [san] fasta |
|                          |   | [454] fastq |

|                                         |   |                |
|-----------------------------------------|---|----------------|
| External quality (eq)                   | : | from SCF (scf) |
| Ext. qual. override (eqo)               | : | no             |
| Discard reads on e.q. error (droeqe)    | : | no             |
| Solexa scores in qual file (ssiqf)      | : | no             |
| FASTQ qual offset (fqo)                 | : | [san] 0        |
|                                         |   | [454] 0        |
| Wants quality file (wqf)                | : | [san] yes      |
|                                         |   | [454] yes      |
| Read naming scheme (rns)                | : | [san] Sanger   |
| Institute (sanger)                      |   |                |
|                                         |   | [454]          |
| forward/reverse (fr)                    |   |                |
| Merge with XML trace info (mxti)        | : | [san] no       |
|                                         |   | [454] yes      |
| Filecheck only (fo)                     | : | no             |
| Assembly options (-AS):                 |   |                |
| Number of passes (nop)                  | : | 5              |
| Skim each pass (sep)                    | : | yes            |
| Maximum number of RMB break loops (rbl) | : | 3              |
| Maximum contigs per pass (mcpp)         | : | 0              |
| Minimum read length (mrl)               | : | [san] 80       |
|                                         |   | [454] 40       |

|                                      |   |       |     |
|--------------------------------------|---|-------|-----|
| Minimum reads per contig (mrpc)      | : | [san] | 2   |
|                                      |   | [454] | 1   |
| Base default quality (bdq)           | : | [san] | 10  |
|                                      |   | [454] | 10  |
| Enforce presence of qualities (epoq) | : | [san] | yes |
|                                      |   | [454] | yes |
| Automatic repeat detection (ard)     | : |       | no  |
| Coverage threshold (ardct)           | : | [san] | 2   |
|                                      |   | [454] | 2   |
| Minimum length (ardml)               | : | [san] | 400 |
|                                      |   | [454] | 200 |
| Grace length (ardgl)                 | : | [san] | 40  |
|                                      |   | [454] | 20  |
| Use uniform read distribution (urd)  | : |       | no  |
| Start in pass (urdsip)               | : |       | 4   |
| Cutoff multiplier (urdcn)            | : | [san] | 1.5 |
|                                      |   | [454] | 1.5 |
| Keep long repeats separated (klrs)   | : |       | no  |
| Spoiler detection (sd)               | : |       | no  |
| Last pass only (sdlpo)               | : |       | yes |
| Use genomic pathfinder (ugpf)        | : |       | no  |
| Use emergency search stop (uess)     | : |       | yes |
| ESS partner depth (esspd)            | : |       | 500 |

|                                    |        |
|------------------------------------|--------|
| Use emergency blacklist (uebl)     | : yes  |
| Use max. contig build time (umcbt) | : yes  |
| Build time in seconds (bts)        | : 3600 |

#### Strain and backbone options (-SB):

|                                      |                   |
|--------------------------------------|-------------------|
| Load straindata (lsd)                | : no              |
| Assign default strain (ads)          | : [san] no        |
|                                      | [454] no          |
| Default strain name (dsn)            | : [san] StrainX   |
|                                      | [454] StrainX     |
| Load backbone (lb)                   | : no              |
| Start backbone usage in pass (sbuip) | : 3               |
| Backbone file type (bft)             | : fasta           |
| Backbone base quality (bbq)          | : 30              |
| Backbone strain name (bsn)           | : ReferenceStrain |
| Force for all (bsnffa)               | : no              |
| Backbone rail from strain (brfs)     | :                 |
| Backbone rail length (brl)           | : 0               |
| Backbone rail overlap (bro)          | : 0               |
| Also build newcontigs (abnc)         | : yes             |

#### Dataprocessing options (-DP):

|                                     |             |
|-------------------------------------|-------------|
| Use read extensions (ure)           | : [san] yes |
|                                     | [454] no    |
| Read extension window length (rewl) | : [san] 30  |
|                                     | [454] 15    |
| Read extension w. maxerrors (rewme) | : [san] 2   |

|                                |   |       |   |
|--------------------------------|---|-------|---|
|                                |   | [454] | 2 |
| First extension in pass (feip) | : | [san] | 0 |
|                                |   | [454] | 0 |
| Last extension in pass (leip)  | : | [san] | 0 |
|                                |   | [454] | 0 |

#### Clipping options (-CL):

|                                               |   |       |     |
|-----------------------------------------------|---|-------|-----|
| Merge with SSAHA2/SMALT vector screen (msvs)  | : | [san] | no  |
|                                               |   | [454] | no  |
| Gap size (msvsgs)                             | : | [san] | 10  |
|                                               |   | [454] | 8   |
| Max front gap (msvsmfg)                       | : | [san] | 60  |
|                                               |   | [454] | 8   |
| Max end gap (msvsmeg)                         | : | [san] | 120 |
|                                               |   | [454] | 12  |
| Strict front clip (msvssfc)                   | : | [san] | 0   |
|                                               |   | [454] | 0   |
| Strict end clip (msvssec)                     | : | [san] | 0   |
|                                               |   | [454] | 0   |
| Possible vector leftover clip (pvlc)          | : | [san] | yes |
|                                               |   | [454] | no  |
| maximum len allowed (pvcmla)                  | : | [san] | 18  |
|                                               |   | [454] | 18  |
| Min qual. threshold for entire read (mqtferr) | : | [san] | 0   |
|                                               |   | [454] | 0   |
| Number of bases (mqtferrnob)                  | : | [san] | 0   |
|                                               |   | [454] | 0   |

|                                 |   |       |     |
|---------------------------------|---|-------|-----|
| Quality clip (qc)               | : | [san] | no  |
|                                 |   | [454] | no  |
| Minimum quality (qcmq)          | : | [san] | 20  |
|                                 |   | [454] | 20  |
| Window length (qcwl)            | : | [san] | 30  |
|                                 |   | [454] | 30  |
| Bad stretch quality clip (bsqc) | : | [san] | yes |
|                                 |   | [454] | no  |
| Minimum quality (bsqcmq)        | : | [san] | 20  |
|                                 |   | [454] | 5   |
| Window length (bsqcwl)          | : | [san] | 30  |
|                                 |   | [454] | 20  |
| Masked bases clip (mbc)         | : | [san] | yes |
|                                 |   | [454] | yes |
| Gap size (mbcgs)                | : | [san] | 20  |
|                                 |   | [454] | 5   |
| Max front gap (mbcmfg)          | : | [san] | 40  |
|                                 |   | [454] | 12  |
| Max end gap (mbcmeg)            | : | [san] | 60  |
|                                 |   | [454] | 12  |
| Lower case clip (lcc)           | : | [san] | no  |
|                                 |   | [454] | yes |
| Clip poly A/T at ends (cpat)    | : | [san] | no  |
|                                 |   | [454] | yes |
| Keep poly-a signal (cpkps)      | : | [san] | no  |
|                                 |   | [454] | no  |
| Minimum signal length (cpmsl)   | : | [san] | 12  |

|                                  |   |       |       |
|----------------------------------|---|-------|-------|
|                                  |   | [454] | 12    |
| Max errors allowed (cpmea)       | : | [san] | 1     |
|                                  |   | [454] | 1     |
| Max gap from ends (cpmgfe)       | : | [san] | 9     |
|                                  |   | [454] | 20000 |
| Clip 3 prime polybase (c3pp)     | : | [san] | no    |
|                                  |   | [454] | no    |
| Minimum signal length (c3ppmsl)  | : | [san] | 12    |
|                                  |   | [454] | 12    |
| Max errors allowed (c3ppmea)     | : | [san] | 2     |
|                                  |   | [454] | 2     |
| Max gap from ends (c3ppmgfe)     | : | [san] | 9     |
|                                  |   | [454] | 9     |
| Clip known adaptors right (ckar) | : | [san] | no    |
|                                  |   | [454] | yes   |
| Ensure minimum left clip (emlc)  | : | [san] | yes   |
|                                  |   | [454] | no    |
| Minimum left clip req. (mlcr)    | : | [san] | 25    |
|                                  |   | [454] | 4     |
| Set minimum left clip to (smlc)  | : | [san] | 30    |
|                                  |   | [454] | 4     |
| Ensure minimum right clip (emrc) | : | [san] | no    |
|                                  |   | [454] | no    |
| Minimum right clip req. (mrcr)   | : | [san] | 10    |
|                                  |   | [454] | 10    |
| Set minimum right clip to (smrc) | : | [san] | 20    |
|                                  |   | [454] | 15    |

|                                           |       |
|-------------------------------------------|-------|
| Apply SKIM chimera detection clip (ascdc) | : no  |
| Apply SKIM junk detection clip (asjdc)    | : no  |
| Propose end clips (pec)                   | : no  |
| Bases per hash (pecbph)                   | : 17  |
| Handle Solexa GGCxG problem (pechsgp)     | : yes |
| Clip bad solexa ends (cbse)               | : yes |

Parameters for SKIM algorithm (-SK):

|                                         |            |
|-----------------------------------------|------------|
| Number of threads (not)                 | : 2        |
| Also compute reverse complements (acrc) | : yes      |
| Bases per hash (bph)                    | : 21       |
| Hash save stepping (hss)                | : 1        |
| Percent required (pr)                   | : [san] 70 |
|                                         | [454] 80   |
| Max hits per read (mhpr)                | : 30       |
| Max megahub ratio (mmhr)                | : 0        |
| SW check on backbones (swcob)           | : no       |
| Freq. est. min normal (fenn)            | : 0.4      |
| Freq. est. max normal (fexn)            | : 1.6      |
| Freq. est. repeat (fer)                 | : 1.9      |



|                                   |            |
|-----------------------------------|------------|
| Freq. est. heavy repeat (fehr)    | : 8        |
| Freq. est. crazy (fecr)           | : 20       |
| Mask nasty repeats (mnr)          | : yes      |
| Nasty repeat ratio (nrr)          | : 100      |
| Repeat level in info file (rliif) | : 6        |
| Max hashes in memory (mhim)       | : 15000000 |
| MemCap: hit reduction (mchr)      | : 2048     |

Pathfinder options (-PF):

|                                        |             |           |
|----------------------------------------|-------------|-----------|
| Use quick rule (uqr)                   | : [san] yes |           |
|                                        |             | [454] yes |
| Quick rule min len 1 (qrml1)           | : [san] 200 |           |
|                                        |             | [454] 80  |
| Quick rule min sim 1 (qrms1)           | : [san] 90  |           |
|                                        |             | [454] 90  |
| Quick rule min len 2 (qrml2)           | : [san] 100 |           |
|                                        |             | [454] 60  |
| Quick rule min sim 2 (qrms2)           | : [san] 95  |           |
|                                        |             | [454] 95  |
| Backbone quick overlap min len (bqoml) | : [san] 150 |           |
|                                        |             | [454] 80  |
| Max. start cache fill time (mscft)     | : 5         |           |

Align parameters for Smith-Waterman align (-AL):

|                            |            |
|----------------------------|------------|
| Bandwidth in percent (bip) | : [san] 20 |
|                            | [454] 20   |

|                                   |   |       |                  |
|-----------------------------------|---|-------|------------------|
| Bandwidth max (bmax)              | : | [san] | 130              |
|                                   |   | [454] | 80               |
| Bandwidth min (bmin)              | : | [san] | 25               |
|                                   |   | [454] | 20               |
| Minimum score (ms)                | : | [san] | 30               |
|                                   |   | [454] | 15               |
| Minimum overlap (mo)              | : | [san] | 17               |
|                                   |   | [454] | 20               |
| Minimum relative score in % (mrs) | : | [san] | 70               |
|                                   |   | [454] | 80               |
| Solexa_hack_max_errors (shme)     | : | [san] | 0                |
|                                   |   | [454] | 0                |
| Extra gap penalty (egp)           | : | [san] | no               |
|                                   |   | [454] | yes              |
| extra gap penalty level (egpl)    | : | [san] | low              |
|                                   |   | [454] | reject_codongaps |
| Max. egp in percent (megpp)       | : | [san] | 100              |
|                                   |   | [454] | 100              |

#### Contig parameters (-CO):

|                                                               |       |       |
|---------------------------------------------------------------|-------|-------|
| Name prefix (np)                                              | :     | mira  |
| Reject on drop in relative alignment score in %<br>(rodirs) : | [san] | 25    |
|                                                               |       | [454] |
| 15                                                            |       |       |
| Mark repeats (mr)                                             | :     | yes   |
| Only in result (mroir)                                        | :     | no    |
| Assume SNP instead of repeats (asir)                          | :     | no    |

|           |                                               |   |           |         |
|-----------|-----------------------------------------------|---|-----------|---------|
| (mrpg)    | Minimum reads per group needed for tagging    | : | [san] 2   |         |
| 4         |                                               |   |           | [454]   |
| (mnq)     | Minimum neighbour quality needed for tagging  | : | [san] 20  |         |
| 20        |                                               |   |           | [454]   |
| (mgqrt)   | Minimum Group Quality needed for RMB Tagging  | : | [san] 30  |         |
| 5         |                                               |   |           | [454] 2 |
| (emea)    | End-read Marking Exclusion Area in bases      | : | [san] 25  |         |
| 10        |                                               |   |           | [454]   |
|           | Set to 1 on clipping PEC (emeas1clpec)        | : | yes       |         |
| (amgb)    | Also mark gap bases                           | : | [san] yes |         |
| no        |                                               |   |           | [454]   |
| (amgbemc) | Also mark gap bases - even multicolumn        | : | [san] yes |         |
| yes       |                                               |   |           | [454]   |
| (amgbnbs) | Also mark gap bases - need both strands       | : | [san] yes |         |
| yes       |                                               |   |           | [454]   |
| (fnicpst) | Force non-IUPAC consensus per sequencing type | : | [san] no  |         |
| no        |                                               |   |           | [454]   |
| (msr)     | Merge short reads                             | : | [san] no  |         |
| no        |                                               |   |           | [454]   |

|          |                    |         |       |
|----------|--------------------|---------|-------|
|          | Keep ends unmerged |         |       |
| (msrkeu) |                    | : [san] | -1    |
|          |                    |         | [454] |
| -1       |                    |         |       |
|          | Gap override ratio |         |       |
| (gor)    |                    | : [san] | 66    |
|          |                    |         | [454] |
| 66       |                    |         |       |

Edit options (-ED):

|                                |         |     |
|--------------------------------|---------|-----|
| Automatic contig editing (ace) | : [san] | no  |
|                                | [454]   | yes |

Sanger only:

|                                        |      |
|----------------------------------------|------|
| Strict editing mode (sem)              | : no |
| Confirmation threshold in percent (ct) | : 50 |

Misc (-MI):

|                                       |        |
|---------------------------------------|--------|
| Stop on NFS (sonfs)                   | : yes  |
| Extended log (el)                     | : no   |
| Large contig size (lcs)               | : 500  |
| Large contig size for stats(lcs4s)    | : 1000 |
| Stop on max read name length (somrn1) | : 40   |

Directories (-DI):

|                                 |                                |
|---------------------------------|--------------------------------|
| Working directory               | :                              |
| When loading EXP files          | :                              |
| When loading SCF files          | :                              |
| Top directory for writing files | : mira_assembly                |
| For writing result files        | : mira_assembly/mira_d_results |

For writing result info files : mira\_assembly/mira\_d\_info  
For writing tmp files : /tmp//mira\_d\_tmp  
Tmp redirected to (trt) : /tmp/  
For writing checkpoint files : mira\_assembly/mira\_d\_chkpt

File names (-FN):

When loading sequences from  
FASTA : [san] mira\_in.sanger.fasta

[454] mira\_in.454.  
fasta

When loading qualities from FASTA  
quality : [san] mira\_in.sanger.fasta.qual

[454] mira\_in.454.  
fasta.qual

When loading sequences from  
FASTQ : [san] mira\_in.sanger.fastq

[454] mira\_in.454.  
fastq

When loading project from CAF : mira\_in.sanger.caf

When loading project from MAF (disabled) : mira\_in.sanger.maf

When loading EXP fofn : mira\_in.sanger.fofn

When loading project from PHD : mira\_in.phd.1

When loading strain data :  
mira\_straindata\_in.txt

When loading XML trace info  
files : [san] mira\_traceinfo\_in.sanger.xml

[454] mira\_tracein  
fo\_in.454.xml

When loading SSAHA2 vector screen results :  
mira\_ssaha2vectorscreen\_in.txt

When loading SMALT vector screen results :  
mira\_smaltvectorscreen\_in.txt

|                                                            |                        |
|------------------------------------------------------------|------------------------|
| When loading backbone from MAF                             | : mira_backbone_in.maf |
| When loading backbone from CAF                             | : mira_backbone_in.caf |
| When loading backbone from GenBank                         | : mira_backbone_in.gbf |
| When loading backbone from GFF3<br>mira_backbone_in.gff3   | :                      |
| When loading backbone from FASTA<br>mira_backbone_in.fasta | :                      |

#### Output files (-OUTPUT/-OUT):

|                                         |             |
|-----------------------------------------|-------------|
| Save simple singlets in project (sssip) | : [san] no  |
|                                         | [454] no    |
| Save tagged singlets in project (stsip) | : [san] yes |
|                                         | [454] yes   |
| Remove rollover tmps (rrot)             | : yes       |
| Remove tmp directory (rtd)              | : no        |

#### Result files:

|                                    |        |       |
|------------------------------------|--------|-------|
| Saved as CAF                       | (orc)  | : yes |
| Saved as MAF                       | (orm)  | : yes |
| Saved as FASTA                     | (orf)  | : yes |
| Saved as GAP4 (directed assembly)  | (org)  | : no  |
| Saved as phrap ACE                 | (ora)  | : yes |
| Saved as GFF3                      | (org3) | : no  |
| Saved as HTML                      | (orh)  | : no  |
| Saved as Transposed Contig Summary | (ors)  | : yes |
| Saved as simple text format        | (ort)  | : no  |

Saved as wiggle (orw) : no

Temporary result files:

Saved as CAF (otc) : yes

Saved as MAF (otm) : no

Saved as FASTA (otf) : no

Saved as GAP4 (directed assembly) (otg) : no

Saved as phrap ACE (ota) : no

Saved as HTML (oth) : no

Saved as Transposed Contig Summary (ots) : no

Saved as simple text format (ott) : no

Extended temporary result files:

Saved as CAF (oetc) : no

Saved as FASTA (oetf) : no

Saved as GAP4 (directed assembly) (oetg) : no

Saved as phrap ACE (oeta) : no

Saved as HTML (oeth) : no

Save also singlets (oetas) : no

Alignment output customisation:

TEXT characters per line (tcpl) : 60

HTML characters per line (hcpl) : 60

TEXT end gap fill character (tegfc) :

HTML end gap fill character (hegfc) :

File / directory output names:

|                  |                                |
|------------------|--------------------------------|
| CAF              | : mira_out.caf                 |
| MAF              | : mira_out.maf                 |
| FASTA            | : mira_out.unpadded.fasta      |
| FASTA quality    | : mira_out.unpadded.fasta.qual |
| FASTA (padded)   | : mira_out.padded.fasta        |
| FASTA qual.(pad) | : mira_out.padded.fasta.qual   |
| GAP4 (directory) | : mira_out.gap4da              |
| ACE              | : mira_out.ace                 |
| HTML             | : mira_out.html                |
| Simple text      | : mira_out.txt                 |
| TCS overview     | : mira_out.tcs                 |
| Wiggle           | : mira_out.wig                 |

---

SK: pr=80-

AL mrs=80

Egp=1

AS:mrpc=1
