# Supplementary material for: Venom Down Under: Dynamic Evolution of Australian Elapid Snake Toxins
Source: MDPI journal article supplement (doi:10.3390/toxins5122621), 2013-12-18
Supplement: s1 [file s1]

## TOXIN TYPES

3FTX = Three finger toxin

ACN = acetylcholinesterase

cystatin

CVF = cobra venom factor

fV = factor V

fX = factor X

KP = kunitz peptide

LP = lectin protein

NGF = nerve growth factor

NP = natriuretic peptide

PLA2 = phospholipase A<sub>2</sub>

SVMP = snake venom metalloprotease

VEGF = vascular endothelial growth factor

WP = waprin peptide

>GAGZ0000000.1|GAGZ01000000 TSA: Acanthophis wellsei, transcriptome shotgun assembly, transcriptome shotgun assembly

>GAGZ01000001 Acanthophis wellsi 3FTx-Aca-18 mRNA sequence  
ATGAAACTCTGCTGCTGACCTTGGTGGTGGTGACAATCCTGTGCCTGGACTTAGGATACACCATGACAT  
GCTTCAAAACACCTTATGTTAAATCCGAGCCTTGTCCACCTGGGGAGAATGTATGCGTTACAAAGACTTG  
GTGTGATGCCTTTTGTAGCATCAGAGGAAAGGTAATCGAACTGGGATGTGCTGCTACTTGCCCTCCAGCG  
GAGCCAAAAAGGATATTAAATGTTGCTCAACAGACAATTGCAACACACATCCGTAA

>GAGZ01000002 Acanthophis wellsi 3FTx-Aca-27 mRNA sequence  
ATGAAACTCTGCTGCTGACCTTGGTGGTGGTGACAATCCTGTGCCTGGACTTAGGTGACAGCGTGATAT  
GCTACCTGGGATATAACAACCTCAGACTTGTCCACCTGGGGAGAATGTATGCTTTACAAGGACTTGGTG  
TGATGCCTTTTGTAGCAGCAGAGGAAAGGTAGTCGAACTGGGATGTGCTGCTACTTGCCCTATACCGAAG  
TCCTATCAGGATGTTAAATGTTGCTCAACAGACAAGTGCAACCCATTTCAGTACGTCCTCGACGGAGGC  
CCTAA

>GAGZ01000003 Acanthophis wellsi 3FTx-Aca-30 mRNA sequence  
ATGAAACTCTGCTGCTGACCTTGGTGGTGGTGACAATCCTGTGCCTGGACTTAGGTGACAGCGTGATAT  
GCTACCTGGGATATAACAACCTCAGACTTGTCCACCTGGGGAGAATGTATGCTTTACAAGGACTTGGTG  
TGATTCCTTTTGTAGCAGCAGAGGAAAGGTAGTCGAACTGGGATGTGCTGCTACTTGCCCTATACCGAAG  
TCCTATCAGGATGTTAAATGTTGCTCAACAGACAAGTGCAACCCATTTCAGTACGTCCTCGACGGAGGC  
CCTAA

>GAGZ01000004 Acanthophis wellsi 3FTx-Aca-53 mRNA sequence  
ATGAAACTCTGCTGCTGACCTTGGTGGTGGTGACAATCGTGTGCCTGGACTTAGGATACACCAAGACAT  
GCTTCAAAACACCTTATGTTAAATCCGAGCCTTGTCCACCTGGGCAGGACCTATGCTATACAAAGACTTG  
GTGTGATGCCTTTTGTAGCATCAGAGGAAAGGTAATCGAACTGGGATGTGCTGCTACTTGCCCTCCAGCG  
GAGCCAAAAAGGATATTAAATGTTGCTCAACAGACAATTGCAACACACATCCGTAA

>GAGZ01000005 Acanthophis wellsi 3FTx-Aca-54 mRNA sequence  
ATGAAACTCTGCTGCTGACCTTGGTGGTGGTGACAATCGTGTGCCTGGACTTAGGATACACCAAGACAT  
GCTTCAAAACACCTTATGTTAAATCCGAGCCTTGTCCACCTGGGCAGGACCTATGCTATACAAAGACTTG  
GTGTGATGCCTTTTGTAGCATCAGAGGAAAGGTAATCGAACTGGGATGTGCTGCTACTTGCCCTCCAGCG  
GAGCCAAAAAGGATATTAAATGTTGCTCAACAGACAATTGCAACACACATCCGTAA

>GAGZ01000006 Acanthophis wellsi 3FTx-Aca-55 mRNA sequence  
ATGAAACTCTGCTGCTGACCTTGGTGGTGGTGACAATCCTGTGCCTGGACGTAGGTGACAGCGTGATAT  
GCTACCTGGGATATAAATTACGCTCAGCCTTGTCCACCTGGGGAGAATGTATGCTTTACAAAGACTTGGTG  
TGATGGTTCGATGTCCCAACTAGGAAAGCGAGTCGAAATGGGATGTGCTGCTACTTGCCCCAAAGTGAAG  
CGCGGTGTGGATATTAAATGTTGCTCAACAGACAAGTGCAACCCATTCATTAGTCCTCGAGGGAAGC  
CCTAA

>GAGZ01000007 Acanthophis wellsi 3FTx-Aca-57 mRNA sequence  
ATGAAACTCTGCTGCTGACCTTGGTGGTGGTGACAATCCTGTGCCTGGACGTAGGTGAAAGCGTGATAT  
GCTACCTGGGATATAACAACCTCAGACTTGTCCACCTGGGGAGAATGTATGCTTTACAAAGACTTGGTG  
TGATGCTCGGTGTAGCCAACTAGGAAAGCGAGTCGAAATGGGATGTGCTGCTACTTGCCCCAAAGTGAAG  
CCCGGTGTGGATATTAAATGTTGCTCAACAGACAAGTGCAACCCATTTCGAAAACGACACCTCCTTGGG  
AACGTCTCGAGGGAAGCCCTAA

>GAGZ01000008 Acanthophis wellsi 3FTx-Aca-62 mRNA sequence  
ATGAAACTCTGCTGCTGACCTTGGTGGTGGTGACAATCGTGTGCCTGGACTTAGGTGAAAGCGTGATAT  
GCTACCTGGGATATAAATTACGCTCAGACTTGTCCACCTGGGGAGAATGTATGCTTTACAAAGACTTGGTG  
TGATGCTCGGTGTGGCCTTCTAGGAAAGCGAGTTGAAATGGGATGTGCTGCTACTTGCCCCAAAGTGAAG  
CCCGGTGTGGATATTAAATGTTGCGAAACAGACAAGTGCAACCCATTTCGAAAACGACACCTCCTTGGG  
AAGTCTCTCGAGGGAAGCCCTAA

>GAGZ01000009 Acanthophis wellsi 3FTx-Aca-84 mRNA sequence  
ATGAAACTCTGCTGCTGACCTTGGTGGTGGTGACAATCCTGTGCCTGGACGTAGGTGACAGCGTGATAT  
GCTACCTGGGATATAAATTACGCTCAGCCTTGTCCACCTGGGGAGAATGTATGCTTTACAAAGACTTGGTG  
TGATGCTCGATGTCCCAACTAGGAAAGCGAGTCGAGATGGGATGTGCTGCTACTTGCCCCAAAGTGAAG  
CGCGGTGTGGATATTAAATGTTGCTCAACAGACAAGTGCAACCCATTTCATTAAAGTCTCGAGGGAAGC  
CCTAA

>GAGZ01000010 Acanthophis wellsi 3FTx-Aca-85 mRNA sequence  
ATGAAACTCTGCTGCTGACCTTGGTGGTGGTGACAATCCTGTGCCTGGACGTAGGTGACAGCGTGATAT  
GCTACCTGGGATATAAATTACGCTCAGCCTTGTCCACCTGGGGAGAATGTATGCTTTACAAAGACTTGGTG  
TGATGGTTCGATGTCCCAACTAGGAAAGCGAGTCGAAATGGGATGTGCTGCTACTTGCCCCAAAGTGAAG  
CGCGGTGTGGATATTAAATGTTGCTCAACAGACAAGTGCAACCCATTTCATTAAAGTCTCGAGGGAAGC  
CCTAA

>GAGZ01000011 Acanthophis wellsi 3FTx-Aca-108 mRNA sequence  
ATGAAACTCTGCTGCTGACCTTGGTGGTGGTGACAATCGTGTGCCTGGACTTAGGATACACCATGCAAT  
GTTACAACCACCCGTTATTGCAAGATAAAACCATTTAACTTGTGCTTTTGGGGTGAGCTCTTGCTTTAA  
AAAGACTTGGAAGTTCAACGTGAAACTATGATTGAAAGGGGATGTGGTTGCCTAACGTGAAGCCTGGT  
GTTAGACTTACATGTTGCAAAACAGACAAATGCAACAATTAG

>GAGZ01000012 Acanthophis wellsi 3FTx-Aca-112 mRNA sequence  
ATGAAACTCTGCTGCTGACCTTGGTGGTGGTGACAATCGTGTGCCTGGACTTAGTATACACCATGCAAT  
GTTGCAACCAACAGTCATCGCAACCTAAAACCACTACAACCTTGTCCAGGTGGGGTGAGCTCTTGCTATAA  
AAAGACTTGGAGAGATCATCTGTGGACTTAGAATTGAAAGGGGATGTGGTTGCCCTCACGTGAAGCCTGGT  
ATTTGGCTTCTTTGTTGCAAAACAGACGAATGCAACAATTAG

>GAGZ01000013 Acanthophis wellsi 3FTx-Aca-118 mRNA sequence  
ATGAAACTCTGCTGCTGACCTTGGTGGTGGTGACAATCGTGTGCCTGGACTTAGTATACACCATGCAAT  
GTTGCAACCAACAGTCATCGCAACCTAAAACCACTACAACCTTGTCCAGGTGGGGTGAGCTCTTGCTATAA  
AAAGACTTGGAGTGATCATCTGTGGATCTAGAACTGAAAGGGGATGCGGTTGCCCTCACGTGAAGCCCCGT  
ATTACACTTATTTGTTGCAAAACAGATGAATGCAACAATTAG

>GAGZ01000014 Acanthophis wellsi ACN-Aca-1 mRNA sequence  
ATGAGCGTGCCTCACGCCAACGACATCGCCACCGAGGCCGTGGTGATGCAGTACACTGACTGGCAGGACC  
AGGACAACGGGGAGAAGAACAGGGAGGCCCTGGACGACATCGTGGGGGACCACAACATCATCTGCCCGGT  
TGTGCAAGTTCGCCAATGACTACGCCAAGCGCAAGAACAGGTGTACGCCCTACCTCTTTGACCAACCGGGCC  
TCCAACCTGCTCTGGCCTCCCTGGATGGGCGTCCCCACGGCTACGAGATCGAGTTTGTCTTTGGWATGC  
CCCTCAACGACAGCCTGAACCTACACGCCCMAMGAGAAGGAGCTGAGCCGACAGGATGATGCGCTACTGGGT  
CGAACTTTGCCCGGACAGGGAACCCGACCGACCTGCCGACTAAGAACGGGGCTGGCCCCACCTACAC  
CGCCTCCCGCGCAGTACGTCCAGCTCAACACCCAGCCGCTGGCCACCCAACCCAG

>GAGZ01000015 Acanthophis wellsi CRiSP-Aca-1 mRNA sequence  
ATGTTCAAAATGGAATGGAATCTCGTGCTGCTCAAAATGCAAAACGTTGGGCAGATAGATGCTTTTTTG  
CTCAGTCCACCATACAAGAACTGTGGGAAAACCTCCGTTGGTGAATAATATTCATGTCAAGTCA  
ACCTTTTCCATGGAGTGAAGTACGCTCAGGCTTGGTATGATGAAGTCAAAAAATTCGTCTATGGCATTGGA  
GCAAGCCACAGGTTCTGTTATTGGCCATTATACCCAGGTAGTTTGGTACAAAAGTCACCTTCTTGTT  
GTGCTTCTGCCAAATGTTCTTCAACCAATACCTCTACGTTTGTCAATACTGCCAGCAGGGAACATCAG  
AGGTTCAATTGCTACTCCATATAAATCAGGGCCATCTTGTGGGACTGTCTTCAGCTTGTGTCAACAGA  
CTATGCACAAATCCTTGCAAAATATACAATGACTTCTCGAAGTGAAGCTTTAGCGAAAAAACTAAAT  
GCAAGACTGGATGGATCAAGTCAAAATGCCCTGCTACTTGTCTTCTGCCACTGAAATAATATAG

>GAGZ01000016 Acanthophis wellsi KP-Aca-6 mRNA sequence  
ATGCTTCTTGGAGGTCTTCTTCTCCTGCTGGGACTCCTCACCTCTGGGAGGGGCTGACCCCGTCTCCA  
GCAAGGACCGTCCACACTTCTGTCTATCTGCCCTCATGACACCGGACCATGTAAAGGCATGTTCCAGCCTT  
CTACTACCACCCAGGTCTCGTACATGCCTACAGTTTATTTATGGTGGATGCCGAGGGAATCTTAACAAT  
TTTAAGACCATAGATGAATGCAACGCATCTGTGCTGCATGA

>GAGZ01000017 Acanthophis wellsi KP-Aca-8 mRNA sequence  
ATGCTTCTTGGAGGTCTTCTTCTCCTGCTGGGACTCCTCACCTCTGGGAGGGGCTGACCCCGTCTCCA  
GCAAGGACCGTCCACACTTCTGTCTATCTGCCCTCATGACACCGGACCATGTAAAGGCATGTTCCAGCCTT  
CTACTACCACCCAGGTCTCGTACATGCCTACAGTTTATTTATGGTGGATGCCGAGGGAATGCTAACAAT  
TTTAAGACCATAGATGAATGCAACGCATCTGTGCTGCATGA

>GAGZ01000018 Acanthophis wellsi KP-Aca-9 mRNA sequence  
ATGCTTCTTGGAGGTCTTCTTCTCCTGCTGGGACTCCTCACCTCTGGGAGGGGCTGACCCCGTCTCCA  
GCAAGGACCGTCCACACTTCTGTCTATCTGCCCTCATGACACCGGACCATGTAAAGGCATGTTCCAGCCTT  
CTACTACCACCCAGGTCTCGTACATGCCTACAGTTTATTTATGGTGGATGCCGAGGGAATGCTAACAAT  
TTTAAGACCATAGAGGAATGCAACGCATCTGTGCTGCATGA

>GAGZ01000019 Acanthophis wellsi KP-Aca-1 mRNA sequence  
ATGCTTCTTGGAGGTGTTCTTCTCCTGCTGGGACTCCTCACCTCTGGGAGGGGCTGACCCCGTCTCCA  
GCAAGGACCGTCCACACTTCTGTCTATCTGCCCTCATGACACCGGACCATGTAAAGGCATGTTCCAGCCTT  
CTACTACCACCCAGTTCTCGTAAATGCCTAGAGTTTACTTATGGTGGATGTGAAGGGAATGCTAACAAT  
TTTAAGACCATAGATGAATGCAACGCACCTGTGCTGTATGA

>GAGZ01000020 Acanthophis wellsi LAO-Aca-1 mRNA sequence  
GCCCTCTTACCCTTCAAAGATTAAAAATGGAGCCTGGATAAATATGCTATGGGTGCTATAACCTCTT  
TCACTCCTTACCAGTTTCAAGATTTTATTGAACAGTCGCTGCACCTGTAGGCAGAACTACTTTGCAAGG  
GGAGTACACTGCTAGCCTTCTATGGTTGGTTGGACAGACAATTAAGTCAGGGCTGACAGCAGCAAGAGAT  
GTGAATCGTGCTTCTCAGAAGCCATCAAGAATCCAGCTGATCAGTGACAATCAACTTCAAGAAGGAGATC  
AACACAAGGAATTTATAACAGCCATTCTGGCAACTTCGGGTGTTTTCAGACTAA

>GAGZ01000021 Acanthophis wellsi LP-Aca-2 mRNA sequence  
ATGGGGCGATTCTCTTGGTGGCCCTGTGCTTGCTGGTTGTGACTTTATCCCTAAATGGAATTGGAGCTG  
ATCATATTGCTCTCGGGCTGGTTCCCATTTAAGACATTTTGCTACAAGGTCTAGAGAAATGGAAGAC  
CTGGGAAGATGCCAGGCATCTGCGTGCACTTCAAGACAGCAGCCATCTGGCCTCCATCCACAGCCAA  
GCAGAGTCTCTTTCACATGCCAAAGGTGATCTTCAGGGAACCGATCGTCTCACTAATGTCTGGATTGGAC  
TGAATGATCCAGAGRAAAATCGCACCTGGAAGTGGTCTGATGGCTCCAATTTAATTATACATCATGGGG  
AATGTTGAAACCAGGCATTTTGTATCATGGGAAGTACTGCGTTTCAGTTGACCAGAATCTTAGGGTTTTAT  
AGATGGGAAGCTGCGAAGTTGTGAGTCAAGAATTTTTCATCTGCAAGATG

>GAGZ01000022 Acanthophis wellsi NP-Aca-6 mRNA sequence  
ATGGTCTGCCTCTCACGTCTGGCGGGCGGCGGGCTGTGCTGCTGCTGGTGTGGCCCTGCTGCCTCTCG  
CCCTCGACGGGAAGCCGACGGCGCGCCTCAGGCGCTGCGCACGGCTCCGGCGGGCGGCATGATGGCGTC  
GCGGCGGGAGTGCAGGAGCAGCCGCGCTCAGGCGCTGATAAAGGACTCCTCGGGTCCGCGGGCTGAGCGC  
AGCGGCTCCAAGACGGCCACGAAAGGGAACGGCTGCTTCGGCGTCAAGCTCGACCGCATCGGCAGCGTGA  
GCGGCATGGGCTGCGGAGGCGTCCCGAAGCCGACACTGGCGGATCCTAA

>GAGZ01000023 Acanthophis wellsi NP-Aca-7 mRNA sequence  
ATGGTCGGCCTCTCACGTCTGGCGGGCGGCGGGCTGTGCTGCTGCTGGTGTGGCCCTGCTGCCTCTCG  
CCCTCGACGGGAAGCCGACGGCGCGCCTCAGGCGCTGCGCACGGCTCCGGCGGGCGGCATGATGGCGTC  
GCGGCGGGAGTGCAGGAGCAGCCCCAGCAGCGCTGATAAAGGACTCCTCGGGTCCGCGGGCTGAGCGC  
AGCGGCTCCAAGACGGCCACGAAAGGGAACGGCTGCTTCGGCGTCAAGCTCGACCGCATCGGCAGCGTGA  
GCGGCATGGGCTGCGGAGGCGTCCCGAAGCCGACACTGGCGGATCCTAA

>GAGZ01000024 Acanthophis wellsi PLA2-Aca-2 mRNA sequence  
ATGTATCTGCTCACCTTCTGCTGCTTGTGGCAGTTTGTGTCTCCCTCTTAGGAGCCGAGAAATTCCTC  
CTCTGCCTCTCAACCTCGCACAAATTCGGCAAAATGATTGAATGTGCCAACAAGGGCAGTCGACCTTCTTT  
GGATTATATGAACACGGTTGTCTACTGTGGCACAGAAGATCGCGGACACCGGTGGATGAGTTGGATAGG  
TGCTGCAAAATACATGACGACTGTCTATGCTGAAGCCGAAAAACATGGATGCTTCCCCAAGATGACGTCGT

ATAGTTGGAATGTGCCAACGATGTACCCGCTGCAATTCAAAAACGCAGTGTCAACATTTTGTGTGTTA  
TTGTGACCTCTGGGCAACCAAGTGCTTTTCCCAAGAACTTACAACAAGAACAACTTCGGTATCGACACC  
AAGACACGTTGCCAATGA

>GAGZ01000025 *Acanthophis wellsi* PLA2-Aca-8 mRNA sequence  
ATGTATCCTGCTCACCTTCTGGTCTGTTGGCAGTTTGTGTCTCCCTCTTAGGAGCCTCCGACATTCCTC  
CGCAGCCTCTCAGCCTCCTTCATTTCAAGAACATGATTAATGTGCCAACAAGGGCACTCGAAGTTGGTT  
GCGTTATGTGAACCTACGGTTGCTACTGCGGCTGGGGAGGTAGCGGGAAACCGGTGGATGAGTTGGACAGG  
TGCTGCAAAGCACATGACGACTGCTATGCTGAAGCCAGAAGAAAACGATGCTTCCCCAAGTTGACGTTGT  
ATAGTTGGAATGTAGCAGCCATGTGCCCGTCTGCAATTCAAAAAGGAAGTGTAAAGTTTTGTGTGTGA  
TTGTGACGCCACAGCAGCCAAGTGCTTTGCCAAAGCCCTTACAACAAGACCAACTTCGGTATCAACACC  
AAGAACGTTGCCAATGA

>GAGZ01000026 *Acanthophis wellsi* PLA2-Aca-9 mRNA sequence  
ATGTATCCTGCTCACCTTCTGGTCTGTTGGCAGTTTGTGTCTCCCTCTTAGGAGCCTCCGACATTCCTC  
CGCAGCCTCTCAGCCTCCTTCATTTCAAGAACATGATTAATGTGCCAACAAGGGCACTCGAAGTTGGTT  
GCGTTATGTGAACCTACGGTTGCTACTGCGGCTGGGGAGGTAGCGGGAAACCGGTGGATGAGTTGGACAGG  
TGCTGCAAAGCACATGACGACTGCTATGCTGAAGCCAGAAGAAAACGATGCTTCCCCAAGTTGACGTTGT  
ATAGTTGGAATGTGCCAAGGATGTGCCCGTCTGCAATTCAAAAAGGAAGTGTAAAGTTTTGTGTGTGA  
TTGTGACGCCACAGCAGCCAAGTGCTTTGCCAAAGCCCTTACAACAAGACCAACTTCGGTATCAACACC  
AAGACACGTTGCCAATGA

>GAGZ01000027 *Acanthophis wellsi* PLA2-Aca-34 mRNA sequence  
ATGCGGTTGCCTCAGGTGAAACCTGTATCCTGCTCACCTTCTGGTCTGTTGGCAGTTTGTGTCTCCC  
TCTTAGGAGCCGCGACATTCCTGTGCCATCTCTCAACTTCGAACAATTTCGGCAACATGATTCAATGTAC  
CATCCCTCGAAGAATCTTGTGTTGGTTATATGGAATACTGCTACTGCGGCCAGGAGGTAGCGGG  
ACACCGATGGATGAGTTGGATAGGTGCTGCCAGACTCATGACAACCTGTATGTGAAGCCGAAAACTTC  
CTGCATGTAAGGCCATGTCTGAGTGAGCTGTACAACGACACCTATTTCATACAGCTGTATTGAACGCCA  
CACTGCAACGATAACAGTAACTGCTTAAAGCCCTTATCTGTAATTGTGACCGCAAGCAGCCAACTGC  
TTCGCCGAGCCCTTATAACGACTTGAACATAATATCGACACCACTGAACATTGCCAATGA

>GAGZ01000028 *Acanthophis wellsi* PLA2-Aca-38 mRNA sequence  
ATGTATCCTGCTCACCTTCTGGTCTGTTGGCAGTTTGTGTCTCCCTCTTAGGAGCCTCCGACATTCGTC  
CGCAGCCTCTCAACCTCCTTCAGTTCGGCTTCATGATTCGATGTGCCAACAACCGCAGACGACCTGTTTG  
GCATTATATGGAGCTCCGACCTCTGCTACTGCGGCAAGGAGGTAGCGGGACACCGGTGGATGCGTTGGATAGG  
TGCTGCAAAATACATGACGACTGCTATGCTGAAGCCGAAAAACGCTACGGATGCTACCCCTACTGGACGT  
TGCTATAGTTGGAATGTTACGGAAGTGGACCGTACTGCAATTCAAAAACGCAGTGTCAACGTTTGTGTG  
TGTGTGACTCCAGAGCAGCCATCTGTTTTCGCTCAAAACCTTACAACAACCGGAACCTGGAATATCAAC  
ACCAAGACACGTTGCCGATGA

>GAGZ01000029 *Acanthophis wellsi* PLA2-Aca-43 mRNA sequence  
ATGCTTATATTGTGTTGCCTTAATCCTCTTAAAACTGAAATAAAGTTGCAAAATATATTCACTCCGATTC  
ATCTTGCTTGCAGCTTCACCACTGACAAAATGTATCCTGCTCACCTTCTGGTCTGTTGGCAGTTTGTGT  
CTCCCTCTTAGGAGCTCCGACATTCCTCCGAGCCTCTCAACCTCTATCAGTTTCGGGGGAATGATAAA  
TGTGCCAACAAGGGCACTCGAAGTTGTTGAGTTATGTGAACACGTTGCTACTGCGGCTGGGGAGGTA  
CGGGGAAACCGGTGGATGAGTTGGATAGGTGCTGCCAGATTCATGACAACCTGCTATGCTGAAGCCGAAA  
AAAACGATGCAAAACCAAGTTGACGTTGATAGTTGGAAATGTGCCAAGGATGTACCCGTCTGCAATTCA  
AAATCGGTGTGTGGAAGTTTTGTGTGTGATTGTGACCCGAGCAGCCAAGTGCTTTGCCAAAGCCCTT  
ACAACAAGAACAACATCGGTATTGTTTCCAAGAACGTTGCCAATGA

>GAGZ01000030 *Acanthophis wellsi* PLA2-Aca-45 mRNA sequence  
ATGTATCCTGCTCACCTTCTGGTCTGTTGGCAGTTTGTGTCTCCCTCTTAGGAGCCTCCGACATTCCTC  
CGCAGCCTCTCAACCTCTATCAGTTTCGGGGGAATGATTAATGTGCCAACAAGGGCACTCGAAGTTGGTT  
GAGTTATGTGAACCTACGGTTGCTACTGCGGCTGGGGAGGTAGCGGGAAACCGGTGGATGAGTTGGATAGG  
TGCTGCCAGATTCATGACAACCTGCTATGCTGAAGCCGAAAAAACGATGCAAAACCAAGTTGACGTTGT  
ATAGTTGGAAATGTGCCAAGGATGTGCGGCTGCAATTCAAAATCGGTGTGTGGAAGTTTGTGTGTGA  
TTGTGACGCCGAGCAGCCAAGTGCTTTGCCAAAGCCCTTACAACAAGAACAAACATCGGTATTGTTTCC  
AAGACACGTTGCCAATGA

>GAGZ01000031 *Acanthophis wellsi* PLA2-Aca-97 mRNA sequence  
ATGATTCGATGTGCCAACAACGCAGACGACCTGTTTGGCATTATATGGACTACGGTTGCTACTGCGGCA  
AAGGAGGTAGCGGGAACCGGTGGATGCGTTGGATAGGTGCTGCAAAATACATGACGACTGCTATGCTGA  
AGCCGAAAAACGCTACGGATGCTACCCCTACTGGACGTTGTATAGTTGGAATGTTACGGAAGTGACCG  
TACTGCAATTCAAAAACGCAGTGTCAACGTTTGTGTGTGATTGTGACGCCGAGCAGCCAAGTGCTTTG  
CCAAAGCCCTTTACAACAAGAACAAACATCGGTATTGTTTCCAAGAACGTTGCCAATGA

>GAGZ01000032 *Acanthophis wellsi* SVM-P-Aca-4 mRNA sequence  
ATGATCCAAGCTCTCTTGGTAACATATGCTTCATGGTTTTTCCATATCAAGGGAGCTCTATCATCCTGG  
AATCCGGGAATGTTAATGATTATGAAGTAGTGATCCACAAAAAGTGCTGTATTGCCCAAAGGAGGAGT  
TCAGAATCTCAGCCAGAGACCAAGTATGAAGATACAATGCAATATGAATTCACATGAATGGAGAGCCA  
GTGGTCTTCACTTAGAAAGAAATAAAGGACTTTTTTCAGAAGATTACACTGAAACTCATTTATGCCCCG  
ATGGCAGAGAAATTACAACGACGCCCTCCGGTTCAGGATCACTGCTATTATCATGGCTACATTGAAATGA  
AGCTATTCAAGTCAAGTCATGACCTGATGCGACGCGTTGAAAGGACATTTCAAGCATCGAGGGGAGACA  
TACTTTATTGAGCCCTTGAAGCTTTCGACAGTGAAATCCCATGCAATCTACAAGATGAAAAATGTAGAAA  
AAGAGGATGAGATCCCCAAAATCTGTGGAGTAACCCAGACTACTTCGGAGTCAGATGAGCCCATCGAAAA  
GATCTCTCAATTAACATAACTCTGTGAACAAGACAGGTACTTGAAGGTCAAAAAATACATTGAGTTTTAC  
GTGGTTGTGGACAACAAAATGTACAAGAAATTACAGCAGCAACAGAGATGCTATAAAAAGAGAGTATATG  
AAATGTGTCACACTTTAAATGTGATGTACAGACCTTTGAATATTTTCATTGCACTGATTGGCCACAAAT  
TTGGACCAACAAGATAAGATTGAACATTGAACCAAGAGGTGGCTGTCACTTTGACATCATTGTGAAAAATG  
AGAGAAACAGTTTTACTGCCACGCAAGGAATGATAATGCTCAGTTACTTACGGGCATTGACTTCAACG  
GAGCTACTGTAGGACGTGCTTACGTTGGCACCTCTGCAGTCCAGAGAAATCTGTAGCAGTTATTCAGGA  
TTATGCAAAAGAACAGCATGGTGGCATCTACAATGGCCCATGAGTTGGGTGATAATCTGGGCATTGAT  
CATGACAACGCTTCTGTAAATGTCAGTGCTGGACCATGCATTATGTCTGCAAGATAAGTAATGAACCTC  
TCTCTGAGTTGACCAATTGTAGTATCCAGAAATATCAGAGGTATCTTCTTAGAGTCAGACCACAATGCAT  
TCTCAACAACCCCTTGAGCAGCATGATATTGTTACACCTCCAGTTTGTGGAATTACTTTGTGGAGCGGGGA  
GAAGAATGTGACTGTGGCTCTCCTGTGGATTGTCAAAGTGCCTGCTGCAACGCCACAACTTGTAACTGC  
AACACGAGGCACAGTGTGACTCTGAAGAGTGTGTGAGAAAAAGCAAAATTAAGAAAGCAGGAACAGAAATG  
CCGGGCAAGAAAGCATGACTGTGCTGCTGAAATCTGTACTGGCCAATCTGCTGAGTGTCCACCGGAC  
AGCTTCCAGAGGAATGGACATCCATGCCAAAACAACAGGGTTACTGCTACAATGGGAAATGCCCCCTCA  
TGACAAACCAATGTATTGATCTCTGGGGTCCAGGTGTAAATGTGTCTCCAGATATATGTTTTACGTTGAA  
CCAGGATGGGAAAGATTGTAGCTTCTGCAGAAATGAAAAATGGTAGAAGGATTCATGTGCAGCAAGGAT

GAAAGTGTGGCAGCTTATACTGCAAAAGGGGAAACCGTCGATGCATCTGCGTTGATGGCCCAGATTATA  
GAATGGTTGAACCTGGAACAAAATGTGGAGATGGAAGGTGTGCATCAACAGGCAGTGTGTTGATGTGCA  
GACAGCCTACTGA

>GAHA0000000.1|GAHA01000000 TSA: Brachyurophis [Simoselaps] roperi, transcriptome shotgun assembly, transcriptome shotgun assembly

>GAHA01000001 Brachyurophis [Simoselaps] roperi 3FTx-Bra-3 mRNA sequence  
ATGAAACTCTGCTGCTGACCTTGGTGGTGGTGACAATCGTGTGCCTGGACTTAGGTAAATAGCTTCTCAT  
GCTACAAAACACCTGATCTAAATCTGAGCCTTGTGAACCTGGGGAGAACCAATGCTATACAAGGACTTG  
GTGTGATGCTCGGTGTGGCCTCATGGGAAAGCGAATCGAACTGGGATGTGCTGCTACTTGCCCTACAGCG  
AAGACCGGCATCGATATTAAGTGTGTCTCAACAGACAATTGCAACCCACATCCGAAACAGAAATCTCGTT  
GA

>GAHA01000002 Brachyurophis [Simoselaps] roperi 3FTx-Bra-6 mRNA sequence  
ATGAAACTCTGCTGCTGACCTTGGTGGTGGTGACAATCGTGTGCCTGGACTTAGGTGACAGCTTGATAT  
GCTTCGAGGGATATAAAGGCCCTAAGACTTGTCCACCTGGGGCAGAACCTATGCTATACAAAGACTTTGTG  
TGGTTTTTCGTTGTGCCAGCAGAGGACCGCGAGTCTGAACTGGGATGTGCTGCTACTTGCCCTATTCCAAAG  
CCCCGTGAGGAGGTTACCTGTTGCTCAACAGACAATTGCAACCCATTTCCGAAATGGAATCCTTGGGGGT  
TGCTCTCATCCATCATGGACCATCCTTGA

>GAHA01000003 Brachyurophis [Simoselaps] roperi 3FTx-Bra-8 mRNA sequence  
ATGAAACTCTGCTGCTGACCTTGGTGGTGGTGACAATCGTGTGCCTGGACTTAGGTGACAGCTTGATAT  
GCAACGTGGATTATAAAAAGCATGAGACTTGTCCACCTGAGCGTAACCTATGCTATAAAATTACTTCGTT  
TCTTGGTGGTGTCCCAAGGGGACAACAGCTAATCAAATGGGATGTGCTGCTACTTGCCCTAGACGGCTC  
GGTGTGAAGATTACCTGTTGCTCAACAGACAATTGCAACCAACATAGGCCACGTTGTTGA

>GAHA01000004 Brachyurophis [Simoselaps] roperi 3FTx-Bra-9 mRNA sequence  
ATGAAACTCTGCTGCTGACCTTGGTGGTGGTGACAATCGTGTGCCTGGACTTAGGTGACAGCTTGATAT  
GCAACGTGGATTATAAAAAGCATGAGACTTGTCCACCTGGGCGTATCCTATGCTATAAAATTACTTCGTT  
TCTTGGTGGTGTCCCGAGAGAGAAAGGCTAATCAAATGGGATGTGCTGCTACTTGCCCTAGACGGCCCC  
GGTGTGAAGGTTACCTGTTGCTCAACAGACAATTGCAACCAACATAGGCCACGTTGTTGA

>GAHA01000005 Brachyurophis [Simoselaps] roperi 3FTx-Bra-10 mRNA sequence  
ATGAAACTCTGCTGCTGACCTTGGTGGTGGTGACAATCGTGTGCCTGGACTTAGGTGACAGCTTGATGT  
GCAACGTGGATTATAAAAAGCATGAGACTTGTCCACCTGAGCATATCCTATGCTATAAAATTACTTCGTT  
TATTGGTGGTGTCTCCGAGGGGAGAACAGCTAATCAAATGGGATGTGCTGCTACTTGCCCTAGACGGCTC  
GGTGTGAAGGTTACCTGTTGCTCAACAGACAATTGCAACCAACATAGGCCACGTTGTTGA

>GAHA01000006 Brachyurophis [Simoselaps] roperi 3FTx-Bra-12 mRNA sequence  
ATGAAACTCTGCTGCTGACCTTGGTGGTGGTGACAATCGTGTGCCTGGACTTAGGTGACAGCTTGATAT  
GCAACGTGGATTATAAAAAAATGAGACTTGTCCACCTGGGCATAACCTATGCTATAAAATTACTTCGTG  
TGTTGGTGGTGTCTCCCAAGGGGAGAAAAGCTAATCAAATGGGATGTGCTGCTACTTGCCCTAGACGGCTT  
GGTGTGAAGGTTACCTGTTGCTCAACAGACAATTGCAACCAACGTAGGCCACCTCGTTGA

>GAHA01000007 Brachyurophis [Simoselaps] roperi 3FTx-Bra-13 mRNA sequence  
ATGAAACTCTGCTGCTGACCTTGGTGGTGGTGACAATCGTGTGCCTGGACTTAGGTGACAGCTTGATAT  
GCAACGTGGATTATAAAAAATGAGACTTGTCCACCTGGGCATAACCTATGCTATAAAATTACTTCGTGTGT  
TGGTGGTGTCTCCCAAGGGGAGAAAAGCTAATCAAATGGGATGTGCTGCTACTTGCCCTAGACGGCTTGGT  
GTGAAGGTTACCTGTTGCTCAACAGACAATTGCAACCAACGTAGGCCACCTCGTTGA

>GAHA01000008 Brachyurophis [Simoselaps] roperi 3FTx-Bra-17 mRNA sequence  
ATGAAACTCTGCTGCTGACCTTGGTGGTGGTGACAATCGTGTGCCTGGACTTAGGATACACCATGACAT  
GCTACAAAACAGCTCCTGTTAGATCTGAGCCTTGTCCACCTGGGGAGGACCTATGCTATACAAAGGCTTG  
GTGTGATTTTCGGTGTGGCACCCTAGGAAAGATACTCGAACTGGGATGTGCTGCTACTTGCCCTATACCG  
AAGCACTATGAGGATGTTAAGTGTGTCTCAACAGACAATTGCAACCCATTTCCGAAACCGACAGGTGTTA  
GACCAGGTCGACCAGTGGTTGA

>GAHA01000009 Brachyurophis [Simoselaps] roperi 3FTx-Bra-25 mRNA sequence  
ATGAAACTCTGCTGCTGACCTTGGCGGTGGTGACAATCGTGTGCCTGGACTTAGGATACACCTAAAAAT  
GTCGCAGTTCTAGGATTGCTAATCGTAATGTGGTTTGTAAAAAATACCAGACCATTGCTTTCACTATCA  
AGTTCGTCCATATCAAAATACTGTGTTAACAGGATGGGATGTAGTGATTCTTGCCCTAGAAAGGATGCT  
GTGTGTTGCAGTTCAGACTTGTGCAACTAG

>GAHA01000010 Brachyurophis [Simoselaps] roperi 3FTx-Bra-26 mRNA sequence  
ATGAAACTCTGCTGCTGACCTTGGTGGTGGTGACAATCGTGTGCCTGGACTTAGGATACACCTAAAAAT  
GTCCGAGTTCTAGGATTGCTAATGGTAATGTGGTTTGTGAAAAATACCAGACCATTGCTTTTCATATCA  
AGTTCGTCCATATCAAAATACTGTGTTAACAGGATGGGATGTAGTGATTCTTGCCCTAGAAAGGATGCT  
GTGTGTTGCAGTTCAGACTTGTGCAACTAG

>GAHA01000011 Brachyurophis [Simoselaps] roperi 3FTx-Bra-27 mRNA sequence  
ATGAAACTCTGCTGCTGACCTTGGTGGTGGTGACAATCGTGTGCCTGGACTTAGGATACACCTAAAAAT  
GTCGCAGTTCTAGGATTGCTAATCGTAATGTGGTTTGTAAAAAATACCAGACCATTGCTTTCACTATCA  
AGTTCGTCCATATCAAAATACTGTGTTAACAGGATGGGATGTAGTGATTCTTGCCCTAGAAAGGATGCT  
GTGTGTTGCAGTTCAGACTTGTGCAACTAG

>GAHA01000012 Brachyurophis [Simoselaps] roperi 3FTx-Bra-28 mRNA sequence  
ATGAAACTCTGCTGCTGACCTTGGTGGTGGTGACAATCGTGTGCCTGGACTTAGGATACACCGAGATAT  
GTTTCAACCAACAGTCATGGCAACCTGAAACCACTACAACCTTGTCCAGATGGGGAGACCTCTTGCTATAA  
AAAGACTTTGATCAGTTTGTTTAGAATTCTAATTGAAAAGGGATGTGGTTGCCCTAAGGAGAGGAGCAAT  
TTTAGACTTATGTGTTGCCAAAAAGACAAATGCAACAATTAG

>GAHA01000013 Brachyurophis [Simoselaps] roperi 3FTx-Bra-30 mRNA sequence  
ATGAAACTCTGCTGCTGACCTTGGTGGTGGTGACAATCGTGTGCCTGAACTTAGGATACACCGAGATAT  
GTTTCAACCAACAGTCATGGCAACCTGAAACCACTACAACCTTGTCCAGATGGGGAGACCTCTTGCTATAA  
AAAGGATTTGATGAGTTTCCTTTGGAATTCTAATTCTAAGGGGATGCGGTTGCCCTAAGGAGGTCCCCAAT  
CTTTTACTTATGTGTTGCAAAAAAGACAAATGCAACAATTAG

>GAHA01000014 Brachyurophis [Simoselaps] roperi 3FTx-Bra-34 mRNA sequence  
ATGAAACTCTGCTGCTGACCTTGGTGGTGGTGACAATCGTGTGCCTGAACTTAGGATACACCGAGATAT  
GTTTCAACCAACAGTCATGGCAACCTGAAACCACTACAACCTTGTCCAGATGGGGAGACCTCTTGCTATAA

AAAGACTTTTGATCAGTTTGTGTTAGAAATTTCTAATTGAAAAGGGATGTGGTTGCCCTAAGGAGAGGAGCAAT  
TTTATGTGTTGCCAAAAAGACAAATGCAACAATTAG

>GAHA01000015 Brachyurophis [Simoselaps] roperi 3FTx-Bra-36 mRNA sequence  
ATGAAAACCTCGCTGCTGACCTTGGTGGTGGTGACAATCGTGTGCCTGGACTTAGGATACACCAGGATAT  
GTTTCAACCAACAGTTATGGCAACCTGAAACCACTACAACCTTGTCAGATGGGGAGACCTCTTGCTATAA  
AAAGAATTTGATCAATTTGTTTGAATTCGAATTGAAAGGGGATGTGGTTGCCCTAAGGAGAGGGGCTAT  
TTTAGACTTATGTGTTGCAAAAAAGACAAATGCAACAATTAG

>GAHA01000016 Brachyurophis [Simoselaps] roperi 3FTx-Bra-38 mRNA sequence  
ATGAAAACCTCGCTGCTGACCTTGGTGGTGGTGACAATCGTGTGCCTGGACTTAGGATACACCAGGATAT  
GTTTCAACCAACAGTCATGGCGACCTGAAACCACTACAACCTTGTCAGATGGGGAGAACACTTGCTATAA  
AAAGGTTTTTCATGACTCCCTTTGAATTCGAATTGAAAGGGGATGTGGTTGCCCTAAGGAGAGGGCGCAGT  
TTTAGACTTATGTGTTGCCAAAAAGACAAATGCAACAATTAG

>GAHA01000017 Brachyurophis [Simoselaps] roperi CRiSP-Bra-2 mRNA sequence  
ATGGGGTTAASCARGGGCTCATTCAAAACAATAGAAATGATTGCCTTCATTGTCTTGCTAAGTCTTGCTG  
CAGTGTCTGCAACAGTCTTCTGGAACCTGTTGATTTTGCTTCTGAGTCAAGTAACAAAACAGGATACCAAAA  
GCAAAATGTTGACAGCACAATGCTTTAAGGAGATCAGTGAAACCAACTGCTAGGAACATGTTACAAATG  
GAATGGAATTTCTCGTGTCTGCTCAAAATGCAAAACGTTGGGCAGATAAATGTTCTTTTGCTCACAGTCCAC  
CACATAGAAGAACTGTGGGAAACTCGTGTGGTGAAAATATATTATGTCAAGTCAACCTTTTGCAATG  
GAGTAGAGTAATTCAGGCTTGGTATGATGAAAACAAAAAATTCGTCTATGGCACTGGAGCAAAAGCCACCA  
GGTTTCGGTTATTTGGCCATTATACCCAGATAGTTTGGTACAAAAGTCACTTCTTGTTGTGCTTCTGCCA  
GATGTTCTTTCATCCAATACTCTACGTTTGTCAAATACTGCCAGCAGGGAACATCAGAGGTTCAATTGC  
TACTCCATATAAATCAGGGCCACCTTGTGGGACTGTCTTTCGGCTTGTGTCAACGGACTATGCACAAAT  
CCTTGCAAAATATGAAATGACTTCTCGAACTGCAAAATCTTTAGCGAGAAAACTAAATGCCAGACTGAAT  
GGACCAAGTCAAAATGCCCTGCTTCTTGCTTCTGCCGCACTGAAATAATATAG

>GAHA01000018 Brachyurophis [Simoselaps] roperi LP-Bra-2 mRNA sequence  
ATGGGGCGGATTCTCTTTGTGAGCCTCGGCTTGCTGGTCTGGCTTTTCTCCCTAAGTGAATTTGGAGCCA  
ATCGCTATTGTCCCTTTGATTGGTTCTCCTACAATGTGTCTTGCTACAAGCTCTTCCACCTTCCGATGCC  
CTGGGACCAAGCACAGAGGCTCTGTGTGGAAACAGCAGGAAAACTCCCAACTCGCTCCATCCATGACGTG  
GGAGAGTCAGTGAAGTTGTCCAACATACATATCCCAAAGGTTGAAATATCTGATGTTTGGATGGGACTGA  
GGCTTTTCAAAGAGAAAGGCTATCGGAGTGGAGTGATGGCTCCAACCTCACTTACACATCTTGAAAGA  
AGGTGAACCCCAACAACTTTTCAACATTGAATTTCTGTGCTGTGCTGTGACCGGAAACACGGTATCTCAA  
TGGAACGATAAGAGCTGCGTGCTCCACATAAATTTATCTGCAAGTACCAGCCCCGAGTGAGGCAGGCA  
GCTAA

>GAHA01000019 Brachyurophis [Simoselaps] roperi LP-Bra-3 mRNA sequence  
ATGGCGCAATTCATCGTTGCTGAGCTTCAGCTTGCTGGTCTGGCCCTCTCCTTAAGGGGAAGTGGAGCTG  
ATCACATTGTCTCTCGCGGTGGTCTCCTATAATGAATTTTGCTACATGGTCTACAACAGATCCGTGAC  
CTGGAACAATGCAGAGAGATTCTGCCTGCAGCAAGAGCCAGACTGCCACCTCGCTCCATCCATAGCAAG  
CCAGAGGCAGCCTTCTAGTCGGGCTGGCCTACCAAGGCCAGCGCCGGGTCCAGTGTCTGGATCGGAT  
TGAACGATCCAGAGAAAAGACCGCTTGGCAATGGAGTGGATGGCTCCAGCATAAACTACAGGTCTGGAT  
GCCAGAGAGGCCCAACCAACATGCAAAACAAGGAGTATGTGTGTGTGCTGTGACGCTGGTCACGTTATGTC  
GGATGGAATGATCAGGACTGTGGGTCAGGCATAATTTTGTCTGCAAGTTCAGGCCAAGGACCAAGAGGA  
ACACCGTCGATGTTACAAACAGGAAGTAA

>GAHA01000020 Brachyurophis [Simoselaps] roperi LP-Bra-8 mRNA sequence  
ATGGGGCGGATTCTCTTTGGTGGAGCCTGAGCTTGCTGGTTGTGGCTTTGTCCCTAAATGGAATTTGGAGCTG  
ATCATCATTGCCCCTCGGACTGGATCTCCCTGGGGAAGTATTGCTACAAGTTCATCAAAGAACGGAAGAC  
CTGGGAAGATGCCAGGAATCCTGCTGCAACTTCAGAACAGCAGCCATCTGGCCTCCATCCACAGCACA  
GTAGATGCTCTTTTACACCCACAGGGTGATCTCCAGCAGAGGAGTCTTCTTCAATGATGTCTGGATTGGAC  
TGAATGATCCAGGGAAAAATCGTATCTGGGAGTGGACTGATGGCTCCGATTTTGATTATACATCCTGGAG  
AGTACGGGAACCCGGCAATGCTGATAGTGGGAGTACTGTGTTAAGTTGACCAGATTCTCAAGGTTTTTTT  
AGTTGGAAAGCTGCCAACTGTGAATCCGAGAATTTTTCCTGCTGCAAGATGTAG

>GAHA01000021 Brachyurophis [Simoselaps] roperi LP-Bra-11 mRNA sequence  
ATGGGGCGGATTCTCTTTGGTGGAGCCTGAGCTTGCTGGTTGTGGCTTTGTCCCTAAATGGAATTTGGAGCTG  
ATCATCATTGCCCCTCGGACTGGATCTCCCTGGGGAAGTATTGCTACAAGTTCATCGAAGAACGGAAGAC  
CTGGGAAGATGCCAGGAATCCTGCTGCAACTTCAGAACAGCAGCCATCTGGCCTCCATCCACAGCACA  
GCAGATGCTCTTTTGGCCTCAACACAATGATCTTCAAGAAAAGGCTCATAAGCACTAAAGTCTGGATTGGAC  
TGAATGATCCAGGGAAAAATCGTATCTGGGAGTGGACTGATGGCTCCAATTTTGATTATACATCCTGGGG  
AATATTTGAACCCGGCAATGCTGATCGTGGGAGTACTGCGTTTCAGTTTACCAGTTCGTTATGTTTCTCT  
GGTTGGAAAGCTGCCAACTGTGAATCCGAGAATTTTTCCTGCTGCAAGATGTAG

>GAHA01000022 Brachyurophis [Simoselaps] roperi LP-Bra-16 mRNA sequence  
ATGAAGCGATTTCATTCTTCTAAGTCTTGGCTTGCTGGTTGTGGCCCTCTCCTTAAGGGGAAGTGGAGCCA  
GTCCCCAATGTCCCTCCGAGTGGTCTTCTTAAATGGGCATTGCTACAAGTTCCTCAAACCTCTCAAGAG  
CTGGCGTGGAGCAGAGATGCTCTGAGGCAGCAGGAGGAAGGCAGCCACCTCACTCCATCCAAAGCTGG  
GCAGATGCAGATTATGTGGCCAAAGTTGATCCCGCGATGTCTTCTCGTCAATGTCTGGATCGGACTGA  
GTGATCCAGAGAAAACGACGCTCTGGAAGTGGAGTGTGGCTCCAAGTTCCTCTACAGATCCTGGAACG  
AGGAGAACCCAACTTTCTTCTGGAATGAGTACTGCGTCGAAGTTCGGAACCTGGCCAGGGTACCTCAGG  
TGGAATGATCAGAATTTTCAGGTTCAAACGTTATTTTCATCTGCAAGTTCAGCCCCAGGGTGAGGGAAGCA  
CCTGTTGA

>GAHA01000023 Brachyurophis [Simoselaps] roperi NP-Bra-2 mRNA sequence  
ATGCTCGGCCCTCGCCGCTGTGCTGGCGGCGGGCTGCTGCTGCTGCTACTGCTGGCCCTGCTGCCTCTCG  
CCCTCGACGGGAAGCGCGCGCTGCTCGCTCAGCGCTGCCAAGGCTCCGGCGGGCGGCACGACGCGCTC  
GCGGCGGAGCTGACGGAGCAGCAGCAGCGCGCTCACCGGCGGAGGAGTCTCGGGTCCCGCGGCTGGG  
CGCAGCGGCTCCAAGGCGGCCAAGATAGAGCTGGACAACGGCTGCTTTCGGCGTCCGGCTCGACCGCATCG  
GCACCTCGAGCGGCTGGGCTGCAAAACCCCGTCGAAAACGCCCGACGCGGACCTGCGCGATCCTA  
A

>GAHA01000024 Brachyurophis [Simoselaps] roperi NGF-Bra-3 mRNA sequence  
ATGCATAGCGTAACATCCATGTTGTGCTACACTCTGATTATAGCATTTCTGATTGGCATATGGGCAGCAC  
CAAAATCTGAAGATAATGTCCCTCTGGGCTCCCTGCAACATCTGACCTTTCTGACACCAGCTGTGCTCA  
AACTCAAGGGTCTGAAAACATCTCTTAAATACAGATCAGCACCATCTGCTCTCTAAGAAGGCAGAGGAT  
CAAGAAGTGGATCAGTAGCAAAATCATTGTGGATCCCAAGCTTTTTTCAAGAAGGGCGTTTCCAGTCAC  
CTCGTGTCTGTTTCAGCACTCAGCCCCACCGTTGTCAAGAGATGAGCAAGTGTGGAGTTCCCGGACAA  
TGAAGACGCTCTTAACATGAGTATCCGGGCCAAACGTGAAAATCATCTGCGTATAATGTAGGGGAACAT

TCTTTGTGTGACAGTATCAATAACTGGGTTACCAAAACCACAGCAACGGACATCCACGACAATAGGGTGA  
CTGTGACGGCGGAGATAAAATATTAATAACCAATTCTTCAAGCAGTACTTTTTTGAAACCAAGTGCAGAAA  
TCCAAATCCATTACCGAGTGGGTGCAGAGGCATTGATTCCAGGTATTGGAATCTTATGACACCACAACA  
CAGTCATTTGTTCATGGCATTAAACAACGGAAGACAATCGGGCATCCTGGCGCTTCATTCCGATTGACACTG  
CCTGTGTGTGCGTAATCAGTAGAAAAATCTGACAGCTTCTGA

>GAHA01000025 Brachyurophis [Simoselaps] roperi NGF-Bra-4 mRNA sequence  
ATGCATAGCGTAACGTCCATGTTGTGTACACTCTGATTATAGCATTCTGATTGGCATATGGGCAGCAC  
CAAAATCTGAAGATAATGTCCCTCTGGGCTCCCTGCAACATCTGACCTTTCTGACACCAGCTGTGCTCA  
AACTCACAAGGGTCTGAAAACATCTCTAAATACAGATCAGCGCCATCCTGCTCCTAAGAAGGCAGAGGAT  
CAAGAACTTGGATCAGCAGGCAACATCATTTGTGGATCCCAAGCTTTTTCAGAGAGGGCGTTTCCAGTCAC  
CTCGTGTCTGTCTCAGCACTCAGCCCCACCCTTGTCAAGAGATGAGCAAAGTGTGGAGTTCCCCGACAA  
TGAAGACGCTCTTAACATGAATATCCGGGCCAAACGTGAAAATCATCTGCGTATAATGTAGGGGAACAT  
TCTGTGTGTGACAGTATCAATAAGCTTGGTTACCAAAACCACAGCAACGGACATCCACGACAATAGGGTGA  
CTGTGACGGCGGAGATAAATCTTAATAACCATGTCTACAATCAGTACTTTTTTGAAACCAAGTGCATAAAA  
TCCAAATCCAGTACCGAGTGGGTGCAGGGGCATTGATTCCAGGTATTGGAATCTTATTGCACCACAACA  
CAGTCATTTGTTCATGGCATTAAACCATGGAAGCAATCGGACATCCTGGCGCTTCATTCCGATTGACACTG  
CCTGTGTGTGCGTAATCAGTAGAAAAATCTGACAGCTTCTGA

>GAHA01000026 Brachyurophis [Simoselaps] roperi NGF-Bra-7 mRNA sequence  
ATGCATAGCGTAACGTCCATGTTGTGTACACTCTGATTATAGCATTCTGATTGGCATATGGGCAGCAC  
CAAAATCTGAAGATAATGTCCCTCTGGGCTCCCTGCAACATCTGACCTTTATGACACCAGCTGTGCTCA  
AACTCACAAGGGTCTGAAAACATCTCTAAATACAGATCAGCGCCATCCTGCTCCTAAGAAGGCAGAGGAT  
CAAGAACTTGGATCAGCAGCCAACATCATTTGTGGATCCCAAGCTTTTTCAGAGAGGGCGTTTCCAGTCAC  
CTCGTGTCTGTCTGCACTCAGCCCCACCCTTGTCAAGAGATGAGCAAAGTATGGAGCTCCCCGACAA  
TGAAGATGCTCTTAAAGATGAGTATCTGGGCCCAACGTGAAAATCATCTGCGTATAATGTAGGGGAACAT  
TCTGTGTGTGACAGTATCAATAGCTGGGTACCAAAACCACAGCAACGGACATCTACGACAATAGGGTGA  
TTGTGACGGCGGGGATAAATCTTAATAACCATGTCTACAAGCAGTACTTTTTTGAAACCAAGTGCAGAAA  
TCCAAATCCAGTACCGAGTGGGTGCAGGGGCATTGATTCCAGGTATTGGAATCTTATTGCACCACAACA  
CAGTCATTTGTCAAGGCATTAAACCATGGAAGCAATCAGGCATCCTGGCGCTTCATTCCGATTGACACTG  
CCTGTGTGTGCGTAATCAGTAGAAAAATCTGACAGCTTCTGA

>GAHA01000027 Brachyurophis [Simoselaps] roperi NGF-Bra-9 mRNA sequence  
ATGCATAGCGTAACGTCCATGTTGTGTACACTCTGATTATAGCATTCTGATTGGCATATGGGCAGCAC  
CAAAATCTGAAGATAATGTCCCTCTGGGCTCCCTGCAACATCTGACCTTTCTGACACCAGCTGTGCTCA  
AACTCAGCAGGGTCTGAAAACATCTCTAACTACAGATCAGCGCCATCCTGCTCCTAAGAAGGCAGAAAGAT  
CAAGAACTTGGATCAGCAGCCAACATCATTTGTGGATCCCAAGCTTTTTCAGAGAGGGCGTTTCCAGTCAC  
CTCGTGTCTCTTAAAGATGAGTATCTGGGCCCAACCATTTGTCAAGAGATGAGCAAAGTGTGGAGTTCTGGACAA  
TGAAGACACTCTTAACAGGAATATCCGGACCAAAACGTGAAACTCATCTGTGCATAAACCAGGGGGAATAT  
TCTGTGTGTGACAGTATCGATAGCTGGGTACCAAAACCACAGCAACGGACATCCACGACAATAGGGTGA  
CTGTGATGGTGGATGTAATCTTAAATAACCATTTCTACAAGCAGTACTTTTTTGAAACCAAGTGCAGAAA  
TCCAAATCCATTACCGAGTGGGTGCAGGGGCATTGATTCCAGGTATTGGAATCTTATTGCACCACAACA  
CAGTCATTTGTTCATGGCATTAAACCATGGAAGCAATCGGACATCCTGGCGCTTCATTCCGATTGACACTG  
CCTGTGTGTGCGTAATCAGTAGAAAAATCTGACAGCTTCTGA

>GAHA01000028 Brachyurophis [Simoselaps] roperi PLA2-Bra-11 mRNA sequence  
ATGTATCCTGCTCACCTTCTGGTCTTGTGGCAGTTTGTGTCTCCCTCTTAGGAGCCTCCGACGTTCCCTC  
CGATGCCTCTCAACCTCCTACAATTCGGCAACATGATTAACGTGCCAACCGTGGCCGCTCGACCTGTAG  
GCATTATAGGACTACGGTTGCTACTGCGGCAAGGAGGTAGTGGGACACCGGTAGATGACTTGGATAGG  
TGCTGCAAAACACATGACGACTGCTATGATGAAGCCGAAAAATACTCTCATGTAAGCCCTACTACAACAT  
CCTATTTCATACAAATGTAATGAGGGCGAAGTCACTGCACAGATGACAACGATGAGTGTAGAGCCTTTAT  
TTGTAATTGTGACCGCACGGCAGCATCTGCTTCGCCAGAGCCTATTACAACGAGGAGAACTGGGATATC  
GACACCGCTGCAGTTGCCAATGA

>GAHA01000029 Brachyurophis [Simoselaps] roperi PLA2-Bra-12 mRNA sequence  
ATGTATCCTGCTCACCTTCTGGTCTTGTGGCAGTTTGTGTCTCCCTCTTAGGAGCCTCCGACGTTCCCTC  
CGATGCCTCTCAACCTCCTACAATTCGGCAACATGATTAACGTGCCAACCGTGGCCGCTCGACCTGTAG  
GCATTATAGGACTACGGTTGCTACTGCGGCAAGGAGGTAGTGGGACACCGGTAGATGACTTGGATAGG  
TGCTGCCAGTACATGACTACTGCTATGATGAAGCCGAAAAATACTCTCATGTAAGCCCTACTACAACAT  
GCCCTACTACAACCTCCTATTATACAGAAATGTAATGAAGGGCGAAGTCACTGCACAGATGACAACGATGA  
GTGTGAAGCCTTTATTTGTAATTGTGACCGCACGGCAGCCATCTGCTTCGCCAGAGCCTATTACAACAG  
ACGAACCTGGAATATCGACATCTGCTGCACGTTGCCAATGA

>GAHA01000030 Brachyurophis [Simoselaps] roperi PLA2-Bra-17 mRNA sequence  
ATGTATCCTGCTAACCTTATGATCCTGTTGGCAGTTTGTGTCTCCCTCTTAGGAGCCTCCGACATTCCCTC  
CGATGCCTCTCAACCTCCTACAATTCGGCAACATGATTAACGTGCCAACCGTGACAGTCGACCTTTGTT  
GGATTATGCGGACTACGGTTGCTACTGCGGCAAGGAGGTAGTGGGACACCGGTAGATGACTTGGATAGG  
TGCTGCCAGTACATGACTACTGCTATGATGAAGCCGAAAAATACTCTCATGTAATGATGCTGAGTG  
GCCCTACTACAACCTCCTATTATACAGAAATGTAATGAAGGGCGAAGTCACTGCACAGATGACAACGATGA  
GTGTGAAGCCTTTATTTGTAATTGTGACCGCACGGCAGCCATCTGCTTCGCCAGAGCCTATTACAACAG  
GCCAACCTGGGATATCAACATCACTGCACGTTGCCAATGA

>GAHA01000031 Brachyurophis [Simoselaps] roperi VEGF-Bra-1 mRNA sequence  
ATGAACTTTCTGCTCACTTGGATCCATTGCGGGTTGGCGGCACTGCTTTATTTCCACAACGCCAAGGTGT  
TGCAGGCTGCTCCTGCCCAAGAGGATGGAGAGAAGCAACAGATGAAGTTATCCCATTTATGACAGTCTT  
TGAGCGGAGTGCTCGAGGCCATTGAGACCATGGTAGATATTTACAGGAGTATCCTGATGAGGTGGAA  
TACATGTTCAAACCATCCTGTGTGCTCCTGATGAAATGTGGAGGATTTCTGTAATGACGAAGCGCTAGAA  
GTGTGCCCCACAGAGGTGTACATGTACAGCATGGAGATCATGAACTCAGACACTTTTCAGAGCCAGCATAT  
ACAACCTGATGAGCTTCCAGCAGCACAGTAAATGTCAA

>GAHB00000000.1|GAHB01000000 TSA: *Cacophis squamulosus*, transcriptome shotgun assembly, transcriptome shotgun assembly

>GAHB01000001 *Cacophis squamulosus* 3FTx-Cac-16 mRNA sequence  
ATGAAAACCTCTGCTGCTGACCTTGGTGGTGGTGACAATCGTGTGCCTGGACTTAGGTGACAGCTTGATAT  
GCTACGTGGGATATAATGCCCCCTCGGACTTGTCCAAATGGGCGAGAAGCTATGCTATAAAATTACTTCGTG  
TGTTGGTGTGTTGTCCTCAAGAGAGACAGCCAAATCGAAATGGGATGTGCTGCTACTTGCCCGATACGGAAC  
CGCGGTGTGAAAGTTATCTGTTGCTCAACAGACAGGTGCAACAAATTATCGAATTGGGAACGTCCTTGA

>GAHB01000002 *Cacophis squamulosus* 3FTx-Cac-18 mRNA sequence

ATGAAAACTCTGCTGCTGACCTTGGTGGTGGTGACAATCGTGTGCCTGGACTTAGGTGACAGCTTGATAT  
GCTACGTGGGATATAATGCCCTCGGACTTGTCCAAATGGGCAGAAGCTATGCTATAAAATTACTTTCGTG  
TGTGGTGTGTTGTCCCAAGAGAGACCAAGCAATCGAAATGGGATGTGCTGCTACTTGTCCCGATACGGAAC  
CGCGGTGTGAAAGTTATCTGTTGCTCAACAGACAGATGCAACAAATTATCGAATTGGGAACGTCCTTGA

>GAHB01000003 *Cacophis squamulosus* 3FTx-Cac-81 mRNA sequence  
ATGAAAACTCTGCTGCTGACCTTGGTGGTGGTGACAATCGTGTGCCTGGACTTAGTATACACCAGGACAT  
GTTGCAACCAACAGTCATCACAACTTAAACCACTATAGATTGTCCAAGTGGGGAGGACTCTTGCTATAA  
AAGCTCTTGGAGAGGTCAACATGGTTCTACGGTGAATGAGAAGTGAAAGGGGATGTGGTTGCCCCCAC  
GTGAAGAAAGGTATTACACTTACATGTTGCCAAACAGACGAATGCAACAATTAG

>GAHB01000004 *Cacophis squamulosus* 3FTx-Cac-139 mRNA sequence  
ATGAAAACTCTGCTGCTGACCTTGGTGGTGGTGACAATCGTGTGCCTGGACTTAGTATACACCAGGACAT  
GTTGCAACCAACAGTCATCACAACTTAAACCACTATAGATTGTCCAAGTGGGGAGGACTCTTGCTATAA  
AGGCTCTTGGAGAGGTCAACATGGTTCTACGGTGAATGAGAAGTGAAAGGGGATGTGGTTGCCCTCAC  
GTGAAGAAAGGTATTACACTTACATGTTGCCAAACAGACGAATGCAACAATTAG

>GAHB01000005 *Cacophis squamulosus* 3FTx-Cac-152 mRNA sequence  
ATGAAAACTCTGCTGCTGACCTTGGTGGTGGTGACAATCGTGTGCCTGGACTTAGTATACACCAGGACAT  
GTTGCAACCAACAGTCATCACAACTTAAACCACTATAGATTGTCCAAGTGGGGAGGACTCTTGCTATAA  
AAGCTCTTGGAGAGGTCAACATGGTTCTACGGTGAATGAGAAGTGAAAGGGGATGTGGTTGCCCTCAC  
GTGAAGAAAGGTATTACACTTACATGTTGCCAAACAGACGAATGCAACGATTAG

>GAHB01000006 *Cacophis squamulosus* 3FTx-Cac-180 mRNA sequence  
ATGAAAACTCTGCTGCTGACCTTGGTGGTGGTGACAATCGTGTGCCTGGACTTAGTATACACCAGGTCAT  
GTTGCAACCAACAGTCATCGCAACCTAAACCACTAAATGTTGTGAGGAGAACTCTTGCTATAAAAGAC  
TTGGAGTGATCACCCTGGAACATAAATTGAAAGGGGATGTGGTTGCCCTCACGTGAAGAAAGGTATTAA  
CTTACATGTTGCCAAACAGATGAATGCAACAATTAG

>GAHB01000007 *Cacophis squamulosus* 3FTx-Cac-182 mRNA sequence  
ATGAAAACTCTGCTGCTGACCTTGGTGGTGGTGACAATCGTGTGCCTGGACTTAGTATACACCAGGTCAT  
GTTGCAACCAACAGTCATCGCAACCTAAACCACTAAATGTTGTGAGGAGAACTCTTGCTATAAAAGAC  
TTGGAGTGATCACCCTGGAACATAAATTGAAAGGGGATGTGGTTGCCCTCACGTGAAGAAAGGTATTAA  
CTTACATGTTGCCAAACAGACGAATGCAACAATTAG

>GAHB01000008 *Cacophis squamulosus* 3FTx-Cac-203 mRNA sequence  
ATGAAAACTCTGCTGCTGACCTTGGTGGTGGTGACAATCGTGTGCCTGGACTTAGTATACACCAGGTCAT  
GTTGCAACCAACAGTCATCGCAACCTAAACCACTAAATGTTGTGAGGAGAACTCTTGCTATAAAAGAC  
TTGGAGTGATCACCCTGGAACATAAATTGAAAGGGGATGTGGTTGCCCTCACGTGAAGAAAGGTATTGCA  
CTTACATGTTGCCAAACAGACGAATGCAACAATTAG

>GAHB01000009 *Cacophis squamulosus* 3FTx-Cac-220 mRNA sequence  
ATGAAAACTCTGCTGCTGACCTTGGTGGTGGTGACAATCGTGTGCCTGGACTTAGGATACACCCTAGTAT  
GTCTCGGAGGTTCCGGTCTTATAAAGATGTGGTTTGTGCAAAAGACCAGACCACTTGTCTATCGATATAT  
TGTTTGGCCCAATTAAAGTCGTATGCTAATCATGAGGGGATGTACTTCTTCTTGCCCTGAAAGAAATAAT  
AATTTGTGTTGCGAGTACAGACCGGTGCAACAAGTAG

>GAHB01000010 *Cacophis squamulosus* 3FTx-Cac-225 mRNA sequence  
ATGAAAACTCTGCTGCTGACCTTGGTGGTGGTGACAATCGTGTGCCTGGACTTAGGATACACCCTAGTAT  
GTCTCGGAGGTTCCGGTCTTATAAAGATGTGGTTTGTGCAAAAGACCAGACCACTTGTCTATCGATATAT  
TGTTTGGCCCAATTAAAGTCGTGTTACAATCATGAGGGGATGTACTTCTTCTTGCCCTGAAAGAAATAAT  
CATGTGTGTTGCGAGTACAGACCGGTGCAACAAGTAG

>GAHB01000011 *Cacophis squamulosus* 3FTx-Cac-228 mRNA sequence  
ATGAAAACTCTGCTGCTGACCTTGGTGGTGGTGACAATCGTGTGCCTGGACTTAGGATACACCCTAGTAT  
GTCTCGGAGGTTCCGGTCTTATAAAGATGTGGTTTGTGCAAAAGACCAGACCACTTGTCTATCGATATAT  
TGTTTGGCCCAATTAAAGTCGTGTTACAATCATGAGGGGATGTACTTCTTCTTGCCCTGAAAGAAATAAT  
AATGTGTGTTGCGAGTACAGACCGGTGCAACAAGTAG

>GAHB01000012 *Cacophis squamulosus* 3FTx-Cac-236 mRNA sequence  
ATGAAAACTCTGCTGCTGACCTTGGTGGTGGTGACAATCGTGTGCCTGGACTTAGGATACACCCTAGTAT  
GTGTCGGAGGTTCCGGTTCTTATGAAGATGTGGTTTGTGAAAAACACCAGACCACTTGTCTATCGATATTC  
TGTTTGTCCATTTAGAGGTCTGTTTAATCATGAGGGGATGTAGTGCTTCTTGCCCTGGAGGAAATAAT  
CATGTGTGTTGCGAGTACAGACCGGTGCAACAAGTAG

>GAHB01000013 *Cacophis squamulosus* 3FTx-Cac-241 mRNA sequence  
ATGAAAACTCTGCTGCTGACCTTGGTGGTGGTGACAATCGTGTGCCTGGACTTAGGATACACCCTAGTAT  
GTGTCGGAGGTTCCGGTTCTTATGAAGATGTGGTTTGTGAAAAACACCAGACCACTTGTCTATCGATATTC  
TGTTTGTCCATTTAGAGGTCTGTTTAATCATGAGGGGATGTAGTGCTTCTTGCCCTGGAGGAAATAAT  
CATGTGTGTTGCGAGTACAGACCGGTGCAACAAGTAG

>GAHB01000014 *Cacophis squamulosus* CrISP-Cac-1 mRNA sequence  
ATGTTACAAATGGAATTCTCGTGCTGCTCAAAATGCAAAACGTGGGCAGATAGATGTTCTTTTA  
CTCACAGTCCATCACATTTAAGAACTGTGGGAAAAATTCGGTTGTGGTGAAAAATCTATTAATGTCAAGTCA  
ACCTTTTGCATGGAGTAGAGTAATTCAGTCTTGGTATGATGAAAACAAAAAATTCGTCTATGGCGTTGGA  
GCAAAGCCACAGGTTCTGTTATTGGCCATTATACCCAGATAGTTTGGTACAAAAGTCACCTTTGGTT  
GTGCTGCTGCCAGATGTTCTTCAACCAAAATACATCTACGTTTGTCAATACTGCCAGCAGGGAACATCAA  
AGGTTCAATTGCTACTCCATATAAATCAGGGCCACCTTGTGGGGACTGTCTTCGGCTTGTGTCAACGGA  
CTATGCACAAATCCTTGCAAAACATAACGATGACTTCTTGAACTGCAAACTTTAGCGAAAGAATCTAAAT  
GCCAGATGCATGGATCAAGTCAAAATGCCCTGCTTCTTGCTTCTGCCGCACTGAAATAGTATAA

>GAHB01000015 *Cacophis squamulosus* CVF-Cac-3 mRNA sequence  
ATGGTAGTGACTGAGCAAAGCGGCATTATGTTGTGATATCTCCCTATCAGATCTACTTCACAAAAACCC  
CCAAATATTTCAAGCCAGGAATGCCATAGAACTGACGGGTGATGTTACCAACCCCTGATGGCTCACCAGC  
TGCCAAATGTACAGTACATGAGAGGCATTCTTCTGAGGGAACCACTTTGAGCGATGGGACTGCTAAG  
CTCATCTGAACACACCCTGAACATTCAAAGCCTACCGATCACTGTTAGAACCAACCATGGAGACCTC

>GAHB01000016 *Cacophis squamulosus* KP-Cac-7 mRNA sequence  
ATGTCTTCCGGAGGTCTTCTTCTCTGCTGGGACTCCTCACCTCTGGGACGGGCTGACCCCTGTCTCCA  
GCAAGGACCGTCCAAAGTTCTGTGAACCTGCCTCGACAAAGGACCATGTAAGGGCTCGTTCCCTAGCCTT  
CCACTACCACCCAGTTCAACAGCAGTGCCGACAGTTTACTTATGGTGGATGCCAAGGGAATCCTAACAAAT

TTTAAGACCATAGAGGAATGCAAAAGCACCTGTGCTGCATGA

>GAHB01000017 *Cacophis squamulosus* KP-Cac-8 mRNA sequence

ATGTCCTCCGGAGGTCTTCTCTCTCTGCTGGGACTCCTCACCTCTGGGACGGGCTGACCCCTGTCTCCA  
GCAAGGACCGTCCCAAAGTTCTGTGAATGCCTCCTGACAAAGGACCATGTAAGGGCTCGTTCCTAGCCTT  
CCACTACCACCCAGTTCAACAGCAGTGCCGACAGTTTACTTATGGTGGATGCCAAGGAATCCTAACAAAT  
TTTAAGACCATAGAGGAATGCAAAAGCACCTGTGCTGCATGA

>GAHB01000018 *Cacophis squamulosus* KP-Cac-9 mRNA sequence

ATGTCCTCTGGAGGTCTTCTCTCTCTGCTGGGACTCCTCACCTCTGGGAGGGGCTGACCCCGTCTCCA  
GCAAGGACCGTCCCAAAGTTCTGTGAATGCCTCCTCATGACATCGGACCATGTAAGGCCAAGTTCCAGCCTT  
CTACTACGACCCAGTTTATCATATATGTGGAAGTTTACTTATGGTGGATGCCAAGGAATCCTAACAAAT  
TTTAAGACCATAGAGGAATGCAAAAGCACCTGTGCTGCATGA

>GAHB01000019 *Cacophis squamulosus* KP-Cac-10 mRNA sequence

ATGTCCTCCGGAGGTCTTCTCTCTCTGCTGGGACTCCTCACCTCTGGGAGGGGCTGACCCCTGTCTCCA  
GCAAGGACCGTCCCAAAGTTCTGTGAATGCCTCCTCATGACATCGGACCATGTAAGGGCTCGTTCCTAGCCTT  
CCACTACCACCCAGTTCAACAGCAGTGCCACAGTTTCTTTTATGGTGGATGCCAAGGAATCCTAACAAAT  
TTTGAGACCATAGAGGAATGCAAAAGCACCTGTGCTGCATGA

>GAHB01000020 *Cacophis squamulosus* KP-Cac-14 mRNA sequence

ATGTCCTCTGGAGGTCTTCTCTCTCTGCTGGGACTCCTCACCTCTGGGAGGGGCTGACCCCGTCTCCA  
GCAAGGACCGTCCCAAAGTTCTGTGAATGCCTCCTCATGACATCGGACCATGTAAGGGCTCGTTCCAGCCTT  
CTACTACGACCCAGTTTATCATATATGTGGAAGTTTACTTATGGTGGATGCCAAGGAATCCTAACAAAT  
TTTAAGACCATAGAGGAATGCAAAAGCACCTGTGCTGCATGA

>GAHB01000021 *Cacophis squamulosus* KP-Cac-20 mRNA sequence

ATGTCCTCTGGAGGTCTTCTCTCTGCTGCTGGGACTTCTCACCTCTGGGAGGGGCTGACTCCCGTCTCCA  
GCAAGGACCGTCCCAAAGTTCTGTGAATGCCTCCTCATGACATCGGACCATGTTATGGCTGGCTCCTAGCCTT  
CTACTACAATCCAGTTCAACATCAATGCCTACAGTTTATTTTATGGTGGATGCCAGGAATGCTAACTAT  
TTTAACACCATAGAGGAATGCAAAAGCACCTGTGCTGCATAA

>GAHB01000022 *Cacophis squamulosus* LP-Cac-4 mRNA sequence

ATGGGGCGATTCTCTTGGTGACCTTGAGCTTGCTGGTTGTGACTTTGTCCCTAAATGGAATTGGAGCTG  
ATCATATTGCCCTCGGGCTGGTCCCTTTTGAGACGTTTTTGCTACAAGTTTCATCAGAGAAAAGAAGAG  
CTGGAATGATGCCGAGGCCTCCTGCGTGCAACTTCAGAACAGCAGCCGCTGGTCTCCATCCACAGCGGA  
CGAGAGGCCCTTCACCTCAGAACGGTCATGCCCATTTGGCTCTTTGGTGATGTCTGGACTGGACTGAATG  
ACCCAGGAAAAAATCGCACCTGGAAGTGGAGTGACTCCGATTATGATTATACATCTGGGGATCATC  
GCAACCCGGCAATACGTACCGTGACAGTTCTGCGTTAAGATGACCCGTAGCATATTGAAGCTTGAGTGG  
AAAGCTACCACGTGTGAATCCAATCATTATTTTCATCTGCAAGATGTAG

>GAHB01000023 *Cacophis squamulosus* NP-Cac-2 mRNA sequence

ATGCTCGCCCTCTCCCGTCTGGCGGGCGGCGGGCTGCTGGTGCTGGCCCTGCTGCCTCTCGCCCTCGACG  
GGAAGCCGGCGCGCGCCTCAGGCGCTGCGCAAGGCTCCGGCGGGCGGCATGACGGCGTCCGGCGGGA  
GCTGACCGAGGAGCAGCAGCCGCCGCGCGGAGGAGTCGTGCGGTCCCGCGGCTGAGCGCAGCGGCTCC  
AAGGCGGCCAAGATAGAGCTGGACAAACGGCTGCTTCGGCGTCAGGCTCGACCGCATCGGCACCTCCAGCG  
GCCTGGGCTGCAAAAACCCCGTCGGAACAGTCCCGACGCCGACACCTGAGGGATCCTAA

>GAHB01000024 *Cacophis squamulosus* NP-Cac-4 mRNA sequence

ATGCTCGCCCTCTCCCGTCTGGCGGGCGGCGGGCTGCTGCTGCTGGCCCTGCTGCCTCTCGCCCTCGACG  
GGAAGCCGGCGCGCGCCTCAGGCGCTGCTTAAGGCTCCGGCGGGCGGCACGACGGCGTCCGGCGTGGGA  
GCTGACCGAGGAGCAGCAGCCGCCGCGCGGAGGAGTCGTGCGGTCCCGCGGCTGAGCGCAGCGGCTCC  
AAGGCGGCCAAGATAGAGCTGGACAAACGGCTGCTTCGGCGTCAGGCTCGACCGCATCGGTACCTCCAGCG  
GCCTGGGCTGCAAAAACCCCGTCGGAACAGTCCCGACGCCGACACCTGAGGGATCCTAA

>GAHB01000025 *Cacophis squamulosus* NP-Cac-5 mRNA sequence

ATGGTCGCCCTCTCCCGTCTGGCGGGCGGCGGGCTGCTGGTGCTGGCCCTGCTGCCTCTCGCCCTCGACG  
GGAAGCCGGCGCGCGCCTCAGGCGCTGCGCAAGGCTCCGGCGGGCGGCATGACGGCGTCCGGCGGGA  
GCTGACCGAGGAGCAGCAGCCGCCGCGCGGAGGAGTCGTGCGGTCCCGCGGCTGAGCGCAGCGGCTCC  
AAGGCGGCCAAGATAGAGCTGGACAAACGGCTGCTTCGGCGTCAGGCTCGACCGCATCGGCACCTCCAGCG  
GCCTGGGCTGCAAAAACCCCGTCGGAACAGTCCCGACGCCGACACCTGAGGGATCCTAA

>GAHB01000026 *Cacophis squamulosus* NP-Cac-3 mRNA sequence

ATGCTCGCCCTCTCCCGTCTGGCGGGCGGCGGGCTTCTGCTGCTGGCCCTGCTGCCTCTCGCCC  
TCGACGGGAAGCCGGCGCGCCTCAGGCGCTGCGCAAGGCTCCGGCGGGCGGCACGACGGCGTCCGG  
GCTGGAGCTGACCGAGGAGCAGCAGCCGCCGCGCGGAGGAGTCGTGCGGTCCCGCGGCTGAGCGCAGC  
GCCTCCAAGCGGCCAAGATAGAGCTGGACAAACGGCTGCTTCGGCGTCAGGCTCGACCGCATCGGCACCT  
CCAGCGGCTGGGCTGATAAAACCCCGTCGGAACAGTCCCGACGCCGACACCTGAGGGATCCTAA

>GAHB01000027 *Cacophis squamulosus* NGF-Cac-1 mRNA sequence

ATGTCCATGTGTGTACACTCTGATTATAGCATTTCTGATTGGCATATGGGCAGCACCAAAATCTGAAG  
ATAATGTCCCTCTGGGCTCCCTGTAAACATCTGACCTTTCTGACACCAAGCTGTGCTCAAACCTCACAAGGG  
TCTGAAAACATCTCGAAATACAGATCAGACCATCCTGCTCCTAAGAAGGCAGAGGATCAAGAACTTGGTA  
TCAGTAGCAAAACATCATTTGTGGATCCCAAGCTTTTTCAGAAGAGGCAGTTCCAGTCGTCTCGTGTCTGT  
TCAGCACTCAGCCCCACGTTGTCAAGAGATGAGCAAAGTGTGGAGTTCCTGGACAATGAAGATGTTCTT  
AAC

>GAHB01000028 *Cacophis squamulosus* PLA2-Cac-6 mRNA sequence

ATGTATCTGTCTCACCTTCTGTGCTCTTTGGCAGTTTGTGTCTCCATCTTAGGAGCCGTCACCATTCCTC  
CCCTGCCTCTCAACGTCATTAGTTCAAGAAATGATTCAATGTGCCAACCATGGCAGTCGACCTACACG  
GCATTATAGAACTACGGTTGCTTCTGCGGCTCAGGAGGTACGGGACACCGGTAGACGCCTTGGACATG  
TGCTGCAAAACATATGACATGCTATGGTGAAGCCGAAACACAGAGCTGCAACCCAGGTTGACAAAGT  
ATGATTACTACTGTGGCAAAGATGGACCCATCTGCAGTGTGAAAAAGAGTGTCAACGTTTGTGTGTGA  
TTGTGACGTACAGCAGCCAACCTGCTTTGCCAGAGCCCTTACAAAGATAGGAACTACAATATCAGCACC  
AAGGCACGTTGCCAATGA

>GAHB01000029 *Cacophis squamulosus* PLA2-Cac-12 mRNA sequence

ATGTATCTGTCTCACCTTCTGTGCTCTTTGGCAGTTTGTGTCTCCCTCTTAGGAGCCGCCACCATTCCTC  
CCCTGCCTCTCAACCTCGTACAATTAGCTACTTGTATTCAATGTGCCAACCATGGCAGTCGACCTACTTG  
GCGTTATATAGAACTACGGTTGCTACTGCGGCGCAGGAGGTTACGGGACACCGGTAGACGCCTTGGACATG  
TGCTGCAAAAGTACATGACGACTGCTATGGTGAAGCCGAAAAAAGGATGCGACCCCAAGTTGTTGGCGT

ATGATTACTACTGTGGCAGAGATGGACCCCTACTGCAGAAATATCAAAAAGAAGTGTCTACGTGTTGTGTG  
TGATTGTGACGTTGCAGCAGCCGAGTGCTTTGCCAGAACCCCTTACAACAGTAGGAACCTTCGCTATCAAC  
ATCAAATTACGTTGCATACCGATATATGAGAGGCTTCAGCGCTAG

>GAHB01000030 *Cacophis squamulosus* PLA2-Cac-16 mRNA sequence  
ATGTATCCTGCTCACCTTCTGGTCCTGTTGGCAGTTTGTGTCTCCCTCTTAGGAGCCGCCACCATTCCCTC  
CCCTGCCTCTCAACCTCTATCAGTTCGGCCGCTGATTCAATGTGCCATCCGCGGCAGTCGATATACTTG  
GGATTATATGGACTACGGTTGCTTCTGCGGCTCAGGAGGTACGCGGACACCGGTAGACGCCTTGGACATG  
TGCTGCAAAATACATGACGACTGCTATGGTGAAGCCGAAAAAAGAGTGCAGACCCCAAGTGGATGCCGT  
ATACTTGGGAATGTGACAACGATGTACCCATCTGCAGTGTGAAAAAGAAGTGTCAACGTTTGTGTGTGA  
TTGTGACGCCAAAGCAGCCATCTGCTTCGCGGAGCCCTTACAACAGGAGAAACAACCATGTCTGCCTC  
ACTGAACGTTGCCAATGA

>GAHB01000031 *Cacophis squamulosus* PLA2-Cac-18 mRNA sequence  
ATGTATCCTGCTCACCTTCTGGTCCTGTTGGCAGTTTGTGTCTCCCTCTTAGGAGCCGCCACCATTCCCTC  
CCCTGCCTCTCAACCTCTATCAGTTCGGCCGCTGATTCAATGTGCCATCCGCGGCAGTCGATATACTTG  
GGATTATATGGACTACGGTTGCTTCTGCGGCTCAGGAGGTACGCGGACACCGGTAGACGCCTTGGACATG  
TGCTGCAAAATACATGACGACTGCTATGGTGAAGCCGAAAAAAGAGTGCAGACCCCAAGTGGATGCCGT  
ATACTTGGGAATGTGACAGCGATGTACCCATCTGCATTTCAAAAACGGGGTGTGAAAGTTCGCGTGTGA  
TTGTGACGCCAAAGCAGCCATCTGCTTCGCGGAGCCCTTACAACAGGAGAAACAACCATGTCTGCCTC  
ACTGAACGTTGCCAATGA

>GAHB01000032 *Cacophis squamulosus* VEGF-Cac-1 mRNA sequence  
ATGAACCTTCTGCTCAGTTGGATCCATTGCGGGTGGCGGCGCTGCTTTATTTCACAACGCCAAGGTGT  
TGCAGGCTGCTCCTGCCCAAGAGGATGGAGAGAAGCAACAGATGAAGTTATCCATTATGACGGTCTT  
TGACCGAGTGCTCCTCAGCGCCATGGAGACCATGGTAGATATTTACCAGGAGTATCCTGATGAGGTGGAA  
TACATGTTCAAACCATCTGTGTGCTCCTGATGAAATGTGGAGGATTCTGTAATGACGAAGCGCTAGAAT  
GTGTGCCCACAGAGGTGTACAATGTGAGCATGGAGATCATGAACTCAGACACTTTCAGAGCCAGCATAT  
ACAACTGATGAGCTTCCAGCAGCACAGTAAATGTCAATGCAGACAAAAGAAACCAATGAGAATTAAACAA  
GAAATCACTGTGAACCTTGCTCAGAAAGGAGAAAGCACTTGTAACAACAAGATCCCTTGACCTGTAAAT  
GTTCTGCAAAATTCAGAGACTCAGTTGCAAGTGAAGCAGCTTGAGTTAAACGAGCGCACTTGCAGATG  
TGAAAAACCAAGCGGTGA

>GAHB01000033 *Cacophis squamulosus* WP-Cac-1 mRNA sequence  
ATGAAACCTTGGATTCTCCTGTTCCTAGCTGGTCTCCTCATCCTTTCAACTCAACTGGCAACAGCAAAGA  
CCACCAACAGCAGTTTCCCCCAAAGTCAAGCCGGCGAGTGTCCCAAGGTCAAATTGATCCTGAGCA  
TCCATGTAAACCAAGACTGTGCCTGCGACTCTGGATGCCAAGGAATAAGAAATGCTGCCAGTCGGATGC  
GCCAGAGAATGTTTTAGCCCAAGACCCCTCTGA

>GAHB01000033 *Cacophis squamulosus* KP-Cac-21 mRNA sequence  
ATGGTGTCTGGAGGTCTTCTTCTCCTGCTGGGACTCCTCACCTCTGGGCAGAGCTGACCCCGTCTCCG  
GCCAGACCGTCCAAGGTTTTTGTCTCTTCTGCTGACCCCGACCATGTAGAGCAAAATAACTCGCTT  
TTACTACAACCTCGGTTCAAACAATGTGAAAAGTTTATTTATGGCGGATGCCAGGGCAATGCCAACAAT  
TTTGAGACCAAAGATAGATGCCACTACACTGTGTGGAAAAACCTGGAGTGTGTCCTCCAGGCCCTCAAC  
AACAACAACAACAACAACTTCTCTGTCTCGAGAGGTGTCAACATGACTGGAATGTCTCTGGGAGCAGAA  
GTGTTGCCGCTACGGTTGCCTGTCTGAGTGCAAGGACATTGTCTATTCGATCCATGCATCAGCAACGAAG  
AGACCTCCCGGATTGGAACAACCTGTTTCGCACTGA

>GAHC00000000.1|GAHC01000000 **TSA: Denisonia devisi, transcriptome shotgun assembly, transcriptome shotgun assembly**

>GAHC01000001 *Denisonia devisi* 3FTx-Den-1 mRNA sequence  
ATGAAAACCTCTGCTGCTGACCTTGGTGGTGGTGACAATCGTGTGCCTGGACTTAGGTGACAGCTTCTCAT  
GCTACAAAACACCTGGTCTGGAATCTGAGGCTTGTGCACCTGGGGAGAACCCTATGCTATACAAGGACTTG  
GTGTGATGCTCGGTGGGCTCATGGGAAAGCGAATCGAACTGGGATGTGCTGCTACTTGCCCTACAGCG  
AAGACCGGCATCGATGTTATCTGTTGCTCAACAGACAATTGCAACCCACATCCGAAACGGAAACCTCATT  
GA

>GAHC01000002 *Denisonia devisi* 3FTx-Den-5 mRNA sequence  
ATGAAAACCTCTGCTGCTGACCTTGGTGGTGGTGACAATCGTGTGCCTGGACTTAGGTGACAGCTTCTCAT  
GCTACAAAACACCTGGTCTGGAATCTGAGGCTTGTGCACCTGGGGAGAACCCTATGCTATACAAGGACTTG  
GTGTGATGCTTGTGTTGTCGCTATGGCAAAGCGAATCGAACTGGGATGTGCTGCTACTTGCCCTGAAGGG  
AGGCCCCGCATCGATGTTACCTGTTGCTCAACAGACAATTGCAACCCACATCCGAAACGGAAACCTCATT  
GA

>GAHC01000003 *Denisonia devisi* 3FTx-Den-9 mRNA sequence  
ATGAAAACCTCTGCTGCTGACCTTGGTGGTGGTGACAATCGTGTGCCTGGACTTAGGTAAACAGCTTCTCAT  
GCTACAAAACACCTGATGTTAACTCTGAGCCTTGTGCACCTGGGGAGAACCCTATGCTATACAAGGACTTG  
GTGTGATGCTTGTGTTCCAGCAGAGGAAAGTAATCGAACTGGGATGTGCTGCTACTTGCCCTCCAGCG  
GAGCCAAAAAAGGATATTACCTGTTGCTCAACAGACAATTGCAACCCACATCCGGCAGACAAAATCTCGTT  
GA

>GAHC01000004 *Denisonia devisi* 3FTx-Den-15 mRNA sequence  
ATGAAAACCTCTGCTGCTGACCTTGGTGGTGGTGACAATCGTGTGCCTGGACTTAGGTGACAGCTTCTCAT  
GCTACAAAACACCTGATGTTAACTCTGAGCCTTGTGCACCTGGGGAGAACCCTATGCTATACAAGGACTTG  
GTGTGATGCTTGGTGGCGCAGCAGAGGAAAGCGAATCGAACTGGGATGTGCTGCTACTTGCCCTCCAGCG  
GAGCCAAAAAAGGATATTACCTGTTGCTCAACAGACAATTGCAACCCACATCCAGCAGACAACCTCTCGTT  
GA

>GAHC01000005 *Denisonia devisi* ACN-Den-1 mRNA sequence  
ATGCGTGGCGGTGGCCTTGGTGGCTCCAGCTTGCTCCTTTGCATCCTGTCTCCGTAGCAGTCTTGCCTG  
GCCGGGCAAGCGAGCTGAAAGTGTCCACGCAGATGGGCCTGGTGGCTGGCCTGAGCCTGCCGGTTCTCGA  
CGGCCACGCTCTCGGCTTCTTGGGCTCCCTTTGCGGAGCCTCCCGTGGGCAAGGATGCGCTTCTGCGC  
CCTGAGCCCGTCAAGCCCTGGCAGCATCCTGGACGCCACTTCTACCAGCGCGCCTGTTACAGGCGG  
TGGACAACAGCTACCCAGGCTTCCAGGGCACGGAGATGTGGAACCCCAACCGGGGCATGAGCGAGGACTG  
CCTCTACCTCAACATCTGGGTGCCCTCCCGCGTCCAGAGAGCTCCCGCTCCTGGTCTGATCTACGGA  
GGGGGCTTCTACAGCGCGCTGCCTCCTGGACGCTTACGATGGCGCTTCTGACCTACACAGAACG  
TTATCGTGGTCTCCCTCAGCTACCGCGTGGGGGCTTTCGGCTTTTGGGCTCCCGGGCAGTCCGGAGGC  
GCCGGGGAACATGGGGCTGCTGGACCAACGCTTGGCCCTGCAGTGGATCCAGAACACATCCATCATTTT  
GGGGCAATCCAGCGCGTCAACATCTTGGGGAGAGTGCCGGGGCCGCTCGTGGGCATGCACCTGC

TTTCCACCCAGAGCCGCGCCCTCTTCCAGCGGGCCATTCTGCAGAGCGGCGGCCCAACGCACCGTGGGC  
CACCGTCACGCCTGCCGAAAGCCGGCGCGGGCGGCCCTTCTGGGAAAGCAGCTGGGCTGCCAGTTCAAC  
AACGATTCCGAGCTGCTCAGTTGCTTGCCTCGAAACCCCGCAGGAGCTGATCGACGAGGAGTGGTCCG  
TCCTGCCCTACAAGAGCATTTTCCGCTTCCCTTTTCGTCCCGGTCATTGACGGGGACTTTTTTCCGGACAC  
CCCGAGGCCATGCTGAGTTCGGGCAACTTCAAAGAGACCCAGGTGTGCTGGGCGTGGTGAAGGACGAG  
GGCTCCTACTTTCTGATCTACGGGCTGCCCGGCTTCAGCAAGGACAACGAGAGCCTCATCAACCAGGCCG  
ACTTCTTGAAGGGGTGCGGATGAGCGTGCCCTACGCCAACGACATCGCCACCGAGGCCGTGGTGTGCA  
GTACACTGACTGGCAGGACCAAGGACAACGGGAGAAAGAACAGGGAGGCCCTGGACGACATCGTGGGAGAC  
CACAACGTCTATCGCCCGGTCTGTGAGTTCGCCAACGACTACGCCAAGCGCAACAACAGGTGTACGCCT  
ACCTCTTTGACCACCGGGCCTCCAACCTGCTCTGGCCTCCCTGGATCGGGGTCCCCACGGCTACGAGA  
TCGAGTTGTCTTTGATTGGCCCTCAACGACAGCCTGAACTACACACCCAGAGAAGGAGCTGAGCCG  
CAGGATGATRCGTACTGGGTCAACTTGYGCCGGACAGGGAACCCACCGACCTGCCGAGAAGGACGGG  
GCCTGGCCACCTACACCGCCTCCCGGCCGAGTATGTCCAGCTCAACACCCAGCCGTGGCCACCCAAC  
CCAGCCTGCGGGGCCAGATCTGCG

>GAHC01000006 Denisonia devisi CRiSP-Den-3 mRNA sequence  
ATGATTGCCTTCATTGTCTTGCTAAGTCTTGCTGCAGTGTGCAACAGTCTTCTGGAAGTGTGATTTTG  
CTTCTGTGTCAAGTAACAAAAAGAATCACCGAAAGGAGATTGTTGACAAGCACAATGCTTTAAGGAGATC  
AGTGAAACCAACTGCTAGGAACATGTTACAAATGAAATGGAATTCTCGTGTGCTCAAAACGCAAAACGT  
TGGGACAGATGATGTACTTTTGGCTCAGCTCCACAGGTACAGAAGTGTGGGAAAACTCCGTTGTGGTG  
AAAATATATTATGTCAACTCAACCTTTCCATGGAGTAGCGTAGTTTTCAGGCTTGGTATGATGAAGTCAA  
AAATTTCTGCTATGGCATTGGAGCAAAGCCACCAGGTTCTGTTATTGGCCATTATACCCAGGTAGTTTGG  
TACAAAAGTCACTTCTTGGTTGTGCTTCTGCGAAATGTTCTTCAACCAAAATACCTCTACGTTTGTCAAT  
ACTGCCCAGCAGGGAACATCAGAGGTTCAATTGCTACTCCATATAAATCAGGGCCAGCTTGTGCGGACTG  
TCCTTCAGCTTGTGTCAACGGACTATGCACAAATCCTTGCAAAATATAAGGATGACTTCTCGAACTGCAAA  
GCTTTAGCGAAAAAACTAAATGCCAGAGTCGATGGAATCAAGTCAAAATGCCCTGCTACTTGTCTTGCCA  
CAATAAAATAA

>GAHC01000007 Denisonia devisi cystatin-Den-1 mRNA sequence  
ATCCCCGGGGGCTTTCCCGAGATCCGTACGGATCCGGACGTGCAGGAAGCCGCCGAGTTCCGCCGTGC  
AAGAATACAACCGCGCTCAGCGCAACGCCTACTATTACAAGCAGTTGCGCATTGTGGAGGCGCAGTCCCA  
GGTAGTCTCAGGGGAGAAATATTATCTGACGATGGAGCTGATGAAAAMCCAAGTGTGCAAGACCAACCGG  
CAAGCCAAAGTGTACAAAGAGATCCAGAAGTGTGA

>GAHC01000008 Denisonia devisi KP-Den-3 mRNA sequence  
ATGTGCAAGATGTTTCTATATGGGGGTGTCTGTGGCAACAAGAACCACTATCTCTTTCGAAGAGCACTGCT  
GGAGCCAGTGCACAGGTGATGGAGAGATAACCAAAGAGCCAGGAGACGCAGGCGCCCCGCCCTTCCCTCCC  
TCTGAACCTTTCAGGTTCTCACACAGAGCTGTGGTCTTGGCGTCTTCTGGCCATCCTTGGTGA

>GAHC01000009 Denisonia devisi LAO-Den-1 mRNA sequence  
ATGAATGTCTTCATTATTTTCTCACTGCTGTTCTTGGCTGCCTTGGAAGCTGTGCAGATGACAGAAGAA  
GGCCCCTAGAAGAATGCTTCCGAGAAGCTGATTATGAAGAAATTTCTAGAGATCGCCAGGAATGGTTTGAA  
CAAGGCATCAAAACCAAAACATGTTGTGGTTGTAGGTGCAGGAATGGCCGGGCTTAGTGCAGCCTACGTT  
CTTGACAGAGGTGGACATAGGTGACGCTTCTTGAAGCTAGTAAACGTGTGGGAGGGCGAGTGAACACTT  
ATCGAAATGAACGGGAGGCTGGTATGTCAATCTGGGACCCATGCGTCTCCCTGAGAGACACAGGATTAT  
CCGGGAATATATCAAAAAATTTGGTCTCAAGTTGAATGAATTTCTTCAAGAAAATGAGAATGCCTGGTAT  
TTTATTAAAAACATCAGGAAGAGAGATGGGAAGTCAAGAAAGACCCCGGCTCTTCAAAATATCCTTTGG  
AGCCTTCAGAGAAGGCAAATCTGCTTCCAGCTATATCGAGAATCCCTCGAAAAGGTTATAGAAGAAAT  
GAAAAGGACTAACTGCAGCTACATACTAAATAAATATGACACCTACTCAACAAAGGAGTATCTAATTAAA  
GAAGGAAATCTGAGCCGCGGAGCTGTAGATATGATTGGAAGTTACTGAATGAAGATTTCTAGTATTACC  
TGTCTTTTATTGAGAGCCTGAAAGGTGATGATCTCTTCTCTTACGAAAAAAGATTTGATGAAATTTGTTGG  
TGGATTTGATCAATTGCCTAAATCCATGTATCAAGCCATTGCGAAAATGGTGCATTTAAATGCTCAAGTA  
ATCAAGATACAACATAATGCTGAGGAAGTCAGAGTGGCATCAAACTCCAGCAAAAGACCTTGTCTATCTG  
TGACAGCCGATTATGTCAATTGTATGTCCACATCAAGGGCCGCGCCGTGCGCATCTATTTTGAACCTCCCT  
TCCAGCAAAGAAAGCACAGCCTTTGCGGTCTATCCACTACAGAAGTGGCACCAGATCTTCTCTCACTTGC  
TCTAAGAAGTTTGGGAGGATGATGGCATTCATGGTGGGAAGTCCACAACAGATCTTCCATCTCGATTCA  
TCTACTACCTTAACCTAACTTTACTAGTGGCGTTGGAGTTATTGTGGCCTATACCTTGCTGATGATGC  
CGATTTCTTTCAAGCTCTTGATATCAAGACCAGTGTGATATTGTCTATTAATGACCTTTCATCTATCCAT  
CAGCTGCCAAGGAAGAGATCCAGGCCCTCTGCTACCCCTCAGTGATTAAWAAATGGAGCCTGGATAAAAT  
ATGCTATGGGTGCTATAACCTCTTCACTCCTTACCAGTTTCAAGATTTTGTGTAACAGTCGCTGTACC  
TGATGGCAGAACTACTTTGAGGGGAGTACACTGCCAGAGCTCATGGTTGGTTGGACAGCACAAATTAAG  
TCAGGGCTGACAGCAGCAAGAGATGTGAATCTGTGCTTCTCAGAAGCCATCAAGAATCCAGTGCATGATG  
ACAATCAACTTCAAGAAGGAGGTCAACACAAGGAGAATCCTAAACAGCCACTTCCCCATTCTGGCAACT  
TTCAGTGTTCAGACTAA

>GAHC01000010 Denisonia devisi LP-Den-2 mRNA sequence  
ATGGGGCATTCCCTCTTTGCGAGCCTCGGCTTGCTGCTGCTGGCTTTCTCCCTAAGTGAATTTGGAGCCA  
ATCGCTATTGTCCTTTGATTGGTTCTCCTACAATGAGTTTTGCTACAAGCTCTTCTACTTTCCGAAGAC  
CTGGGACGAAGCACAGAGGTTCTGTGTGGAACAGCAGGAAAACTCCCAACTTGCCCTCCATCAATGACGTG  
GGAGAATCAGTGAAGTTGCTCAACATCATCTCCAAAGATTGAAATTTCTTGTGTTTGGATGGGACTGA  
GGCTTTCAAAGAGAAAAAGGCATCTGGGAGTGGAGTGGCTTCCAACTCACTCACACATCCTGGAAAAGA  
AGGTGAACCCCAACCTTTTCAACAAGGAATTTCTGTGCTGTGCTGTGAGCTGAAACATGGTATCTCCAA  
TGGAACGATAAAAAGTGACAGCACAGCATCCATTTGTCTGCAAGTTCCAGCCCCGGAGTGAGGCAACCG  
GCTAA

>GAHC01000011 Denisonia devisi NP-Den-13 mRNA sequence  
ATGCTCGGCCCTCTCAGTCTGGCGGGCGGCGGGCTGCTGCTGCTGGTGTGCTGGCCCTGCTGCCTCTCGCCC  
TCGACGGGAAGCCGGCGCCGCTGCTGAGGCGCTGCCACGGCTCCGGCGGGCGGCATGAAGGCGTCGCG  
TCCGGTGTGACGGAGCAGCAGAGCAGCAACCAACAGCAGAAACAGCACCAGCATCCGCTCGCCGCGG  
ATGGAGGAGTGTGCGGTTCCCGGGCTGAGCGCAGCGGCTCCGAGACGGCCAAGATAGGGGACGGCTGCT  
TCGGCGTCCCGATCGACCACATCGGCAGCTCGAGCGGCATGGGCTGCGGAGGCGTCCCGAAACCTGCGCG  
ATCCTAA

>GAHC01000012 Denisonia devisi NP-Den-10 mRNA sequence  
ATGCTCGGCCCTCTCAGTCTGGCGGGCGGCGGGCTGCTGCTGCTGGTGTGCTGGCCCTGCTGCCTCTCGCCC  
TCGACGGGAAGCCGGCGCCGCTGCTGAGGCGCTGCCACGGCTCCGGCGGGCGGCATGAAGGCGTCGCG  
TCCGGTGTGACGGAGCAGCAGAGCAGCAAGCAACAGCAGAAACAGCACCAGCATCCGCTGCCCCCGG  
ATGGAGTGTGTCGGGTCCCGGGCTGAGCGCAGCGGCTCCGAGACGGCCAAGATAGGGGACGGCTGCT  
TCGGCGTCCCGATCGACCACATCGGCAGCTCGAGCGGCATGGGCTGCGGAGGCGTCCCGAAACCTGCGCG  
ATCCTAA

>GAHC01000013 Denisonia devisi NP-Den-9 mRNA sequence  
ATGCTCGGCCTCTCACGTCTGGCGGGCGGCGGGCTGCTGCTGCTGCTGCTGGCCCTGCTGCCTCTCGCCC  
TCGACGGGAAGCCGGCGCCGCTGTCCTGAGGCCTGCCACGGCTCCGGCGGGCGGCATGAAGCGTTCGCG  
TCCTTTGCTGACGGAGCAGCAGAAGCAGCAGAACCAACAGCAGAACCAGCACCAGCATCCGCTGCCGCCG  
CCGCCGATGGAGGAGTCGTCCGGTCCCGCGGCTGAGCGCAGCGGCTCCGAGACGGCCAAAGATAGGGGACG  
GCTGCTTCGGCGTCCCGATCGACCACATCGGCAGCTCGAGCGGCATGGGCTGCGGAGGCGTCCCGAAACC  
TGGCGGATCCTAA

>GAHC01000014 Denisonia devisi NP-Den-19 mRNA sequence  
ATGCTCGGCCTCTCACGTCTGGTGGGCGGCGGGCTGCTGCTGCTGGTCTGCTGCCTCTCGCCCTCGATG  
GGAAGCCGGCGCCGCTGTCCTCAGGCGCTGCCAAGGCTCCGGCGGGCGGCATAAAGGCGTCCGCTCCGGT  
GCTGACGGAGCAGCAGAAGCAGCAGAACCAACAGCAGAACCAGCACCAGCATCCGCTGCCGCCGCGCCG  
ATGGAGGAGTCGTCCGGTCCCGCGGCTGAGCGCAGCGGCTCCGAGACGGCCAAGATAGGGGACGGGTGCT  
TCGGCGTCCCGATCGACCACATCGGCAGCTCGAGCGGCATGGGCTGCGGAGGCGTCCCGAAACCTGGCGG  
ATCCTAA

>GAHC01000015 Denisonia devisi NGF-Den-2 mRNA sequence  
ATGATGTATAGCGTAATGTCCATGTTGTGCTACACTCTGATTATTGCAATTTCTGATTGGCATATGGGCAG  
CACCAAAATCTGAAGATAATGTCCTCTGGGCTCCCTGCAACCAGCTGTGCTCAAACCTCACGAGGGTCT  
GAAAACATCTCGAAATACAGATCAGCGCCTCTGCTCTCTAAGAAGGCAGAGGATCAAGAACTTGGATCA  
GTAGCAAACATCATTGTGGATCCCAAGCTTTTTCAGAAGAGGCGTTTCCAGTCACCTCGTGTCTGTTCA  
GCACTCAGCCCCCACCATTGTCAAGAGATGAGCAAAGTGTGGAGTTCTCGACAATGAAGATGCTCTTAA  
CAGGAATATCCGGGCCAAACCTGAAAAATCATCCTGTGCATAACCTAGGGGAACATTCTGTGTGTGACAGT  
ATCAGTGGCTGGGTAAACAAAACACAGCAACGGACATGTACGGCAATATGGTGACTGTGATGGCGGAGA  
TAAATCTTAATAATGAAGTCTATAAGCAGTACTTTTTTGAACCAAGTGCAGAAATCCAAATCCAAATCC  
ACTACTGTAGTGAGTGCAGGGCATTGATTCAGGCTTGGAAATTTCTATTGCACCAAGACAGACATTT  
GTCAGGCATTAAACCATGGCAGGCAATGTGACATCCTGGCGCTTCATTGCGATTGACACTGCCTGTGTGT  
GTGTAATCATTTAGAAAACTGACAACTTCTGA

>GAHC01000016 Denisonia devisi PLA2-Den-2 mRNA sequence  
ATGTATCCTGTTACCTTCTGGTCTGTTGGCAGTTTGTGTCTCCCTCTTAGGAGCCGTCAGCATTCCTC  
CGCGGCTCTGAACCTCTTACATTTCAAGGACATGATTGAATGTGCCAACCATGGCAGTCGAGGTGCATT  
GGATTATGCGGACTACGGTTGCTACTGCGGCAAGGAGGTAGCGGGACACCGGTAGATGAGTTGGATAGG  
TGCTGCCAAACACATGATGACTGCTATGGTGAAGCCGAAAACTCTCTGCATGTAATTACATGTTGAGTG  
GCCCCTACTACAACCTTTAAATACAGACTGTGTTGAACACCACTCACCTGCAAGATGACAAGGATGA  
GTGTAGAGCCTTTATTGTGAATTGTGACCGCACAGCAGCCATCTGCTTCGCCGGAGCCCTTACAACAAAC  
ACGAACTACAATATCGACACCAAGACACATTGCCAATGA

>GAHC01000017 Denisonia devisi PLA2-Den-9 mRNA sequence  
ATGTATCCTGCTACCTTCTGGTCTGTTGGCAGTTTGTGTCTCCCTCTTAGGAGCCCTCCGACATTCGTC  
CGCGGCTCTGAACCTCTGACATTTCAAGGACATGATTGAATGTGCCAACCATGGCAGTCGACCTACTCG  
GCATTATATGACTACGGGTGCTACTGCGGCTGGGGAGGTAGCGGGACACCGGTAGATGAGTTGGATGGG  
TGCTGCAAAACACATGACGACTGCTATGGTGAAGTCGAAAAAAGGATGCTACCCCAAGTTGTCTGTTCT  
ATAGTTGGAATGTACTGGAACCTGACCCACTGCGATTGAGAAACGGGTTGAAAGCTTCTGTGTGTCG  
TTGTGACGCCGCGAGCAGCCAAGTGCTTTTGCCAAAGCCCTTACAACACGCAAACTGGAATATCAACACT  
GACACACGTTTGCTAA

>GAHC01000018 Denisonia devisi PLA2-Den-12 mRNA sequence  
ATGTATCCTGCTACCTTCTGGTCTGTTGGCAGTTTGTGTCTCCCTCTTAGGAGCCGCCAACATTCCTC  
CGCAGCTCTGAACCTCTGACATTTCAAGTACTGATTTCAATGTGCCAACCATGGCAGTCGACCTACTCG  
GCATTATCTGACTACGGTTGCTACTGCGGCTCAGGAGGTAGCGGGACACCGGTAGATGAGTTGGATAGG  
TGCTGCCAAACACATGACGACTGCTATACTCAAGCCGGAACAAAGGATGCTACCCCAAGTTGTTGGCGT  
ATGATTACTACTGTGGCGAAATGGACCCCTACTGCGAGAAATATCAAAAGGAGTGTCAACGTTTGTGTG  
TGATTGTGACGTTGAAGCAGCCAAGTGCTTTTGCCAAAGCCCTTACAACGACGCGAACTGGAATATCGAC  
ACCACGAAACGTTGCAAAATGA

>GAHC01000019 Denisonia devisi SVMP-Den-9 mRNA sequence  
ATATCCGAAGCTCTCTTGGTAACTATGCTTCACGGTTTTTCCATATCAAGGGAGCTCTATCATCCTGG  
AATCCGGGAATGTTAATGATTATGAAGTAGTGTATCCACAAAAAGTGCTGCATTGCCCAAAGGAGGAGT  
TCAGAACTCCTCAGCCAGAGACCAAGTATGAAGATACAATGCAATATGAATTTACGTAATGGAGAGCCA  
GTGGTCTCTCACTTAGAAAGAAATAAAGGACTTTTTTCAGAAGATTACACTGAAACTCATTATGCCCTG  
ATGGCAGAGAAATTACAACAAGCCCTCCGGTTCAGGATCACTGCTATTACCATGGCTACATTGAAATGA  
AGCTGATTCAAGTGACGCCATCAGTGATGCAACGGCTTGAAGGACATTTCAAGCATCGAGGGGAGACA  
TACTTTATTGAGCCCTTGAAGCTTTCCGACAGTGAATCCCATGCAATCTACAAGATGAAATGTAGAAA  
AAGAGGATAAGATCCCCAAAATCTGTGGGTAACCCATACTACTTTGGAGTCGGAGGAGCCCATCGAAAA  
GATCTCTCAATTAACCTAATCTCCTGAACAAGACAGGTACTTGCAGGTCAAAAATACATTGAGTTGTAT  
ATAGTTGTGGAACAAGGAATGTACAAGAAATTACAGCAGCAACAGAGATGCTACAAAACTGGAGTATATG  
CAATGGTCAACACTTTAAATGTGATAGTACAGACCTTTGAATTTTTTTCATTGCACTGATTGGCCTAGAAA  
TTGGACCAACAAGATCAGATTAAAGATTGAACAAGACGCGAATGTCACTTTGAAATCATTGGAATGG  
AGAGAGAAAAATTTGCTGCCACGCAACGGAATGATAATGCTCAGTTACTTACGGGCATTGACTTCAATG  
GAAGGACTGTAGGACTTTGCTTACGTCCGCTCCCTCTGCATTCGACGCAATCTGTAGCAGTTATTAGAA  
TTATAGCAGACACAAGAATAATGGCATCTATAATGGCCCATGAGATGGGTATAATCTGGGCATTAAAT  
CATGACAGCGCTTCTGTAATTGCAATGTGACCATGCATTATGTCTGACACAGTAAGTAGTCAACCTG  
CCTATTGGTTGAGCTCTTGTAGTGTCAGGAACATCAGAGGTATCTTCTTAGAGTCAAACCACAATGCAT  
TCTCAACAAACCTTGTAGCAGATATGTTGCACGTCCAGTTTGTGGAAATTACTTTGTGGAGGTGGGA  
GAAGAAATGTGACTGTGCTCTCCTCAGGATTGTCAAAGTGTCTGCTGCAATGCTGCAACTTGTAACTGC  
AACATGAGGCACAGTGTGACTCCGGAGAGTGTGTGTAGCAATGCAAAATTAAGAAAGCAGGAGCAGAATG  
CCGGGACGCAAAAGGATGACTGTGACTTGCCTGAAAGCTGCACTGGCCAATCTGCTGAGTGTCCACGGAC  
CGCTTCCAGAGGAATGGACATCATGCCAAACAAGGGTACTGCTACAATGGGAATGCCCATCA  
TGACAAACCAAGTGTATTGCTCTCGGGGGACAGGTGTAATGTGTCTCCAGATATATGTTTTCCGTTGAA  
CAAGGATGGCCAAGGTTGTGGCTTCTGCAGAAATAGAAAATGGTAGAAGATTCCATGTGCAGCAAGGAT  
GTAAAGTGTGGCATGCTATATGCGAAAGGGAAAGGATACATGCACCTGCTTTATTTCAAGACATGACC  
CAGATTCTGGAATGGTTGAACCTGGAACAAATGTGGAGATGGAAAGGTGTGCATCAACAGGCAGTGTGT  
TGATGTGCAGACAGCCTACTGA

>GAHC01000020 Denisonia devisi VEGF-Den-1 mRNA sequence  
ATGAACTTTCTGCTCACTTGGATCCATTGCGGGTTGGCGGCGCTGCTTTATTTCACAAACGCCAAGGTGT  
TGCAGGCTGCTCTGCTGCCAAGGAGTGGAGAGAAGCAACCAAGAAGTTATCCCAATTATGACGGTCTT  
TGAGCGGAGTGCTGTCAGGCCCATTTGAGACCATGGTAGATATTTACCAGGAGTATCCCGATGAGGTGGAA  
TACATGTTCAAACCATCTGTGTGCTCCTGATGAAATGTGGAGGATTCTGTAATGACGAAGCGCTAGAAT  
GTGTGCCACAGAGGTGTACAATGTGACATGGAGATCATGAAACTCAGACACCTTCAGAGCCAGCATAT

ACAACTGATGAGCTTCCAGCAGCACAGTAAATGTCAATGCAGACAAAAGAAACCAATAAGAACTAAACAA  
GAAAACTACTGTGAACCTTGTCTCAGAAAGGAGAAAGCACTTGTACAAACAAGATCCCTTGACCTGTAAAT  
GTTCTTGCAAATTCACAGACTCACGTTGCAAGTCGAAGCAGCTTGAGTTAAACGAGCGCACTTGCAAGTG  
TGACAAACCGAGGCGGTGA

>GAHC01000021 Denisonia devisi WP-Den-30 mRNA sequence  
ATGCAGGCCAGATTCTCTCTCTGTTCACAGTGATCCTGTGGGATGATGGGGCTGTGATCTCCACTG  
GAATTGAGAAAGCCGGTCTCTGTCCAGATGTGAACATGCCCATCCCACCTCTGGGTATTTGCAGAACAC  
GTGTCAAACAGATTGCAACTGTCCAGACATCAAGAAGTGCTGCAAAAATGGCTGCGGGTTCATGACTTGT  
TCAACGCCCAAAGCCTGA

**>GAHD00000000.1|GAHD01000000 TSA: Echiopsis curta, transcriptome shotgun assembly, transcriptome shotgun assembly**

>GAHD01000001 Echiopsis curta 3FTx-Ech-9 mRNA sequence  
ATGAAAACCTCTGCTGCTGACCTTGGTGGTGGTGACAATCCTGTGCCTGGACTTAGGTAACAGCATGTCAT  
GCTACAAAACACCTGATGTTAAATCTGAGCCTTGTCCACCTGGGCAGAACCTATGCTATACAAAGACTTG  
GTGTGATGCTTTTTTGTTCATCAGAGGAAAGGTAATCGAACTGGGATGTGCTGCTACTTGCCTCCAGCG  
GAGCCAAGAAAGGATATTACCTGTTGCTCAACAAACAATTGCAACCCACATCCGGCACACAACCTCTCGTT  
GA

>GAHD01000002 Echiopsis curta 3FTx-Ech-12 mRNA sequence  
ATGAAAACCTCTGCTGCTGACCTTGGTGGTGGTGACAATCCTGTGCCTGGACTTAGGTAACAGCATGTCAT  
GCTACAAAACACCTGATGTTAAATCTGAGCCTTGTCCACCTGGGCAGAACCTATGCTATACAAAGACTTG  
GTGTGATGCTTTTTTGTTCATCAGAGGAAAGGTAATCGAACTGGGATGTGCTGCTACTTGCCTCCAGCG  
GAGCCAAGAAAGGATATTACCTGTTGCTCAACAAACAATTGCAACCCACATCCGGCACACAACCTCTCGTT  
GA

>GAHD01000003 Echiopsis curta 3FTx-Ech-21 mRNA sequence  
ATGAAAACCTCTGCTACTGACCTTGGTGGTGGTGACAATCGTGTGCCTGGACTTAGGTGACAGCTTGATAT  
GCTACAAAGGATATAATGCCCTCAGACTTGTCCACCTGGGCAGAACCTATGCTATACAAAGACTTGGTG  
TGATGCTTTTTTGTTCAGCAGAGGAAAGGTAGTCGAATTGGGATGTGCTGCTACTTGCCTACAGTGAAG  
CCCCATGTGGATATTAAGTGTGCTCAACAGACAAGTGCAACCCATTTCAGTACGTCCTAGATCACGTC  
CTTGA

>GAHD01000004 Echiopsis curta 3FTx-Ech-25 mRNA sequence  
ATGAAAACCTCTGCTGCTGACCTTGGTGGTGGTGACAATCGTGTGCCTGGACTTAGGTGACAGCTTGATAT  
GCTACAAAGGATATAATGCCCTCAGACTTGTCCACCTGGGCAGAACCTATGCTATACAAAGACTTGGTG  
TGATGCTTTTTTGTACAGCAGAGGAAAGGTAGTCGAATTGGGATGTGCTGCTACTTGCCTACAGTGAAG  
CCCCATGTGGATATTAAGTGTGCTCAACAGACAAGTGCAACCCATTTCAGTACGTCGTAGATCACGTC  
CTTGA

>GAHD01000005 Echiopsis curta 3FTx-Ech-35 mRNA sequence  
ATGAAAACCTCTGCTACTGACCTTGGTGGTGGTGACAATCGTGTGCCTGGACTTAGGTAACAGCATGTCAT  
GCTACAAAACACCTGGTGTAAATCTGAGCCTTGTCCACCTGGGCAGAACCTATGCTATACAAAGACTTG  
GTGTGATGCTTGGTGTACAGCAGAGGAAAGGTAGTCGAATTGGGATGTGCTGCTACTTGCCTATACCA  
AAGTCTATGAGGATATTAAGTGTGCTCAACAGACAATTGCAACACATTTCCACTACGTCCTAGATCAC  
GTCTCGAGGGTGTCTCTCATCCATCATGGACCATCCTTGA

>GAHD01000006 Echiopsis curta 3FTx-Ech-37 mRNA sequence  
ATGAAAACCTCTGCTACTGACCTTGGTGGTGGTGACAATCGTGTGCCTGGACTTAGGTAACAGCATGTCAT  
GCTACAAAACACCTGGTGTAAATCTGAGCCTTGTCCACCTGGGCAGAACCTATGCTATACAAAGACTTG  
GTGTGATGCTTGGTGTACCAGCAGAGGAAAGGTAGTCGAATTGGGATGTGCTGCTACTTGCCTATACCA  
AAGTCTATGAGGATATTAAGTGTGCTCAACAGACAATTGCAACACATTTCCACTACGTCCTAGATCAC  
AGCTCGAGGGTGTCTCTCATCCATCATGGACCATCCTTGA

>GAHD01000007 Echiopsis curta ACN-Ech-1 mRNA sequence  
ATGCCCTCCTGCCAGCCTGGCAAGATGCCTGCGCGTGGCCTTGGTGGCTCCAGCTTGTCTTTGCATCC  
TGTCTCCATAGCAGTCTTGCCTGGGCGGGCAAGCGAGCTGAAAGTGTCCACGCAGACGGGCTGGGTGCG  
TGGCCTGAGCCTGCGGCTCTTGACGCGCCACGTCTCGGCCTTCTGGGCATCCCCTTTGCGGAGCCTCCC  
GTGGGACGGCTGCGCTTCTGCGCCCTGAGCCTGTCAAGCCCTGGGCAGCAGCTCCTGGATGCTACTTCT  
ACCAGCGCGCTGTTACAGATGGTGACAACAGCTACCCAGGTTTCCAGGGCACGGAGATGTGGAACCC  
CAACCGAGGCATGAGCGAGGACTGCCCTCTACCTCAACATCTGGGTGCCCTCCC CGCGTCCCAGAGACGTC  
CCCGTCTCTGGTCTGGATCTACGGAGGGGATCTACAGCGCGCTGCCTCCCTGGACGCTTACAGATGGCC  
GTTTCTGTGACCTACACACAGAACGTCATCTTGGTCTCCCTCAGCTACCGCGTGGGGGCTTTCGGCTTTT  
GGGCTACCCGGGCGATCCGGAGGCACAGGGAACATGGGGCTGCTGGACAGCGCTTGGCCCTGCAATGG  
ATGCCAACAACATCAGTCAATTTTGGAGGCAATCCAGCGCGGTCAACATCTTTGGGAGAGTGCCTGGG  
GCCGCTCGGTGGGCGATGCACCTGCTTTCACCCAGAGCGCGCCCTCTTCCAGCGGGCCATTCTGCAGA  
GCGGCGGCCCAACACACCTGGGCGCCCTCACACCTGCGGAAAGCCGGCGCGGGCGGCTCTTCTGGG  
AAAGCAGCTGGGCTGCCAGTTCAACAACGATTCAGAGCTGGTCAAGTTGCTTGGCTTGAAACCCC

>GAHD01000008 Echiopsis curta CRiSP-Ech-1 mRNA sequence  
ATGATTGCCTTCATTGTCTTGTCTAAGTCTTGTGTCAGTGTCTGCAACAGTCTTCTGGCACTGTTGATTTTG  
CTTCTGAGTCAAGTAACAGAAAGATTACCGAAAGGAGATTGTTGACAAGCACAATGCTTTAAGGAGATC  
AGTGAACCAACTGCTAGGAACATGTTACAAATGAAATGGAATTCTCGTGTCTCAAATGCAAAACGT  
TGGGCAGATAGATGTACTTTTGTCTCAGTCCATCACATACAAGAACTGTGGGAAAACCTCCGTGTGGTG  
AAAATATATTATGTCAGTCAAGTCAACCTTTTGCATGGAGTGGAGTAGTTTCAAGCTTGGTATGATGAAGTCAA  
AAAATTCGTCTATGGCATTTGGAGCAAAAGCCACGAGGTCTCTGTTATTGGCCATTACACAGGTAGTTTGG  
TACAAAAGTCAACCTTCTTGGTGTGCTTCTGCCAAATGTTCTTCAACCAAATACCTCTACGTTTGTCAAT  
ACTGCCAGCAGGGAACATCAGAGGTTCAATTGCTACTCCATATAAAATCAGGGCCACCTTGTGGGAGCTG  
TCCTTCGGCTTGTGTCAACGGACTATGCACAAATCCTTGCAATATGAAGATGATTTCTCGAACTGCAAA  
GCTTTAGCGAAAACTCTAAATGCCAGACTGCATGGATCAAGTCAAAATGCCCTTCTGCTTGTCTTCTGCC  
ACAATAAAATAATATAG

>GAHD01000009 Echiopsis curta KP-Ech-8 mRNA sequence  
ATGATTGCCTTCATTGTCTTGTCTAAGTCTTGTGTCAGTGTCTGCAACAGTCTTCTGGCACTGTTGATTTTG  
CTTCTGAGTCAAGTAACAGAAAGATTACCGAAAGGAGATTGTTGACAAGCACAATGCTTTAAGGAGATC  
AGTGAACCAACTGCTAGGAACATGTTACAAATGAAATGGAATTCTCGTGTCTCAAATGCAAAACGT  
TGGGCAGATAGATGTACTTTTGTCTCAGTCCATCACATACAAGAACTGTGGGAAAACCTCCGTGTGGTG  
AAAATATATTATGTCAGTCAACCTTTTGCATGGAGTGGAGTAGTTTCAAGCTTGGTATGATGAAGTCAA

AAAATTCGTCTATGGCATTGGAGCAAAGCCACGAGGTTCTGTTATTGGCCATTATACCCAGGTAGTTTGG  
TACAAAAGTCACTTCTTGGTTGTGCTTCTGCCAAATGTTCTTCAACCAAATACCTCTACGTTTGTCAAT  
ACTGCCCAGCAGGGAACATCAGAGGTTCAATTGCTACTCCATATAAATCAGGGCCACCTTGTGGGGACTG  
TCCTTCGGCTTGTGTCAACGGACTATGCACAAATCCTTGCAAATATGAAGATGATTTCTCGAACTGCAAA  
GCTTTAGCGAAAAACTCTAAATGCCAGACTGCATGGATCAAGTCAAAATGCGCTTCTGCTTGTCTTGCC  
ACAATAAAATAATATAG

>GAHD01000010 Echiopsis curta KP-Ech-3 mRNA sequence  
ATGTGCCAGGAATTCAATTTTTGGAGGTTGCAAAGGCAATGCCAAACAACTTCGTCTCCAAACAGGACTGCT  
TCCAGACGTGTATCAGAGGAGGGGCTGCAGAGGCAACGGTGGTACCTAGCGGGCCAGCCACTGAAGTGGC  
TACACTAAGAGCTGGACATCTCCAGAGGCCCTACGAAAAACAGGCCCTGGCTTCAGAGAATTCTGTGCTGCG  
CCCCGGGTGGTAGGTCCTGCGGGGCTCCTTCTCCTCGTTGGTACTTCGACCTAGAGAGCCGGACGTGCA  
AGATGTTTCGTCTATGGGGGCTGTCGTGGCAACAAGAACATATCTCTTGAAGAGCACTGCTGGAGCCA  
GTGCACAGGTGATGGAGAGATAACTGAAGAGCCAGGAGATGCAGGCGCCAGCCTCCCTCCCTCCGAA  
CCCTTCAGCTTCTCCACCAGAGCTGTGGTCCCTTGCTGTCCTTCTGGCCATCCTGGTGAATCTCTGCTGG  
GCTCGATGGGGGTTTTCTTGTTAAGATCTGCCGGAAGAACCCNGTTGTCACTGGGAACAGTGTGGAGCA  
CGCTGGATGA

>GAHD01000011 Echiopsis curta KP-Ech-4 mRNA sequence  
ATGTCTTCTGGAGGTTCTTCTCCTGCTGGGACTCCTCACCTCTGGGAGGTGCTGACCCCCGTCTCCA  
GCAAGGACCGTCCACACTTCTGTCATGTCCTTATGATACCGGACCATGTAAGCCAGGTTTCATAGCCTT  
CTACTACAACCTCAGTTCAACGTAAATGCCTAGAGTTTGTTTATGGTGGATGCGAAGGGAATGCTAACAAAT  
TTTAAGACCATAGATGCATGCAACGCACCTGTGCTGCATGA

>GAHD01000012 Echiopsis curta LAO-Ech-1 mRNA sequence  
CCCCTAGAAGAAATGCTTCCAAGAAGCTGATTATGAAGAATTTCTAGAGATCGCCAGGAATGGTTTGAACA  
AAACATCAAAACCCAAACATGTTGTGTTGTAGGTGCAGGAATGGCTGGGCTTAGTGACGCTATGTTCT  
TGCAGGAGCTAGACATAAGGTGACGCTTCTTGAAGCTAGTGAACGTGTGGGAGGACGAGTGAACACTTAT  
CGAAATGAAACGGAAGGCTGGTATGTCAATCTGGGACCCATGCGTCTCCCTGAGAGACACAGGATTATCC  
GGGAATATATCAGAAATTTGGTCTCAAGTTGAATGAATTTCTTCAGGAAAATGAGAATGCCTGGTATTT  
TATTA AAAACATCAGGAAGAGATATGGGAAGTCAAGAAAGACCCCGGCGTCTTCAATATCCTTTGAAG  
CCCTCAGAAAGAGCCGAAATCTGCTTACAGCTATATCGAGAAATCCCTCGAAAAGGTTATGGAAGAAATGA  
AAAGGACTAGCTGCAGCTATATACTAAATAAATATGACACCTACTCAACAAAGGAGTATCTAATTAAGA  
AGGAAATCTGAGCCGCGGAGCTGTAGATATGATTGGAAGTTACTGAATGAAGATTCTAGCTATTACCTG  
TCTTTATTGAGAGCTGAAAGCTGGTATGTCAATCTGGGACCCATGCGTCTCCCTGAGAGACACAGGATTATCC  
GATTTGATCAATTGCTATATCCATGTATCAAGCCATGCGCAAAATGGTGCATTTAAATGCTCAAGTAAT  
CAAGATACAACAATGCTGAGGAAGTCAGAGTGACATATCAAACTCCAGAAAATACCTTGTCTATGTG  
ACAGCCGATTATGTCTATTGTATGTCTCCACATCAAGGGCCACCGCTGCGATCTATTTTGAACCTCCCTTC  
CACCAAGAAAGCACACGCTTTGCGGTCTATCCACTACAGAAGTGGCACCAGATCTTCTCACTTGAC  
TAGGAAGTTTTGGGAGGCTGATGGCATTCTGGTGGGAAGTCCACAACCTGATCTTCCATCTCGATTCTATC  
TACTACCTTAACCTAACTTACTGCTTGGCGTGGAGTTATGTGGCCATATACCTTGTGATGATGCGG  
ATTTCTTTCAAGCTCTTGATATCAAGACCAAGTGTGATATTGTCAATTAATGACCTTTCACTCATCCATCA  
GCTGCCCAAGGAAGAGATCCAGGCCCTCTGCTACCCCTCAATGATTAAAAAATGGAGCCTGGATAAATAT  
GCTATTGGGTGCTATAACCTCTTCACTCCTTACCAGTTTCAAGATTTTATTGAAACAGTCTGCTGCACCTG  
TAGGCAGAATCTACTTTGCAGGGGAGTACACTGCCAGAGTTTATGGTTGGTTGGACAGCACAAATTAAGTC  
AGGGCTGACAGCAGCAAGAGATGTGAATCGTGCTTCTCGGAAGCCATCAAGAAATCCAGCTGATCAGTGAC  
AATCAACTTCAAGAAGGAGGTCAACACAAGGAGAATCTTAACACAGCCACTTTGCCCATTTCTGGCAACTTC  
TAGGTTTTTTCAGACTAA

>GAHD01000013 Echiopsis curta LP-Ech-1 mRNA sequence  
ATGGCGCAATTCATCGTCGTGAGCTTACCTTGCTGGTCGTGGCCCTCTCCTTAAGGGGAACCTGGAGCTG  
ATCACCATTTGCTCCTAGCGGTTGGGCTCCTATAATGAGTTTTGCTACATGGTCCACAACAGATCCGTCAC  
CTGGAACAATGCCAGAGAGATTCTGCTGCAGCAAGAGACAAACTGCCACCTCCCTCCATCCATAGCAAG  
CCAGAGGCAGCCTTTCATCGTCAGGCTGGTCTACCACAGGGCCAGCGCCGGGTCCAGTGTCTGGATCGGAT  
TGAACGATCCAGAGAAAAGACGCACCTGGCAATGGAGTGATGGCTCTAGCATAAAGTACAGATCCTGGAT  
GCCAGGAGAGCCCAACAACCTATGCAAAACAAGAGTATTTGTGTTGTGCTGTCAGCCTGGTCACTGTTATGTC  
GGATGGAACGATCAGGACTGTGGGTCCAGGCATAACTTTGTCTGCAAGTTCCAGCCAAAGGACCGAGACGA  
ACACCGTCAATGTTGCAAAACAGGAAGTAA

>GAHD01000014 Echiopsis curta NP-Ech-33 mRNA sequence  
ATGCTCGGCCCTCTCACGTCTGGCGGGCGGCGGGCTGCTATTAGTGGTGTGCTGGCCCTGCTGCCTCTCGCCC  
TCGACGGGAAGCCGACGGCGCGCCCTCAGGCCTGCCACGGCTCCGGCGGGCGGCATGATGGCGTTCGCG  
GCCGATGCTGACGGAGAAGCAGAGGCAGCAGCACCAGCAGCCGCTGCCGCGGACGATGGAGGAGTCTCTCG  
GGTCCCGCGGCTGAGCGCAGCGGCTCCAAGACGGCCAAGATAGGGAACGGCTGCTTCAGCTTCCCGCTCG  
ACCGCATCGGCAGCGTGAGCGGCATGGGCTGCAGAACCTTCCGGAAGCCGACACCTGGCGGGTCTCTAA

>GAHD01000015 Echiopsis curta NP-Ech-34 mRNA sequence  
ATGCTCGGCCCTCTCACGTCTGGCGGGCGGCGGGCTGCTATTAGTGGTGTGCTGGCCCTGCTGCCTCTCGCCC  
TCGACGGGAAGCCGACGGCGCGCCCTCAGGCCTGCCACGGCTCCGGCGGGCGGCATGATGGCGTTCGCG  
GCCGATGCTGACGGAGAAGCAGAGGCAGCAGCACCAGCAGCCGCTGCCGCGGACGATGGAGGAGTCTCTCG  
GGTCCCGCGGCTGAGCGCAGCGGCTCCAAGACGGCCAAGATAGGGAACGGCTGCTTCAGCTTCCCGCTCG  
ACCGCATCGGCAGCGTGAGCGGCATGGGCTGCAGAACCTTCCGGAAGCCGACACCTGGCGGGTCTCTAA

>GAHD01000016 Echiopsis curta NP-Ech-35 mRNA sequence  
ATGCTCGGCCCTCTCACGTCTGGCGGGCGGCGGGCTGCTATTAGTGGTGTGCTGGCCCTGCTGCCTCTCGCCC  
TCGACGGGAAGCCGACGGCGCGCCCTCAGGCCTGCCACGGCTCCGGCGGGCGGCATGATGGCGTTCGCG  
GCCGATGCTGACGGAGAAGCAGAGGCAGCAGCACCAGCAGCCGCTGCCGCGGACGATGGAGGAGTCTCTCG  
GGTCCCGCGGCTGAGCGCAGCGGCTCCAAGACGGCCAAGATAGGGAACGGCTGCTTCAGCTTCCCGCTCG  
ACCGCATCGGCAGCGTGAGCGGCATGGGCTGCAGAACCTTCCGGAAGCCGACACCTGGCGGGTCTCTAA

>GAHD01000017 Echiopsis curta NP-Ech-36 mRNA sequence  
ATGCTCGGCCCTCTCACGTCTGGCGGGCGGCGGGCTGCTATTAGTGGTGTGCTGGCCCTGCTGCCTCTCGCCC  
TCGACGGGAAGCCGACGGCGCGCCCTCAGGCCTGCCACGGCTCCGGCGGGCGGCATGATGGCGTTCGCG  
GCCGATGCTGACGGAGCAGCAGGACGAGCAGCACCAGCAGCCGCTGCCGCGGACGATGGAGGAGTCTCTCG  
GGTCCCGCGGCTGAGCGCAGCGGCTCCAAGACGGCCAAGATAGGGAACGGCTGCTTCAGCTTCCCGCTCG  
ACCGCATCGGCAGCAGCAGCGGCATGGGCTGCAGAACCTTCCGGAAGCCGACACCTGGCGGGTCTCTAA

>GAHD01000018 Echiopsis curta NP-Ech-37 mRNA sequence  
ATGCTCGGCCCTCTCACGTCTGGCGGGCGGCGGGCTGCTATTAGTGGTGTGCTGGCCCTGCTGCCTCTCGCCC  
TCGACGGGAAGCCGACGGCGCGCCCTCAGGCCTGCCACGGCTCCGGCGGGCGGCATGATGGCGTTCGCG  
GCCGATGCTGACGGAGAAGCAGAGGCAGCAGCATCAGCACCAGCAGCCGCGGACGATGGAGGAGTCTCTCG

>GAHD01000019 *Echiopsis curta* NP-Ech-38 mRNA sequence  
ATGCTCGGCCTCTCACTGCTGGCGGGCGCGGGCTGCTATTGGTGGTGGCTGGCCCTGCTCGCCCTCGCC  
TCGACGGGAAGCGACAGCGCGCGCTCAGCGCTGCCCACGCGCTCCGCGCGCGGATGATGGCGTCCGCG  
GCCGATGCTGACGGAGCAGCAGAGGCAGCAGCACACGACACAGCAGCCGCCGACGATGGAGGAGTCTCTCG  
GGTCCCGCGGCTGAGCGCAGCGCGCTCCAAAGACGCCAAGATCGCGCAGCGCTGCTTCGCGCTCCCGCTCG  
ACCGCATCGGCAGCAGCAGCGGATGGCTGCGGAAGCTGCCGAGACCGACACTTGGCGGGTCTCTAA

>GAHD01000020 *Echiopsis curta* NP-Ech-39 mRNA sequence  
ATGCTCGGCCTCTCACGTCTGCGGGCGCGGGCGTGTCTTGGTGGTCTGGCCCTCGCCCTCGCCCTCGACGCGGAGCGCGCTGCGCGCCCGCTCAGCGCTGCCACAGGCTCTCGCGCGCGGCATGATGGCGTCGCGGCCGATGCTGACGGAGAAGCAGAGGCAGCAGCATCAGCACCAGCAGCCGCCGACGATGGAGGAGTCTCTCGGGTCCCGCGGCTGAGCGCAGCGCGCTCCAAAGACGGCAAGATCGGGGACGGCTGCTTTCGGCTCCCGCTCGCACCGCATCGGCAGCAGCGCATGGCGTGCAGGAGCTGCCGAGCGACGACCTGGCGCGGTCTCTTAA

>GAHD01000021 *Echiopsis curta* NP-Ech-46 mRNA sequence  
ATGCTCGGCCCTCTCACGTCTGCGGGCGCGGGCGTCTATGGTGGTGTGGCCCTGTGCTCTCGCCC  
TCGACGGGAAGCGACGCGCGCGCTCAGGCGCTGCCACAGGCTCTCGGCGGCGGATGATGGCGTCGCG  
GCCGATGCTGACGGAGCAGCAGAGGCAGCAGCACAGCACCAGCAGCCGCCGACGATGGAGGAGTCTCTCG  
GGTCCCGCGGCTGAGCGCAGCGGCTCCAAAGCGCCAAAGATCGGGGACGGCTGCTTCGCCCTCCGCGCTCG  
ACCGCATCGGCAGCAGCAGCGCATGGCTGCGGAAGCTGCCGAGCGACACCTGGGCGGTCCTAA

>GAHD01000022 *Echiopsis curta* NP-Ech-47 mRNA sequence  
ATGCTCGGCCTCTCACTGCTGGCGGGCGGGCGGCTGCTTGGTGGTGGCTGGCCCTCGCCCTCGCCG  
TCGACGGGAAGCCAGCAGCGCCGCTCAGCGCTGCCATCAGGCTCTCCGCGCGCGGATGATGGCGTCGCG  
GCCGATGCTGACGGAGCAGCAGAGGCAGCAGCACACGACACAGCAGCCGCCGACGATGGAGGAGTCTCTCG  
GGTCCCGCGGCTGAGCGCAGCGGCTCCAAAGCAGCAAGATCGGGGACGGCTGCTTCGCGCTCCGCGCTCG  
ACCGCATCGGACAGCAGCGGATGGGCTGCGGAAGCTGCCGAGCGACACCTGGCGGGTCTCTAA

>GAHD01000023 *Echiopsis curta* NP-Ech-48 mRNA sequence  
ATGCTCGGCCTCTACAGTCTGGGCGGGCGCGGCTGCTATGGTGGTGCTGGCCCTCTCGCCC  
TCGACGGGAAGCCGACGGCGCGGCTCAGGCGTGCCTCCGCGGCGGATGATGGCGTCGCG  
GCCGATGCTGACGGAGCAGCAGAGGCAGCAGCACCAGCACCAGCAGCCGCCGACGATGGAGGAGTCTCTG  
GGTCCCGCGGCTGAGCGCAGCGGCTCCAAAGACCGCAAGATCGGGGACGGCTGCTTCGCGCTCCCGCTCG  
ACCGCATCGGCAGCAGCAGCGCATGGGCTGCGGAAGCTGCCGGAAGCCGACACCTGGCGGGTCTCTAA

>GAHD01000024 *Echiopsis curta* NP-Ech-50 mRNA sequence  
ATGCTCGGCCTCTACGTTCTGGCGGGGCGGGCTGCTATGGTGGTGCTGGCCGCTCGGCC  
TCGACGGGAAGCCGACGGCGCGCTCAGGCGTGCACCGCTCGGCCGCGGCATGATGGCGTCGCG  
GCCGATGCTGACGGAGAAGCAGAGGCAGCAGCACCAGCAGCCGCCGACGATGGAGGAGTCTCTGGGTCCC  
GCGGCTGAGCGCAGCGGCTCAAGACGGCCAGATACGGGAGCGGTGCTTCGGCTCTCCGCTCAGCCGCA  
TCGGCAGCAGCAGCGGCGATGGGCTGCGGAAGCGTCCCGAAGCCGACACCTGGCGGGTCTCTAA

>GAHD01000025 *Echiopsis curta* NP-Ech-51 mRNA sequence  
ATGCTCGGCCTCTACAGTCTGGCGGGCGCGGCTGCTATTGGTGGTCTGGCCCTGCGCCCTCGCCCTCG  
TCGACGGGAAGCCGACGGCGCGCTCAGGCGTGCCACCGGCTCCGGCGGGCGCATGATGGCGTCGCG  
GCCGATGCTGACGGAGCAGCAGAGGCAGCAGCACCAGCACCAGCAGCCGCCGACGATGGAGGAGTCTCTG  
GGTCCCGCGGCTGAGCGCAGCGGCTCCAAAGACGCCAAGATCGGGGACGGCTGTTCTCGGCCTCCGCGCTCG  
ACCGCATTCGGCAGCAGCAGCGCATGGGCTGCGGAAGCTGCCGAGCCGACACCTGGCGGGTCTCTAA

>GAHD01000026 *Echiopsis curta* NP-Ech-52 mRNA sequence  
ATGCTCGGCCTCTACAGTCTGGCGGGGCGGGCTGCTATAGTGGTGCTGGCCCTCTCGCCC  
TCGACGGGAAGCCGACGGCGCGCTCAGGCGTGCCACGCGTCCGGCGGCGCATGATGGCGTCGCG  
GCCGATGCTGACGGAGAAGCAGAGGCGAGCAGCACAGCAGCCGCTGCGCGCCGACGATGGAGGAGTCTCTG  
GGTCCCGCGCTGAGCGCAGCGGCTCCAAGACGGCCAAAGATAGGGAACGGCTGCTTCGGCTTCCGGCTCG  
ACCGCATCGGCAGCTGAGCGGATGGGCTGCAAGCACTTCCCGAAGCCGACACTTGGCGGGTCTCTAA

>GAHD01000027 *Echiopsis curta* NP-Ech-56 mRNA sequence  
ATGCTCGGCCTCTACAGTCTGCGGGGCGGGCTGCTTGGTGGTCTGGCCGCTCGCCCC  
TCGACGGGAAGCCGACGGCGCGCTCAGCGCTGCCACCGGCTCCGGCGGGCGGATGATGGCGTCGCG  
GCCGATGCTGACGGAGCAGCAGAGGCAGCAGCACCAGCACCAGCAGCCGCCGACGATGGAGGAGTCTCTG  
GGTCCCGCGGCTGAGCGCAGCGGCTCCAAAGCGGCCAAGATCGGGGACGGCTGCTTCGCGCTCCCGCTCG  
ACCGCATCGGCAGCAGCAGCGCATGGGCTGCGCGAAGCTGCCCGAAGCCGACACTTGGCGGGTCTCTAA

>GAHD01000028 *Echiopsis curta* NP-Ech-61 mRNA sequence  
ATGCTCGGCCTCTACGCTGTGGCGGGCGGGCTGCTATTGGTGGTGTGCTGGCCCTCGCCCC  
TCGACGGGAAGCCGACGGCGCGCCTCAGGCGCTGCCACCGGCTCCGGCGGGCGCATGATGGCGTCGCG  
GCCGATGCTGACGGAGCAGCAGAGGCAGCAGCACCGACACCAGCAGCCGCCGACGATGGAGGAGTCTCTCG  
GGTCCCGCGGCTGAGCGCAGCGGCTCCAAAGACCGCAAGATCGGGGACGGCTGCTTCGGCCTCCGCGCTCG  
ACCGCATTCGGCAGCAGAGCGCATGGGCTCGCGAAGCTGCCGAGCGACACCTGGCGGGTCTCTAA

>GAHD01000029 *Echiopsis curta* NP-Ech-64 mRNA sequence  
ATGCTCGGCCTCTACGTTCTGGCGGGGCGGGCTGCTATTGGTGGTCTGGCCGCTCTCGCCC  
TCGACGGGAAGCCGACGGCGCGCTCAGGCGTGCCACCGGCTCCGGCGGGCGCATGATGGCGTCGCG  
GCCGATGCTGACGGAGCAGCAGAGGCAGCAGCACCAGCACCAGCAGCCGCCGACGATGGAGGAGTCTTG  
GTCCCGCGGCTGAGCGCAGCGGCTCCAAGCGCCCAAGATCGGGGACGGCTGCTTCGCGCTCCGCGCTCG  
ACCGCATTCGGCAGCAGCAGCGCATGGGCTGAGCGAAGCGTCCCGAAGCCGACACCTGGCGGGTCTCTAA

>GAHD01000030 *Echiopsis curta* NP-Ech-70 mRNA sequence  
ATGCTCGGCCTCTACAGTCTGGCGGGGCGGGGTGCTATTGGTGGTCTGGCCCTCTCGCCC  
TCGACGGGAAGCCGACGGCGCGCTCAGGCGTGCCTACGCGCTCCGGCGGCGGCATGATGGCGTCGCG  
GCCGATGCTGACGGAGCAGCAGAGGCAGCAGCACCAGCACCAGCAGCCGCCGACGATGGAGGAGTCTCTCG  
GGTCCCGCGGCTGAGCGCAGCGGCTCCAAAGCAGCAAGATCGGGGACGGCTGTTCTCGGCTCCCGCTCG  
ACCGCATTCGGCAGCAGAGCGCATGGGCTCGCGAAGCTGCCGAGCGACACCTGGCGGGTCTCTAA

>GAHD01000031 *Echiopsis curta* NGF-Ech-1 mRNA sequence  
ATGATGCATAGCGTAATGTCCATGCTGTGCTACACTCTGATTATTCATTTCTGATGGCATATCGGCAG  
CAACAAAATCTGAAGATAATGTCCCTCTCCGGCTCCCAACAGCTTTTGCTCAAATCATGAGGGTCT  
GAAAACACTCTCGAAATACAGATCAGCACCATCTGCTCTCTAAGAAGGCAAGGATCAAGAACTTGGATCA

GTAGCAAAACATCATTGTGGATCCCAAGCTTTTTTCAGAAGAGGCATTTCCAGTCACTTCGTGTTCTGTTCA  
GCACTCAGCCCCCACCATTGTCAAGAGATGAGCAAAAGTGTGGAGTTCTTGACAATGAAGATGCTCTTAA  
CAGGAATATCCGGACCAAACGTGAAAATCATCTGTGCATAACCTAGGGGAACATTCTGTGTGTGACAGT  
ATCAGTGTCTGGGTAGCAACAAAACCAACGCAACGGACATCAAAGGAAATATGGTGACTGTGATGGTAG  
ACATAAATCTTAATAATGAAGTCTACAAGCAGTACTTTTTTGAACCAAGTGCAGAAATCCAAATCCAGT  
ACCGAGTGGGTGCAGGGGCACTGATTCCAGGCATTGGAATTTCTATTGCACCACAACAGACATTTTGTG  
AGGGCATTAACCATGGAAGGCAATCGGGCATCTGGCGCTTCATTTCGATTGACACTGCCTGTGTGTGCG  
TAATCAGTAGAAAACTGTCAACTTCTGA

>GAHD01000032 Echiopsis curta SVM-P-Ech-32 mRNA sequence  
ATGATCCAAGCTCTCTTGGTAACTATATGCTTCACGGTTTTTCCATATCAAGGGAGCTCTATCATCTCTGG  
AATCCGGGAATGTTAATGATTATGAAGTAGTGTATCCACAAAAGTGCCTGCGTTGCCCAAAGGAGGAGT  
TCGAAATCCTCAGCCAGAGACCAAGTATGAAGATACAATGCAATATGAATTTCAAGTAAATGGAGAGCCA  
GTGGTCTCTCACTTAGAAAGAAATAAAGGACTTTTTTCAGAAGATTACACTGAAACTCATTATGCCCTG  
ATGGCAGAGAAATTACAACAAGCCCTCCGGTTCAGGATCACTGCTATTATCATGGCTACATTGAAATGA  
AGCTGATTCAAGTGCAGTCACTAGTGCATGCGACGGCTTGAAGGACATTTCAAGCATCGAGGGGAGACA  
TACTTTATTGAGCCCTTGAAGCTTTCGACAGTGAATCCCATGCAATCTACAAAGATGAAATGTAGAAA  
AAGAGGATGAGATCCCAAAATCTGTGGGTAAACCCATACTACTTCGGAGTCAGATGAGCCCATCGAAAA  
GATCTCTCAATTAACCTTATCTCTGAACAAAACAGGTACTTGCAGATCAAAAAATACATTGAGTTCTAT  
GTAGTTGTGGACAACAGATTGTACAAGAATTACAGCAGCAACAGAGATGCTATAAAAAACAGGAGTATATG  
AAATGGTCAACATTTTAAATGTGATGTACAGACCTTTGAATGTTCTATTGCATTGATGCGCTGGAAT  
TTGGACCAACCAAGATGAGATTAAGATTGAACCAGATGTGGAGGTCACTTTGGAATCATTGGAGAATGG  
AGAGAAACAGTTTACTGCTACGCAAAAGGAATGATAATGCTCAGTTACTTACGGGCATTGACTTCAACG  
GAGATACTGTAGGACTTGCTTACTTGGGCACCTCTGCAATCCGGAGGAATCTGTAGCAGTTATTCAGGA  
ACATAGCAGCAGAACCAAGCATAGTGGCATCTACAATGGCCCATGAGTTGGGTCAATCTGGGCATTAAAT  
CATGACAGCGCTTCTCTGTAAGTTGCAAGTGTGACCATGCAATATGCTGCGGCAATAAATGATGAACCTT  
TCTATGAGTTGAGCAATTGTAGTGTCCAGGAACATCAAATTTATCTTCTTAACCTTCAGACCACAATGCAT  
TCTCAACAAACCTTGTAGCACAGATATTGTTACACCTCCAGTTTGTGGAAATTACTTAGTGGAGGTGGGA  
AGCAATGTGACTGTGGCTTCTCTCAGGATTGTCAAGATGCTGCTGCAACGCTGCAACTTGTAAACTGC  
AACATGACTGTGACTCCGGAGAGTGTGTGAGCAATGCAAAATTAAGAAAGCAGGAGCAGAAATGCCGGGC  
AGCAAGGATGACTGTGACTTGCCTGAAAGCTGCACTGGCCAATCTGCTGAGTGTCCACGGACAGCTTC  
CAGGAAATGGACATCCATGCCAAACCAACAGGGTTACTGCTACAATGGGACATGCCCTCATGACAA  
ACCAGTGTATTGCTCTAATGGGGCCAGGTGTAAGTGTGCTCCAGATGAATGTTTACGTTGAAACAGAA  
TGACCCAAATTTGTGGCTTCTGCAAGATAGAAATGGTAGAAAGATTCCATGTGCAGAAAGGATAAAATG  
TGTGGCATGTTAGTATGCTGAGAAAGAGAAATCGAAATGCACTGCTTTACTACAACAGATGACCCAGATT  
ATGGAATGGTTGATCTCTGGAACAAAATGTGAAGATGGAAGGTGTGCATCAACAGGCAGTGTGTTGATGT  
GCAGACAGCCTACTGA

>GAHE00000000.1|GAHE01000000 TSA: *Furina ornata*, transcriptome shotgun assembly, transcriptome shotgun assembly

>GAHE01000001 *Furina ornata* 3FTx-Fur-10 mRNA sequence  
ATGAAACTCTGCTGCTGACCTTGGTGGTGGTGACAATCGTGTGCCTGGACTTGGGTGACAGCGTGATAT  
GCTACTTTGGTTATAATTACTTTCGGACTTGTCCAGATGGGCACCAATGCTTTACAAAGACTTGGTGTGA  
TGCTTGGTGTAGCGTCAGAGGACCACGGGTGCAAAATGGGATGTGAAGCTACTTGCCCTATAGTGAAGCCC  
GGTATAAGATGTTCTGTTGCTCAACAGACAAATGCAACCCATTTCCGAAATGGGAACGTCCTACACGAA  
GTCTCTGA

>GAHE01000002 *Furina ornata* 3FTx-Fur-11 mRNA sequence  
ATGAAACTCTGCTGCTGACCTTGGTGGTGGTGACAATCGTGTGCCTGGACTTGGGTGACAGCGTGATAT  
GCTACTTTGGTTATAATTACTCTCGGACTTGTCCAGATGGGCACCAATGCTTTACAAAGACTTGGTGTGA  
TGCTTGGTGTGCTGAGAGGACCGGAGTCGAAATGGGATGTGAAGCTACTTGCCCTACAGTGAAGCCC  
GGTGTAAAGATTTTCTGTTGCTCAACAGACAAATGCAACCCATTTCCGAAATGGGAACGTCCTACACGAA  
GTCTCTGA

>GAHE01000003 *Furina ornata* 3FTx-Fur-12 mRNA sequence  
ATGAAACTCTGCTGCTGACCTTGGTGGTGGTGACAATCGTGTGCCTGGACTTGGGTGACAGCGTGATAT  
GCTACTTTGGTGAAATTAATTACTCTCGGACTTGTCCAGATGGGCACCAATGCTTTACAAAGACTTGGTGTGA  
TCCTTGGTGTAGCGTCAGAGGACCACGGGTGCAAAATGGGATGTGAAGCTACTTGCCCTACAGTGAAGAAG  
GGTATAAGATATTCTGTTGCTCAACAGACAAATGCAACCCATTTCCGAAATGGGAACGTCCTACACGAA  
GTCTCTGA

>GAHE01000004 *Furina ornata* 3FTx-Fur-13 mRNA sequence  
ATGAAACTCTGCTGCTGACCTTGGTGGTGGTGACAATCGTGTGCCTGGACTTGGGTGACAGCGTGATAT  
GCTACTTTGGTGAAATTAATTACTCTCGGACTTGTCCAGATGGGCACCAATGCTTTACAAAGACTTGGTGTGA  
TCCTTGGTGTAGCGTCAGAGGACCACGGGTGCAAAATGGGATGTGAAGCTACTTGCCCTACAGTGAAGAAG  
GGTATAAGATATTCTGTTGCTCAACAGACAAATGCAACCCATTTCCGAAATGGGAACGTCCTACACGAA  
GTCTCTGA

>GAHE01000005 *Furina ornata* 3FTx-Fur-14 mRNA sequence  
ATGAAACTCTGCTGCTGACCTTGGTGGTGGTGACAATCGTGTGCCTGGACTTGGGTGACAGCGTGATAT  
GCTACTTTGGTGAAATTAATTACTCTCGGACTTGTCCAGATGGGCACCAATGCTTTACAAAGACTTGGTGTGA  
TCCTTGGTGTAGCGTCAGAGGACCACGGGTGCAAAATGGGATGTGAAGCTACTTGCCCTACAGTGAAGAAG  
GGTATAAGATATTCTGTTGCTCAACAGACAAATGCAACCCATTTCCGAAATGGGAACGTCCTACACGAA  
GTACTTGA

>GAHE01000006 *Furina ornata* 3FTx-Fur-16 mRNA sequence  
ATGAAACTCTGCTGCTGACCTTGGTGGTGGTGACAATCGTGTGCCTGGACTTGGGTGACAGCGTGATAT  
GCTACTTTGGTGAAATTAATTACTCTCGGACTTGTCCAGATGGGCACCAATGCTTTACAAAGACTTGGTGTGA  
TCCTTGGTGTAGCGTCAGAGGACCACGGGTGCAAAATGGGATGTGAAGCTACTTGCCCTACAGTGAAGAAG  
GGTATAAGATATTCTGTTGCTCAACAGACAAATGCAACCCATTTCCGAAATGGGAACGTCCTACACGAA  
GCCCTTGA

>GAHE01000007 *Furina ornata* 3FTx-Fur-17 mRNA sequence  
ATGAAACTCTGCTGCTGACCTTGGCGGTGGTGACAATCGTGTGCCTGGACTTGGGTGACAGCGTGATAT  
GCTACTTTGGTTATAATTACTCTCGGACTTGTCCAGATGGGCACCAATGCTTTACAAAGACTTGGTGTGA  
TGCTTGGTGTGCTGAAAGAGGACCGGAGTCGAAATGGGATGTGAAGCTACTTGCCCTACAGTGAAGCCC  
GGTGTAAAGATTTTCTGTTGCTCAACAGACAAATGCAACCCATTTCCGAAAGTTGAACGTCCTGGATGA

>GAHE01000008 *Furina ornata* 3FTx-Fur-23 mRNA sequence  
ATGAAACTCTGCTGCTGACCTTGGTGGTGGTGACAATCGTGTGCCTGGACTTGGGTGACAGCGTGATAT

GCTACTTTTGGTTATAATTACTTTTCGGACTTGTCCAGATGGGCACCAATGCTTTACAAAGACTTGGTGTGA  
TGCTTTGGTGTAGCGTCAGAGGACCACGGGTCGAAATGGGATGTGAAGCTACTTGCCTTATAGTGAAGCCT  
GGTATAAAGATGTTCTGTTGCTCAACAGACAAATGCAACCCATTTCCGAAATGGGAACGTCTTACACGAA  
GTCTTTGA

>GAHE01000009 Furina ornata 3FTx-Fur-24 mRNA sequence  
ATGAAAACTCTGCTGCTGACCTTGGTGGTGGTGACAATCGTGTGCCTGGACTTGGGTGACAGCGTGATAT  
GCTACTTTGGTTATAATTACTCTCGGACTTGTCCAGATGGGCACCAATGCTTTACAAAGACTTGGTGTGA  
TGCTTTGGTGTGCTGAAAGAGGACCGCGAGTGCAAATGGGATGTGAAGCTACTTGCCTTACAGTGAAGCCC  
GGTGTAAGATTTTCTGTTGCTCAACAGACAAAGTGAACCCATTTCCGAAATGGGAACGTCTTACACGAA

>GAHE01000010 Furina ornata 3FTx-Fur-26 mRNA sequence  
ATGAAAACTCTGCTGCTGACCTTGGTGGTGGTGACAATCGTGTGCCTGGACTTGGGTGACAGCTTGATAT  
GCTACTTTGGTTATAATTACTCTCGGACTTGTCCAGATGGGCACCAATGCTTTACAAAGACTTGGTGTGA  
TGCTTTGGTGTTCGTCAGAGGACCGCGGGTCGAAATGGGATGTGAAGCTACTTGCCTTATAGTGAAGCCC  
GGTATAAAGATATTCTGTTGCTCAACAGACAAATGCAACCCATTTCCGAAATGGGAACGTCTTACACGAC  
GTCCTTGA

>GAHE01000011 Furina ornata 3FTx-Fur-27 mRNA sequence  
ATGAAAACTCTGCTGCTGACCTTGGTGGTGGTGACAATCGTGTGCCTGGACTTGGGTGACAGCTTGATAT  
GCTACTTTGGTTATAATTACTCTCAGACTTGTCCAGATGGGCACCAATGCTTTACAAAGACTTGGTGTGA  
TGCTTTGGTGTTCATCAGAGGACCGCGGGTCGAAATGGGATGTGAAGCTACTTGCCTTATAGTGAAGCCC  
GGTATAAAGATGTTCTGTTGCTCAACAGACAAATGCAACCCATTTCCGAAATGGGAACGTCTTACACGAC  
GTCCTTGA

>GAHE01000012 Furina ornata 3FTx-Fur-28 mRNA sequence  
ATGAAAACTCTGCTGCTGACCTTGGTGGTGGTGACAATCGTGTGCCTGGACTTGGGTGACAGCGTGATAT  
GCTACTTTGGTGAAAATTATCTCAGACTTGTCCAGATGGGCACCAATGCTTTACAAGGACTTGGTGTGA  
TCCTTTGGTGTAGCGTCAGAGGACCACGGGTCGAAATGGGATGTGAAGCTACTTGCCTTACAGTGAAGAAG  
GGTATAAAGATATTCTGTTGCTCAACAGACAAATGCAACCCATTTCCGAAATGGGAACGTCTTACACGAC  
GTCCTTGA

>GAHE01000013 Furina ornata 3FTx-Fur-31 mRNA sequence  
ATGAAAACTCTGCTGCTGACCTTGGTGGTGGTGACAATCGTGTGCCTGGACTTGGGTGACAGCTTGATAT  
GCTACTTTGGTTATAATTACTCTCAGACTTGTCCAGATGGGCACCAATGCTTTACAAGGACTTGGTGTGA  
TCCTTTGGTGTAGCGTCAGAGGACCACGGGTCGAAATGGGATGTGAAGCTACTTGCCTTACAGTGAAGAAG  
GGTATAAAGATATTCTGTTGCTCAACAGACAAATGCAACCCATTTCCGAAATGGGAACGTCTTACACGAC  
ATCCTTGA

>GAHE01000014 Furina ornata 3FTx-Fur-33 mRNA sequence  
ATGAAAACTCTGCTGCTGACCTTGGTGGTGGTGACAATCGTGTGCCTGGACTTGGGTGACAGCGTGATAT  
GCTACTTTGGTTATAATTACTCTCGGACTTGTCCAGATGGGCACCAATGCTTTACAAAGACTTGGTGTGA  
TGCTTTGGTGTCTCTGAAAGAGGACCGCGAGTCGAAATGGGATGTGAAGCTACTTGCCTTACAGTGAAGCCC  
GGTGTAAGATTTTCTGTTGCTCAACAGACAAATGCAACCCATTTCCGAAATGGGAACGTCTTACAGTGA

>GAHE01000015 Furina ornata 3FTx-Fur-44 mRNA sequence  
ATGAAAACTCTGCTGCTGACCTTGGTGGTGGTGACAATCGTGTGCCTGGACTTGGGATACACCAGGACAT  
GCTGGTTAACACCTGAAGTTAAACCTCAGACTTGTCCACCTGGGCAGGACCAATGCTTTACAAAGACTTG  
GTGTGATGCTTTGGTGTCCCATCAGAGGAGAGCGAGTTGAATTGGGATGTGCTGCTACTTGCCTTACAGTG  
AAGCTTGGTGTAAAGATTGCTGTTGCTCAACAGACAAATGCAACCCATTTCCGACAAAACGTGCTTGA

>GAHE01000016 Furina ornata 3FTx-Fur-46 mRNA sequence  
ATGAAAACTCTGCTGCTGACCTTGGTGGTGGTGACAATCGTGTGCCTGGACTTGGGATACACCAGGACAT  
GCTGGTTAACACCTGAAGTTAAACCTCAGACTTGTCCACCTGGGCAGGACCAATGCTTTAAAAAGACTTG  
GTGTGATGCTTTGGTGTCCCATCAGAGGAGAGCGAGTCGAATTGGGATGTGCTGCTACTTGCCTTACAGTG  
AAGCTTGGTGTAAAGATTGCTGTTGCTCAACAGACAAATGCAACCCATTTCCGACAAAACGTGCTTGA

>GAHE01000017 Furina ornata 3FTx-Fur-55 mRNA sequence  
ATGAAAACTCTACTGCTGACCTTGGTAGTGGTGACAATCGTGTGCCTGGACTTGGGATACCCCTAGCAT  
GTCTCCACTCTCCGGTTCTCTAGTTATTCCGTTTGTCCAGGGTACATGACCATTGCTATCGATATGA  
TTTTTCACCAATTAAAGATAAAGTCGTAACCGTCAGGGGATGTAGTGCTTCTTGCCCTGGAGGAAGAAAT  
CATGTGTGTTGCAGTACAGACATGTGCAACCGGTAG

>GAHE01000018 Furina ornata 3FTx-Fur-57 mRNA sequence  
ATGAAAACTCTGCTGCTGACCTTGGTAGTGGTGACAATCGTGTGCCTGGACTTAGGATACCCCTAGTAT  
GTCTCCACTCTCCGGTTCTCTAGTTATTCCGTTTGTCCAGGGTACATGACCATTGCTATCGATATGA  
TTTTTCACCAATTAAAGATAAAGTCGTAACCGTTAGGGGATGTAGTGCTTCTTGCCCTGGAGGAAGAAAT  
CATGTGTGTTGCAGTACAGACATGTGCAACCGGTAG

>GAHE01000019 Furina ornata 3FTx-Fur-58 mRNA sequence  
ATGAAAACTCTGTTGCTGACCTTGGTAGTGGTGACAATCGTGTGCCTGGACTTAGGATACCCCTAGTAT  
GTCTCCACTCTCCGGTTCTCTAGTTATTCCGTTTGTCCAGGGTACATGACCATTGCTATCGATATGA  
TTTTTCACCAATTAAAGATAAAGTCGTAACCGTTAGGGGATGTAGTGCTTCTTGCCCTGGAGGAAGAAAT  
CATGTGTGTTGCAGTACAGACATGTGCAACGAGTAG

>GAHE01000020 Furina ornata 3FTx-Fur-61 mRNA sequence  
ATGAAAACTCTGCTGCTGACCTTGGTAGTGGTGACAATCGCATGCCTGGACTTAGGATACCCCTAGTAT  
GTCTCCACTCTCCGGTTCTCTAGTTATTCCGTTTGTCCAGGGTACATGACCATTGCTATCGATATGA  
TTTTTCACCAATTAAAGATAAAGTCGTAACCGTCAGGGGATGTAGTGCTTCTTGCCCTGGAGGAAGAAAT  
CATGTGTGTTGCAGTACAGACATGTGCAACGAGTAG

>GAHE01000021 Furina ornata 3FTx-Fur-62 mRNA sequence  
ATGAAAACTCTGCTGCTGACCTTGGTAGTGGTGACAATCGCATGCCTGGACTTAGGATACCCCTAGTAT  
GTCTCCACTCTCCGGTTCTCTAGTTATTCCGTTTGTCCAGGGTACATGACCATTGCTATCGATATGA  
TTTTTCACCAATTAAAGATAAAGTCGTAACCGTTAGGGGATGTAGTGCTTCTTGCCCTGGAGGAAGAAAT  
CATGTGTGTTGCAGTACAGACATGTGCAACGAGTAG

>GAHE01000022 Furina ornata 3FTx-Fur-63 mRNA sequence  
ATGAAAACTCTACTGCTGACCTTGGTAGTGGTGACAATCATGTGCCTGGACTTAGGATACCCCTGAGAT  
GTCACAACTTGGAAATTATGGTTATATAAGTTGTGAAGCACACGCGCCCTTTGCTATAAATCTCGTCA  
TTATGGACGTACAGAGAACTACAATCGCCAGGGTTGACTGCTAAATGCTCTGAAAAAGTGAAGTG

TGTTGCAGTACAGACATGTGCAACAAGTAG

>GAHE01000023 Furina ornata 3FTx-Fur-64 mRNA sequence  
ATGAAAACTCTGCTGCTGACCTTGGTAGTGGTGACAATCGTGTGCCTGGACTTGGGATACACCCTAATAT  
GTCACAACTTGGAAATTATGGTTATATAAGTTGTGAAGCACACGAGACCTTTTGCTATAAAAGCTTTT  
TAATGGACGTACAGAGCGTCTCTCATCGCCCGGGTGTATTGCTACCTGCCCTGAAAAATATGAAGCG  
TGTTGCAGTACAGACATGTGCAACGAGTAG

>GAHE01000024 Furina ornata 3FTx-Fur-67 mRNA sequence  
ATGAAAACTCTGCTGCTGACCTTGGTAGTGGTGACAATCGTGTGCCTGGACTTGGGATACACCCTGAAAT  
GTCACAACTTGGAAATTATGGTTATATAAGTTGTGAAGCACACGAGACCTTTTGCTATAAACTCTCTTCA  
TTATGGACGTACAGAGAACTACGATCGCCCGGGTGTACTGCTAAATGCTCTGAAAAAGTTTAGTG  
TGTTGCAGTACAGACATGTGCAACGAGTAG

>GAHE01000025 Furina ornata 3FTx-Fur-74 mRNA sequence  
ATGAAAACTCTGCTGCTGACCTTGGTAGTGGTGACAATCGTGTGCCTGGACTTAGGATACACCCTGAAAT  
GTCACAACTTGGAAATTATGGTTATATAAGTTGTGAAGCACACGAGACCTTTTGCTATAAACTCTCTTCA  
TTATGGACGTACAGAGAACTACGATCGCCCGGGTGTACTGCTAAATGCTCTGAAAAAGTTTAGTG  
TGTTGCAGTACAGACATGTGCAACGAGTAG

>GAHE01000026 Furina ornata KP-Fur-10 mRNA sequence  
ATGCGACCCCGAGCGAGTTTCATCATGTCTTCTGGAGGTCTTCTTCTCCTGCTAGGACTCCTCACCCCTC  
TGGGCGGAGCTGACCCCGGTCTCCAGCAAGGCGCGGTCCAAAGTTAYTGTGAAGTGCCTGCTGACCGCGG  
ACCATGTAAAAGTTACTCTGAAGCCTTCTACTACAGCCAGTTTATCATAAATGCCTAAGGTTTATGTAT  
GGTGGATGCCCAGGGAATGCTAACAAATTTAAGACCATAGATGAATGCCAACGCACCTGTGCTGCATGA

>GAHE01000027 Furina ornata KP-Fur-17 mRNA sequence  
ATGCTTCTTGGAGGTCTTCTTCTCCTGCTAGGACTCCTCACCTCTGGGCGGAGCTGACCCCGTCTCCA  
CAAGGACCGTCCAAAGTTCTGTGAACCTGCTGACCTGACCTATGTAAACAAAACATCAAAGCCTT  
CTACTACAGTCATCATGCATGCCTACCGTTTATTTATGGTGGATGCCAAGGGAATGCTAACAAATTTAAG  
ACCATAGATGAATGCCAACGCACCTGTGCTGCATGA

>GAHE01000028 Furina ornata KP-Fur-8 mRNA sequence  
ATGTYTCTTGGAGGTCTTCTTCTCCTGCTAGGACTCCTCACCTCTGGGCGGAGCTGACCCCGTCTCCA  
CAAGGACCGTCCAAAGTTCTGTGAACCTGCTGACCTGACACCGGATGTAAAGATACATCAAAGCCTT  
CTACTACAGCCAGGTATCATGCATGCCTACCATTTGTTTTATGGTGGCTGCCAGGGAATGCTAACCAAT  
TTTAAGACCATAGATGAATGCAAACGCACCTGTGCTGCATGA

>GAHE01000029 Furina ornata KP-Fur-18 mRNA sequence  
ATGCCAGCCATACAGGAGACTTCATCATGTCTTCTGGAGGTCTTCTTCTCTACTGGGACTCCTCACCC  
TCTGGCAGAGCTGACCCCGTCTTCAAGAACGACCGTCCAAAGATCTGTGAAGTGCCTGCTGACCGCGG  
ACTATGTAAAAGATACATCAAAGCCTTCTACTACAGCCAGGTATCATGCATGCCTACCATTTATTTAT  
GGTGGATGCCCAGGGAATGCTAACAAATTTAAGACCATAGATGAATGCAAACGCACCTGTGCTGCATGA

>GAHE01000030 Furina ornata LP-Fur-1 mRNA sequence  
ATGGGGCGATTCTTCTTGGTGAGCCTCAGCTTGCTGGTGGTCTTCTCCCTAAGTGAATCGAAGCCA  
ATCGCTATTGTGCTTGGATTGGCTCTCCTACAATGTGTCTTGTCTACAAGTTCTTCTTCCAAAGGATGAC  
CTGGGACGAAGCACAGAGGTTCTGTGTGAACAGCAGGAAAACTCCCAACTCGCTCCATCCATGACATG  
GGAGAGTCAGTCAAGTTGTCCAACCTACATGTCCAAAGATGGAATTTCTTTGATGTTTGGATGGGACTGA  
GGCTTTCAAAGAGAAAAAGGCATCTGGGAGTGGAGTGACGGCTCCAATCTCACTTACACATCCTGGGAAGA  
TGGTGAAACCAACAATTTTTCAACAGGGAATTTCTGTGCTGTGCTATCAATCGGATCACGGTATCTCCAA  
TGGAACGATAAGAAGTGCATGCACAAGCATCCATTTGTCTGCAAGTTCCAGCCCGGAGTGAGGCAGGCG  
CGTTGGAGAACGATGA

>GAHE01000031 Furina ornata LP-Fur-2 mRNA sequence  
ATGGGGCGATTGCTCTTGGTGAGCCTGAGCTTGCTGCTTGTGACTTTATCCCTAAATGGAATGGAGCTG  
ATCATCACTGCCCCTCGGACTGGTACTCCTATGAGGCGTTTTGCTACAAGGTCGTCAAAGAATGGAAGAC  
CTGAAAAGATGCCAGGCATCCTGTGAACAACCTCAGGACAAAAGCCACCTGGCCTCCGTCCACAGCCTG  
GCAGAGACCATTAACATCCGAAAGGCCATCTTCGGCAGTTTCGATCCGCATCAGTGATATCTGGCTTGGAC  
TGAGTAACTCAGAGGGAAATCGCAACTGGGAGTGGAGTGATGGCTCCAATTTAATTATACAGCCTGGGA  
ACTATTTGAACCCGATGATGATGAGGATGAAAACCTGCGTTAAGTTGACCAGTATGTCAAGGTATTCTAAA  
TGGAAAATTTCCAAGTGTGAATCCAAGAATTTTTCATCTGCAAGATGTAG

>GAHE01000032 Furina ornata LP-Fur-3 mRNA sequence  
ATGGGGCGATTGCTCTTGGTGAGCCTGAGCTTGCTGCTTGTGACTTTATCCCTAAATGGAATGGAGCTG  
ATCATCACTGCCCCTCGGATTGGTACTCCTATGAGGCGTTTTGCTACAAGGTCGTCAAAGAATGGAAGAC  
CTGAAAAGATGCCAGGCATCCTGTGAACAACCTCAGGACAAAAGCCACCTGGCCTCCGTCCACAGCCTG  
GCAGAGACCATTAACATCCGAAAGGCCATCTTCGGCAGTTTCGATCCGCATCAGTGATATCTGGCTTGGAC  
TGAGTAACTCAGAGGGAAATCGCAACTGGGAGTGGAGTGATGGCTCCAATTTAATTATACAGCCTGGGA  
ACCATTTGAACCCGATGATGATGAGGATGAAAACCTGCGTTAAGTTGACCAGTATGTCAAGGTATTCTAAT  
TGGAAAATTTCCAAGTGTGAATCCAAGAATTTTTCATCTGCAAGATGTAG

>GAHE01000033 Furina ornata LP-Fur-5 mRNA sequence  
ATGGCACGATTCAATTTCTCTAAGTCTTGGCTTGCTGGTTGTGGCCCTCTCCTTAAGGGGAAGTGGAGCCA  
ATCCCCAATGTCCCAACGAGTGGTCTTCTTTAATGGATATTGCTACAAGGTCCTCAAACATCTCAAGAG  
CTGGCGTGATGCAGAGATGTCTCTCAGGCGTCAGGAGGAAGGCAGCCACCTCGCCTCCATCCAAAGCTCG  
GCAGAGTCATCTTACGTGGCCAGGTTGATCTCCCGCAATGTCTTCTTCAACGTCCTGGATCGGACTGA  
GTGATCCAGAGAGACGAGGCATCTGGAAGTGGAGCGATGGCTCCAGGTTCTCTACAATCCTGGAAAAG  
AGGAGAACCAACAACATTTTTCGGGAACGAGTACTGCGTCGAAGTGTGGAGATTGTCAAGGTATCTCTCA  
TGGAACGATAAGAATTGCTGGTCCAAGCTTTATTTTCATCTGCAAGTTCCAGCCACAGGACGAGGGAAGCA  
CCTGGTGA

>GAHE01000034 Furina ornata LP-Fur-6 mRNA sequence  
ATGGCACGATTCAATTTCTCTAAGTCTTGGCTTGCTGGTTGTGGCCCTCTCCTTAAGGGGAAGTGTAGCCA  
ATCCCCAATGTCCCTACGATGGTCTTCTTTAATGGATATTGCTACAAGGTCCTCAAACAACCTCAAGAG  
CTGGCGTGATGCAGAGATGTCTCTCAGGCGTCAGGAGGAAGGCAGCCACCTCGCCTCCATCCAAAGCTCG  
GCAGAGTCATCTTACGTGGCCAGGTTGATCTCCCGCAATGTCTTCTTCAACGTCCTGGATCGGACTGA  
GTGATCCAGAGAGACGAGGCATCTGGAAGTGGAGCGATGGCTCCAGGTTCTCTACAATCCTGGAAAAG  
AGGAGAACCAACAACATTTTTAGGGAACGAGTACTGCGTCGAAGTGTGGAGCTTCTTCAAAATCCTGGAAA  
AGGAGAACCAACAACATTTTTAGGGAACGAGTACTGCGTCGAAGTGTGGAGCTTGTCAAGGTATCTCTCA  
TGGAACGATAAGAATTGCTGGTCCAAGCTTTATTTTCATCTGCAAGTTCCAGCCACAGGATGAGGGAAGCA  
CCTGGTGA

>GAHE01000035 *Furina ornata* LP-Fur-7 mRNA sequence  
ATGGCACGATTCAATTTCTCTAAGTCTTGGCTTGCTGGTTGTGGCCCTCTCCTTAAGGGGCACTGGAGCCA  
ATCCCCAATGTCCCCAAGAGTGGTCCCTTCTTAAATGGATATTGCTACAAGGTCTTCAAACATCTCAAGAG  
CTGGCGGTGATGCAGAGATGTCTCTGCAGGCGTCAGGAGGAAGGCAGCCACCTCGCCTCCATCCAAAGCTCG  
GCAGAGTCATCTTACGTGGCCAAAGCTGATCTCCGCGATGTCTTCTCATCAACGTCTGGATCGGACTGA  
GTGATCCAGAGAAACGAGGCATCTGGAAGTGGAGCGATGGCTCCAGGTTCTCTACAAATCCTGGAAG  
AGGAGAACCCCAACAACCTTTTAKGGAACGAGTACTGCGTCGAACCTGTGGAGCTTGTCAAGGTATCTCTCA  
TGGAACGATAAGAATTGCTGGTCCAAGCTTTATTTTCATCTGCAAGTTCAGGCCACAGGATGAGGGAAGCA  
CCTGGTGA

>GAHE01000036 *Furina ornata* NGF-Fur-1 mRNA sequence  
ATGTCCATGTGTGTCTACACTCTGATTATAGCATTTCTGATTGGCACATGGGCAGCACCAAAATCTGAAG  
ATAATGTCCCCTCTGGGCTCCCCTGCAACATCTGACCTTTCTGACACCGGCTGTGCTAAAACATGAGGG  
TCTGAAAACATCTCGAAATACAGATCAGCGCCATCTGCTCCTAAGAGGCAGAAGATCAAGAACTTGGA  
TCAGCAGCCAAACATCATTGTGGATCCCAAGCTTTTTTCAAGAGTGGCGTTTCCAGTCACCTCGTGTCTGT  
TCAGCACTCAGCCCCCACCATTGTCAAGAGATGAGCAAAAGTGTGGAGTTTCTGGACAATGAAGACACTCT  
TAACAGGAATATCCGACCAACAGTGAACATCATCTGTGCATGACCAAGGAGAACATCTGTGTGTGAC  
AGTATCAGTGTCTGGGTGGCCAAACAACTATAGCAACAGACATCAAAGGCAATGTGGTGAATGTGATAG  
TGGACATAAAATTTAATAATGAAGTCTACAAGCAGTACTTTTTTGAACCAAGTGCAGAAATCCAAATCC  
AGTATCGAGTGGGTGCAGGGGCATTGATTCCAGGCATTGGAATTTCTATTGCACCACAAAACAAACATTT  
GTCAAGGCATTAACCATGGAAGACAATCTGCATTTCTGGCGCTTATTTCGATTGACACTGCCTGTGTGT  
GCGTAATCAGTAGAAAAGCTGACAACTTCTGA

>GAHE01000037 *Furina ornata* SVMP-Fur-1 mRNA sequence  
ATGCAGCCAGAGGGCGAAGTAACTTTTGAATCATTGGAGAATGGAGAGAGAAAAATTGCTGCCACGCA  
AAAGGAATGATAATGTCTCAGTTACTCAGCGCATTTGACTTCAGCGAAAATGTTGTAGGACTTGGTTATGT  
GGGCACCTCTGCAGTCCGAAGTCATCTGTAGCAGTTATTTCAGGATTATAGCAGAAGAGCAAGTGTCTATG  
GCATCTGTAAATGGCCCATGAGTTGGGTCATAATCTGGGCATTAATCATGACAGCGCTTCTGTAAATTTGA  
ATGCTGGACGATGCATTATGTCTGCGATAATAAGTGATGAACCTCTCTATGAGTTCAGCTCTTGTAGTGT  
CCAGGAACATCAGAGGTATCTTCTTAGACACAGACCACAATGCATTTCTCAACAAACCTTGAGCACAGAT  
ATTGTTACCTGCACTTGTGGAAATTTACTTTGTGGAGTGGGAGAAGAATGTGATGTGGTTCTCTCTCAG  
GATTGTCAAAGTGCTGCTGCAATGCTGCAAACTTGTA

>GAHE01000038 *Furina ornata* VEGF-Fur-1 mRNA sequence  
ATGAACCTTTCTGCTCACTTGGATCCACTGCGGATTGGCGGCGCTGCTTTATTTCACAAACGCCAAGGTGT  
TGCAGGCTGCTCCTGCCCAAGAGGATGGAGAGAAGCAACCAGAAGAAGTTATCCCATTTATGACGGTCTT  
TGAGCCGAGTGCTGAGRCCCATTGAGACCATGGTAGATATTTACCAGGAGTATCCTGATGAGGTGGAA  
TACATGTTCAAACCATCTGTGTGCTCCTGATGAAATGTGGAGGATTCTGTAATGACGAAGCGCTAGAAT  
GTGTGCCCACAGAGGTGTACAATGTGAGCATGGAGATCATGAACTCAGACACTTTTCAGAGCCAGCATAT  
ACAACGTGATGAGCTTCCAGCAGCACAGTAAATGTCAATGTCAGACAAAAGAAACCACTGATAATTAAACAA  
GAAAAATGTGACAAACCAAGCGGTGA

>GAHF00000000.1|GAHF01000000 TSA: *Hemiaspis signata*, transcriptome shotgun assembly, transcriptome  
shotgun assembly

>GAHF01000001 *Hemiaspis signata* 3FTx-Hem-2 mRNA sequence  
ATGAAAACCTCTGCTGCTGACCTTGGTGGTGGTGACAATCGTGTGCCTGGACTTAGGTAACAGCTTCTCAT  
GCTACAAAACACCTGATGTTAAATCTGAGGCTTGTGCAGCTGGGGAGAACCCTATGCTATACAAAGACTTG  
GTGTGTTCTATGTGTTCCATCAGAGGAAGTTTAATCGAACTGGGATGTGCTGCTACTTGCCCTAAAGCG  
AAGCCCGGTGTGGATATTACCTGTTGCTCAACAGACAATTGCAACCCACATCCGGCACACAACCTCTCGTT  
GA

>GAHF01000002 *Hemiaspis signata* 3FTx-Hem-5 mRNA sequence  
ATGAAAACCTCTGCTGCTGACCTTGGTGGTGGTGACAATCGTGTGCCTGGACTTAGGTAACAGCTTCTCAT  
GCTACAAAACACCTGATGTTAAATCTGAGCCTTGTGCAGCTGGGGAGAACCCTATGCTATACAAAGACTTG  
GTGTGTTCTATGTGTTCCATCAGAGGAAGTTTAATCGAACTGGGATGTGCTGCTACTTGCCCTAAAGCG  
AAGCCCGGTGTGGATATTACCTGTTGCTCAACAGACAATTGCAACCCACATCCGGCACACAACCTCTCGTT  
GA

>GAHF01000003 *Hemiaspis signata* 3FTx-Hem-6 mRNA sequence  
ATGAAAACCTCTGCTGCTGACCTTAGTGGTGGTGACAATCGTGTGCCTGGACTTAGGTAACAGCTTCTCAT  
GCTACAAAACACCTGATGTTAAATCTGAGGCTTGTGCAGCTGGGGAGAACCCTATGCTATACAAAGACTTG  
GTGTGTTCTATGTGTTCCATCAGAGGAAGTTTAATCGAACTGGGATGTGCTGCTACTTGCCCTAAAGCG  
AAGCCCGGTGTGGATATTACCTGTTGCTCAACAGACAATTGCAACCCACATCCGGCACACAACCTCTCGTT  
GA

>GAHF01000004 *Hemiaspis signata* 3FTx-Hem-7 mRNA sequence  
ATGAAAACCTCTGCTGCTGACCTTGGTGGTGGTGACAATCGTGTGCCTGGACTTAGGTAACAGCTTCTCAT  
GCTACAAAACACCTGATGTTAAATCTGAGGCTTGTGCAGCTGGGGAGAACCCTATGCTATACAAAGACTTG  
GTGTGTTCTATGTGTTCCATCAGAGGAAGTTTAATCGAACTGGGATGTGCTGCTACTTGCCCTAAAGCG  
AAGCCCGGTGTGGATATTACCTGTTGCTCAACAGACAATTGCAACCCACATCCGGCACACAACCTCTCGTT  
GA

>GAHF01000005 *Hemiaspis signata* 3FTx-Hem-9 mRNA sequence  
ATGAAAACCTCTGCTGCTGACCTTGGTGGTGGTGACAATCGTGTGCCTGGACTTAGGTAACAGCTTGA  
GCTACCTGAGCTCTACTCACTTAAGGATTGTGCAGCTGGGGAGGACCTATGTTATACAAAGACTTGGTG  
TGATGGCTTGGTGTAGCCAGAGAGGACGAGTCAATGGGATGTGCTGCTACTTGCCCTACAGCGAAG  
CCCAGGTTGACTGTTAAGTGTGCTCAACAGACAATTGCAACACATTTCCAGTACAACCTAAACCAAATC  
CTCAGGGTGTCTCTCATCCATCATGGACCATCCTTGA

>GAHF01000006 *Hemiaspis signata* 3FTx-Hem-11 mRNA sequence  
ATGAAAACCTCTGCTGCTGACCTTGGTGGTGGTGACAATCGTGTGCCTGGACTTAGGTAACAGCTTGT  
GCTACAAAACACCTGATGTTAAATCTGAGGCTTGTGCAGTTGGGGAGAACCCTATGCTATACAAAGACTTG  
GTGTGATACTTTTGTAGCAGCAGAGGAAAGGTAGTCAACTGGGATGTGCTGCTACTTGCCCTGTACCG  
GAGTCTACGAGGAAGTTACCTGTTGCTCAACAGACATTTGCAACAAATTTCCAGTACAATCTAAACCAT  
ATCCTAGACAGGGTGTCTCTCATCCATCATGGACCATCCTTGA

>GAHF01000007 *Hemiaspis signata* 3FTx-Hem-12 mRNA sequence  
ATGAAAACCTCTGCTGCTGACCTTGGTGGTGGTGACAATCGTGTGCCTGGACTTAGGTAACAGCTTGA

GCTACCTGAGCTCTACTCACTCTAAGGATTGTGCAGTTGGGGAGGACCTATGCTATACAGAGACTTGGTG  
TGATGCTTGGTGTGGCGTGAGAGGACAGCGAGTCAATTTGGGATGTGCTGCTACTTGCCCTACAGCGAAG  
CCCAGGGTGACTGTTAAGTGTGTGCTCAACAGACAATTGCAACACATTTCCAGTACAACCTAAACCAATC  
CTCGAGGGTTGCTCTCATCCATCATGGACCATCCTTGA

>GAHF01000008 *Hemiaspis signata* 3FTx-Hem-14 mRNA sequence  
ATGAAAACCTCTGCTGCTGACCTTGGTGGTGGTGACAATCGTGTGCCTGGACTTAGGTGACAGCTTGAAAT  
GCTACTGAGCTCTACTCACTCTAAGGATTGTGCAGTTGGGGAGGACCTATGCTATACAGAGACTTGGTG  
TGATGCTTGGTGTGGCGTGAGAGGACAGCGAGTCAATTTGGGATGTGCTGCTACTTGCCCTACAGCGAAG  
CCCAGGGTGACTGTTAAGTGTGTGCTCAACAGACAATTGCAACACATTTCCAGTACAATCTAAACCAATC  
CTCGAGGGTTGCTCTCATCCATCATGGACCATCCTTGA

>GAHF01000009 *Hemiaspis signata* 3FTx-Hem-16 mRNA sequence  
ATGAAAACCTCTGCTGCTGACCTGGTGGTGGTGACAATCGTGTGCCTGGACTTAGGATACACCATGACAT  
GTTGCAACCAACAGTCATCGCAACCTAAAACCACTAAAACCTTGTGAAGAGAGCACTTGCTATAAAAAGAC  
TTGGAGAGATCACCGTGGAACTATCATTGAAAGGGGATGTGGTTGCCTAAGGTGAAGCCCGGTATTCAA  
CTTGAATGTTGCGAAGACAGCAATGCAACCAATTAG

>GAHF01000010 *Hemiaspis signata* 3FTx-Hem-18 mRNA sequence  
ATGAAAACCTCTGCTGCTGACCTGGTGGTGGTGACAATCGTGTGCCTGGACTTAGGATACGCCATAACAT  
GTTGCGAACCAACAGTCATCGCAACCTAAAACCACTAAAACCTTGTGAAGAGAGCACTTGCTATAAAAAGAC  
TTGGAGAGATCACCGTGGAACTATAATTGAAAGGGGATGTGGTTGCCTAAGGTGAAGCCCGGTATTCAA  
CTTGAATGTTGCGGAAAAGACGAATGCAACCAATTAG

>GAHF01000011 *Hemiaspis signata* 3FTx-Hem-19 mRNA sequence  
ATGAAAACCTCTGCTGCTGACCTGGTGGTGGTGACAATCGTGTGCCTGGACTTAGGATACACCATGACAT  
GTTGCAACCAACAGTCATCGCAACCTAAAACCACTAAAACCTTGTGAAGAGAGCACTTGCTATAAAAAGAC  
TTGGAGAGATCACCGTGGAACTATCATTGAAAGGGGATGTGGTTGCCTAAGGTGAAGCCCGGTATTCAA  
CTTGAATGTTGCGAAGACAGATGAATGCAACCAATTAG

>GAHF01000012 *Hemiaspis signata* 3FTx-Hem-21 mRNA sequence  
ATGAAAACCTCTGCTGCTGACCTGGTGGTGGTGACAATCGTGTGCCTGGACTTAGGATACACCATGACAT  
GTTGCAACCAACAGTCATCGCAACCTAAAACCACTAAAACCTTGTGAAGAGAGCACTTGCTATAAAAAGAC  
TTGGAGAGATCACCGTGGAACTATAATTGAAAGGGGATGTGGTTGCCTAAGGTGAAGCCCGGTATTCAA  
CTTGAATGTTGCGAAGACAGCAATGCAATAATTAG

>GAHF01000013 *Hemiaspis signata* 3FTx-Hem-24 mRNA sequence  
ATGAAAACCTCTGCTGCTGACCTGGTGGTGGTGACAATCGTGTGCCTGGACTTAGGATACACCATGACAT  
GTTGCAACCAACAGTCATCGCAACCTAAAACCACTAAAACCTTGTGAAGAGAGCACTTGCTATAAAAAGAC  
TTGGAGAGATCACCGTGGAACTATCATTGAAAGGGGATGTGGTTGCCTAAGGTGAAGCCCGGTATTCAA  
CTTGAATGTTGCGAAGACAGCAATGCAACCAATTAG

>GAHF01000014 *Hemiaspis signata* 3FTx-Hem-29 mRNA sequence  
ATGAAAACCTCTGCTGCTGACCTTGGTGGTGGTGACAATCGTGTGCCTGGACTTAGGATACGCCATAACAT  
GTTGCAACCAACAGTCATCGCAACCTAAAACCACTCAAACTTGTACAGAGAGCTCTTGCTATAAAAAGAC  
TTGGAGAGATCACCGTGGAACTATAACTGAAAGGGGATGTGGTTGCCTGAGGTAAAGACCGGTGTTGGA  
ATTAATGTTGTGAAACAGATGAATGCAACCAATTAG

>GAHF01000015 *Hemiaspis signata* CRiSP-Hem-1 mRNA sequence  
ATGTTACAAATGGAATGGAATTCTCGTGCTGCTCAGAAATGCAAAACGTTGGGCAGATAAATGTACTTTTG  
CTCACAGTCCACGACATACAAGAACTGTGGGAAAACCTCAGTTGTGGTGAAAATATATTCATGTCAAGTCA  
ACCTTTTGCATGGAGTGGAGTAGTTCAAGCTTGGTATGATGAAGTTAAAAAATTCGTCTATGGCATTGGA  
GCAAAAGCCACAGGTTCTGTTATTGGCCATTATACCCAGGTAGTTTGGTACAAAAGTCACCTTCTGGTT  
GTGCTTCTGCCAAATGTCTTCAACCAAAATACCTCTACGTTTGTCAATACTGCCAGCAGGGAACATCAT  
AGGTTCAATTGCTACTCCATATAAATCAGGGCCACCTTGTGGGGACTGTCTTCCGCTTGTGTTAACGGA  
CTATGCAAAATCCTTGCAAAATATAATGATGACTTCTCGAACTGCAAAAGCTTAGCGAAAAAACTAAAT  
GCAAGACTGAATGGATCAAGTCAAAATGCCCTGCTGCTTGCTCCTGCCACAATAAAATAATATAG

>GAHF01000016 *Hemiaspis signata* KP-Hem-5 mRNA sequence  
ATGTGCCAGGAATTCATTTTTGGAGGTTGCAAAGGCAATGCCAACAACTTCGTCTCCAAACAGGACTGCT  
TCCAGGCGTGATCAGAGGAGGGCTGCAGAGGCAACAGTGGTACCCAGCGGGCCAGCCACTGAAGTGGC  
TACCAAGAGCTGGACATCTCCAGAGGCCCTACGAAAGCAGGCGCTGGCTTCAGAGAATTCTGTGCTGCG  
CCCCGGGTGGTAGGTCCCTGCCGGGCTCCTTCCCTCCGTTGGTACTTTGACCTAGAGAGCCGGATGTGCA  
AGATGTTTCATCTATGGGGCTGTCTGTGGCAACAAGAACAACTATCTCTTCAAGAGCACTGCTGGAGCCA  
GTGCAACAGGTGATGGAGAGATAAATGAAGAGCCAGGAGATGCAGGCGCCCAACCTCCCTCCCTCCAAA  
CCCTTCAGGTTCTCCACCAGAGCTGTGGTCCCTTGCCGCTCCTTCTGGCCATCCTGGTGACTATCCTGCTGG  
CCTCGATGGGGGTTTTCTTTAGATGTGCGCGAAGAACCGGAGTTGTCAAGTGGGAACAGTGTGGAG  
CAGCTGGATGACAAGAGTACCTGATGAGCAATGCCCTACACCCCTCTGA

>GAHF01000017 *Hemiaspis signata* KP-Hem-8 mRNA sequence  
ATGTCTTCTGGAGGTCTTCTTCTCCTGCTGGGACTCCTCACGCTCTGGGCGGAGCTGACCCCCGTCTCTG  
GCCAGGACCGTCCAAAGTTCTGTGAACCTGCCTGCTGACTCCGGATCATGTAAGGTTGACTTCCCTAGCCTT  
CTACTACAACCCAGATAAACATCAATGCCTAGAGTTTAGTTATGGTGGATGCGACGGGAATGATAACAAT  
TTTAAGACCATAGAGGAATGCAACCGCACCTGTGCTGCATGA

>GAHF01000018 *Hemiaspis signata* KP-Hem-9 mRNA sequence  
ATGTCTTCTGGAGGTCTTCTTCTCCTGCTGGGACTCCTCACGCTCTGGGCGGAGCTGACCCCCGTCTCTG  
GCCAGGACCGTCCAAAGTTCTGTGAACCTGCCTGCTGACTCCGGATCATGTAAGGTTGACTTCCCTAGCCTT  
CTACTACAACCCAAATCAACATCAATGCCTAGAGTTTAGTTATGGTGGATGCGACGGGAATGATAACAAT  
TTTAAGACCATAGAGGAATGCAACCGCACCTGTGCTGCATGA

>GAHF01000019 *Hemiaspis signata* KP-Hem-12 mRNA sequence  
ATGTCTTCTGGAGGTCTTCTTCTCCTGCTGGGACTCCTCACCTCTGGGAGGTGCTGACCCCCGTCTCCA  
GCAGGACCGTCCACATTTCTGTCTGCTGCCTCATGAAACCGGACTATGTAACGCAATATCCAAGCCTT  
CTACTACGACCCAGTTTATCATATCATGCCTAAAGTTTATTTATGGTGGATGCGAAGGAATGCTAACAAAT  
TTTAAGACCATAGATGAATGCAACCGCACCTGTGCTGCATGA

>GAHF01000020 *Hemiaspis signata* LAO-Hem-2 mRNA sequence  
ATGGCTGGGCTTAGTGCAGCTACGTTCTTGCAGGAGCTGGACATAAGGTGACGCTTCTTGAAGCTAGTG  
AACGTGTGGGAGGGCGAGTGAACTTATCGAAATGAAACGGAAGGCTGGTATGTCAATCTGGGACCCAT  
GCGTCTCCCTGAGAGACACAGGATTATCCGGGAATATATCAGAAAATTGGTCTCAAGTTGAACGAATTT

CTTCAGGAAAATGAGAATGCCTGGTATTTTATTAAAAACATCAGGAAGAGATATGGGAAGTCAAGAAAG  
ACCCCGGYGTCTTCAATATCCTTTGGAGCCCTCAGAAGAAGGCAAATCTGCTTCMCAGCTATATCGAGA  
ATCCCTCGAAAAGGTTATAGAAGAATTGAATACA

>GAHF01000021 *Hemiaspis signata* NP-Hem-1 mRNA sequence  
ATGGTCGGCCTCTCACGTCTGGCGGGCGGCGGGCTGCTGCTGCTGGTGTGGCCCTGCTGCCTCTCGCCC  
TCGACGGGAAGCCGGCGCCGCTGCCTCAGGCGCTGCTCAAGGCTCTGGCGGGCGGCATGATGGCGTCGGA  
GCGGGAGCTGACGGAGAGGCAGAAGCTGCAACAGGAGCACCAAGCCATCGCAGACGGAGGAGTCTTGGGT  
CCCGCGGCTGAGCGCAGCGGCTCCGAGACGGCCAAGCTAGGGGACGGCTGCTTCGGTGTCCCGATTGACC  
ACATCGGCAGCTCAAGCGGCATGGGCTGCGGAGGCGTCCCGAAGCCGACACCTGGCGGATCCTAA

>GAHF01000022 *Hemiaspis signata* NP-Hem-2 mRNA sequence  
ATGCTCTCACGTCTGGCGGGCGGCGGGCTGCTGCTGCTGGCCCTGCTGCCTCTCGCCCTCGACGGGAAGC  
CGGCGCGCTGCCTCAGGCGCTGCTCAAGGCTCCGGCGGGCGGCATGATGGCGTCGGGGCGGGAGCTGAC  
GGAGCGGCAGAAGCTGCAACAGGAGCACAGCCGCCGAGACGGAGGAGTCTTCGGGTCCCGCGGCTGAG  
CGCAGCGGCTCCGAGACGGCCAAGCTCGGGGACGGCTGCTTCGGCTCCCGATCGACCGCATCGGCAGCA  
CGAGCGGCTAGGCTGCGGAGGCGTCCCGAAGCCCAACACCTGGCGGATCCTAA

>GAHF01000023 *Hemiaspis signata* NP-Hem-3 mRNA sequence  
ATGGTCGGCCTCTCACGTCTGGCGGGCGGCGGGCTGCTGTTGCTGGTGTGGCCCTGCTGCCTCTCGCCC  
TCGACGGGAAGCCAGCGCCGCTGCCTCAGGCGATGTTCAAGGCTCCGGCGGGCGGCATGATGGCGTCGGG  
GCGGGAGCTGACGGAGAGGCAGAAGCTGCAACAGGAGCACCAAGCCGCTGCTGACGGAGGAGTCTTGGGT  
CCCGCGGCTGAGCGCAGCGGCTCCGAGACGGCCAAGCTAGGGGACGGCTGCTTCGGTGTCCCGATTGACC  
ACATCGGCAGCTCAAGCGGCATGGGCTGCGGAGGCGTCCCGAAGCCGACACCTGGCGGATCCTAA

>GAHF01000024 *Hemiaspis signata* NP-Hem-4 mRNA sequence  
ATGGTCGGCCTCTCACGTCTGGCGGGCGGCGGGCTGCTGCTGCTGGTGTGGCCCTGCTGCCTCTCGCCC  
TCGACGGGAAGCCGGCGCCGCTGCCTCAGGCGCTGCTCAAGGCTCCGGCGGGCGGCATGATGGCGTCGGG  
GCGGGAGCTGACGGAGCGGCAGAAGCTGCAACAGGAGCACCAAGCCATCGCAGACGGAGGAGTCTTGGGT  
CCCGCGGCTGAGCGCAGCGGCTCCGAGACGGCCAAGCTCGGGGACGGCTGCTTCGGCTCCCGCTCGACC  
GCGTCGGCAGCACGAGCGGCATGGGCTGCGGAGGCGTCCCGAAGCCCAACACCTGGCGGATCCTAA

>GAHF01000025 *Hemiaspis signata* NP-Hem-5 mRNA sequence  
ATGGTCGGCCTCTCACGTCTGGCGGGCGGCGGGCTGCTGTTGCTGGTGTGGCCCTGCTGCCTCTCGCCC  
TCGACGGGAAGCCAGCACCGCTGCCTCAGGCACTGCTCAAGGCTCCAGCGGGCGGCATGATGGCGTCGGG  
GCGGGAGCTGACGGAGAGGCAGAAGCTGCAACAGGAGCACCAAGCCGCCGAGACGGAAGAGTCTTCGGGT  
CCCGCGGCTGAGCGCAGCGGCTCCGAGACGGCCAAGCTAGGGGACGGCTGCTTCGGTGTCCCGATTGACC  
ACATCGGCAGCTCAAGCGGCATGGGCTGCGGAGGCGTCCCGAAGCCGACACCTGGCGGATCCTAA

>GAHF01000026 *Hemiaspis signata* NP-Hem-7 mRNA sequence  
ATGGTCGGCCTCTCACGTCTGGCGGGCGGCGGGCTGCTGCTGCTGGTGTGGCCCTGCTGCCTCTCGCCC  
TCTACGGGAAGCCGGCGCCGCTGCCTCAGGCGCTGCTCAAGGCTCCGGCGGGCGGCATGATGGCGTCGCG  
GCGGGAGCTGACGGAGCGGCAGAAGCTGCAACAGGAGCACCAAGCCGCCGAGAGGGAAGAGTCTTCGGGT  
CCCGCGGCTGAGCGCAGCGGCTCCGAGACGGCCAAGCTCGGGGACGGCTGCTTCGGCTCCCGATCGACC  
GCATCGGCAGCACGAGCGGCATGGGCTGCGGAGGCGTCCCGAAGCCGACACCTGGCGGATCCTAA

>GAHF01000027 *Hemiaspis signata* NP-Hem-9 mRNA sequence  
ATGGTCGGCCTCTCACGTCTGGCGGGCGGCGGGCTGCTGTTGCTGGTGTGGCCCTGCTGCCTCTCGCCC  
TCGACGGGAAGCCGGCGCCGCTGCCTCAGGCGATGTTCAAGGCTCCGGCGGGTGGCATGATGGCGTCGGG  
GCGGGAGCTGACGGAGAGGCAGAAGCTGCAACAGGAGCACCAAGCCATCGCAGACGGAGGAGTCTTCGGGT  
CCCGCGGCTGAGCGCAGCGGCTCCGAGACGGCCAAGCTCGGGGACGGCTGCTTCGGCTCCCGATTGACC  
ACATCGGCAGCTCAAGCGGCATGGGCTGCGGAGGCGTCCCGAAGCCGACACCTGGCGGATCCTAA

>GAHF01000028 *Hemiaspis signata* NP-Hem-11 mRNA sequence  
ATGGTCGGCCTCTCACGTCTGGCGGGCGGCGGGCTGCTGTTGCTGGTGTGGCCCTGCTGCCTCTCGCCC  
TCGACGGGAAGCCAGCACCGCTGCCTCAGGCACTGCTCAAGGCTCCAGCGGGCGGCATGATGGCGTCGGG  
GCGGGAGCTGACGGAGAGGCAGAAGCTGCAACAGGAGCACCAAGCCGCCGAGACGGAAGAGTCTTCGGGT  
CCCGCGGCTGAGCGCAGCGGCTCCGAGACGGCCAAGCTAGGGGACGGCTGCTTCGGTGTCCCGATTGACC  
ACATCGGCAGCTCAAGCGGCATGGGCTGCGGAGGCGTCCCGAAGCCGACACCTGGCGGGA

>GAHF01000029 *Hemiaspis signata* NP-Hem-12 mRNA sequence  
ATGGTCGGCCTCTCACGTCTGGCGGGCGGCGGGCTGCTGCTGCTGCTGCTGGCCCTGCTGCCTCTCGCCC  
TCGACGGGAAGCCAGCACCGCTGCCTCAGGCGCTGCTCAAGGCTCCGGCGGGCGGCATGATGGCGTCGGG  
GCGGGAGCTGACGGAGCGGCAGAAGCTGCAACAGGAGCACCAAGCCGCCGAGACGGAGGAGTCTTCGGGT  
CCCGCGGCTGAGCGCAGCGGCTCCGAGACGGCCAAGCTCGGGGACGGCTGCTTCGGCTCCCGATCGACC  
GCATCGGCAGCACGAGCGGCATGGGCTGCGGAGGCGTCCCGAAGCCGACACCTGGCGGATCCTAA

>GAHF01000030 *Hemiaspis signata* NP-Hem-13 mRNA sequence  
ATGGTCGGCCTCTCACGTCTGGCGGGCGGCGGGCTGCTGTTGCTGGTGTGGCCCTGCTGCCTCTCGCCC  
TCGACGGGAAGCCAGCACCGCTGCCTCAGGCACTGCTCAAGGCTCCAGCGGGCGGCATGATGGCGTCGGG  
GCGGGAGCTGACGGAGAGGCAGAAGCTGCAACAGGAGCACCAAGCCGCCGAGACGGAAGAGTCTTCGGGT  
CCCGCGGCTGAGCGCAGCGGCTCCGAGACGGCCAAGCTAGGGGACGGCTGCTTCGGTGTCCCGATTGACC  
ACATCGGCAGCTCAAGCGGCATGGGCTGCGGAGGCGTCCCGAAGCCGACACCTGGCGGATCCTAA

>GAHF01000031 *Hemiaspis signata* NP-Hem-14 mRNA sequence  
ATGATGGCTCGGAGCGGGAGCTGACGGAGAGGCAGAAGCTGCAACAGGAGCACCAAGCCATCGCAGACGG  
AGGAGTCTTGGGTCCCGCGGCTGAGCGCAGCGGCTCCGAGACGGCCAAGCTAGGGGACGGCTGCTTCGG  
TGTCCCGATTGACCACATCGGCAGCTCAAGCGGCATGGGCTGCGGAGGCGTCCCGAAGCCGACACCTGGC  
GGATCCTAA

>GAHF01000032 *Hemiaspis signata* PLA2-Hem-3 mRNA sequence  
ATGCTCTGCTGCTACCTTTTGGTCTCTTTGGCAGTTTGTGTCTCCTCTTAGGAGCTGCCAACATTGCTC  
CACAGCCTCTCAACCTCTATCAGTTCAAGAACATGATTGAATGTGCCAACCGTGGCAGTCAAGTTGGTT  
GGCTTATGCAAACTACGGTTGCTACTCGGGCTGGGGAGGTAGCGGGACACCTGTAGATGAGTTGGATACG  
TGCTGCAAAATACATGACGACTGATGTAGTTGAAGCCGAAAAAAGGATGCTACCCCAAGTTGACGTTGT  
ATACTTGGCAATGTACTGAAAATGTACCCACCTGCGATTCAAAAACGGGGTGTGAAGGTTCTGTGTGTGA  
TTGTGATGCCAAAGCAGCCATCTGCTTCGCCGAGGCCCTTACAACCTCTGCGAACATAAAAATCAACACC  
AAGACACGTTGCCAATGA

>GAHF01000033 *Hemiaspis signata* PLA2-Hem-7 mRNA sequence  
ATGTATCCTGCTCACCTTCTGGTCTGTTGGCAGTTTGTGTCTCCCTCTTAGGAGCCTCCGACATTTCGTC

CACAGCCTCTCAACCTCTATCAGTTCGGCAACATGATTGGATGTGCCAACCTAACACTCGAGGTTGGTC  
GGATTATGCAAACTACGTTTGTACTGCGGCTGGGGAGGTAGCGGGACACCGGTGGATGAGTTGGATAGG  
TGCTGCAAAATACATGACGACTGCTATGGTGAAGCCGAAAAAATTGCTTCCCCAAGTTGACGTTGTATA  
GTTGAAAATGTACTGAAAATGTACCCACCTGCGATTCAAAAAGGAGTGTGAAAGTTTGTGTGTGATTG  
TGATGCCAAAGCGGCATCTGCTTCGCCGAGCCCTTACAACCTCTGCGAACATAAAAAATCGACACCAAG  
ACACGTTGCCAATGA

>GAHF01000034 *Hemiaspis signata* PLA2-Hem-9 mRNA sequence  
ATGTCTCCTGCTCACCTTCTGTGCTGTTGGCAGTTTGTGTCTCCCTCTTAGGAGCCGCCAACATTCCTC  
CGCAGCCTCTCAACCTCGTACAATTAGCTACTTGATTCAATGTGCCAACCATGGCAGTCGTGCTACTTG  
GCATTATATGGACTACGTTTGTACTGCGGCTCAGGAGGTAGCGGGACACCGGTAGATGAGTTGGATACG  
TGCTGCAAAATACATGACGACTGCTATGGTGAAGCCGAAAAACAAGGATGCTCCCCAAGATGTTGGCGT  
ATGATTACTACTGTGGCGAAAATGGACCCCTACTGCAGAAATATCGAAAAGAAGTGTCAACGTATTGTGTG  
TGATTGTGACGTCAAAGCAGCCTTCTGCTTTGCCAAAGCCCTTACAACAACGCGAACTGGAATATCGAC  
ACCACTACACGTTGCCAATGA

>GAHF01000035 *Hemiaspis signata* PLA2-Hem-10 mRNA sequence  
ATGTCTCCTGCTCACCTTCTGTGCTGTTGGCAGTTTGTGTCTCCCTCTTAGGAGCCGCCAACATTCCTC  
CGCAGCCTCTCAACCTCGTACAATTAGCTACTTGATTCAATGTGCCAACCATGGCAGTCGTGCTACTTG  
GCATTATATGGACTACGTTTGTACTGCGGCTCAGGAGGTAGCGGGACACCGGTAGATGAGTTGGATACG  
TGCTGCAAAATACATGACGACTGCTATGGTGAAGCCGAAAAACAAGGATGCTCCCCAAGATGTTGGCGT  
ATGATTACTACTGTGGCGAAAATGGACCCCTACTGCAGAAATATCGAAAAGAAGTGTCAACGTATTGTGTG  
TGATTGTGACGTCAAAGCAGCCTTCTGCTTTGCCAAAGCCCTTACAACAACGCGAACTGGAATATCGAC  
ACCACTACACGTTGCCAATGA

>GAHF01000036 *Hemiaspis signata* PLA2-Hem-11 mRNA sequence  
ATGTCTCCTGCTCACCTTCTGTGCTGTTGGCAGTTTGTGTCTCCCTCTTAGGAGCCGCCAACATTCCTC  
CGCAGCCTCTCAACCTCATACAATTAGCTACTTGATTCAATGTGCCAACCATGGCAGTCGACCTACTTT  
GCATTATATGGACTACGTTTGTACTGCGGCTCAGGAGGTAGCGGGACACCGGTAGATGAGTTGGATACG  
TGCTGCAAAATACATGACGACTGCTATGGTGAAGCCGAAAAACAAGGATGCTCCCCAAGATGTTGGCGT  
ATGATTACTACTGTGGCGAAGATGGACCCCTACTGCAGAAATATCGAAAAGAAGTGTCAACGTATTGTGTG  
TGATTGTGACGTCAAAGCAGCCTTCTGCTTTGCCAAAGCCCTTACAACAACGCGAACTGGAATATCGAC  
ACCACTACACGTTGCCAATGA

>GAHF01000037 *Hemiaspis signata* SVMP-Hem-2 mRNA sequence  
ATGCAATATGAATTTACGCTGAATGGAGAGCGAGTGGTCTCTCACTTAGAAAGAAATAAAGGACTTTTTT  
CAGAAGATTACACTGAAACTCATTATGCCCTGATGGCAGAGAAATTACAACAAGCCCTTCGGTTCAGGA  
TCATTATATGACTACGGTTGCTACTGCGGCTCAGGAGGTAGCGGGACACCGGTAGATGAGTTGGATACG  
TTGAAAGGACATTTCAAGCATCGAGGGGAGACATACTTTATTGAGCCCTTGAAGCTTTCGACAGTGAAT  
CCCATTGCAATCTACAAAGATGAAATGTAGAAAAAGAGGATGAGATCCCCAAAATCTGTGGGGTAACCCA  
TACTACTTCGGAGTCAGATGAGCCCATCGAAAAGATCTCTCAATTAAACGAATGCTTCTCAACAAGACAGG  
TACTTTCAGGTCAAAAATACATTGAGTTGTATGTAGTTGTGGACAACAGAATGTACAGGAATTACAACA  
GCAACAGAGATGCTATAAATGAAAGAGTATGAAATGGTCAACACTTTAAATGTGATGTACAGACCTTT  
GAATTTTCTACTGCACTGATTGGCCCTAGAAAATTTGGACCAACCAAGATGAGATTAAAGCTTGAACAGAT  
GCGTCTGTCACTTTGAATCATTTGGAGATTGGAGAGAAACAGATTTACTGCCACGCGAGAAGGAATGATA  
ATGCTCAGTTACTTACGAGCATTTGACTTCAACGGAGCTACTGTAGGACTTGCTTACGTCGGCTCCCTCTG  
CAATCGAAGTACTCTGTAGCAGTTTATCTGAGATCATAGCAATAGAACCAAGCATAGTGGCATCTACAATG  
GCCCATGAGTTGGGTGATAATCTGGGCATTCAATCATGACAGGATTTCTGTAATTGCAAGTGTATAGGGT  
GCATTATGCTCGCACAATAAGTAATGAACCTTTCTATGAGTTCAGCAATTGTAGTATCCAGGAACATCA  
GAGTATCTTCTTAGAATCAGACCAATGCAATCTCAACAAACCCCTTGAGCACAGATATTGTTACACCT  
CCAGTTTGTGAAATTACTTAGTGGATGTGGGAGAAAGATGTGACTGTGGCTCTCCTGTGATGTGCAAA  
GTGCCCTGCTGCAATGCTACAACCTGTAACATGCAACATGAGGCACAGTGTGACTCTGGAGAGTGTGTTGA  
GCAATCGCAATTTACGGAAGCAGGAAGAGAAATGCCGGGCAGCAAGGATGACTGTGACTTGCCTGAAAGC  
TGCACTGGCCCAATCTGCTGAGTGTCCACGGACAGCTTCCAGAGGAATGGACATCCATGCCAACACAACC  
AAGGTTACTGCTACAATGGGACATGCCCCCTCATGACAAACCAGTGTATTGCTCTTGGGGGACAGGTGT  
AAATGTGCTCCAGATGGATGTTTTATGTCCAACCGGTATGGCCAAAGTTGTGGCTTCTGCAGAAATAGAA  
AATCGTAGAAAGATTCCATGTGCAGCAAGGATGTAAAGTGTGGCAAGTTTACTGCCAACAGGGAAACA  
ATGCATGCCCTGTCTATAATTATTACATGACCCAGATTCTGGAATGGTTAAACCTGGAACAAAATGTGG  
AGATGGAAGGTGTGTCATCAACAGGCAGTGTGTTGATGTGCAGACAGCCTACTGA

>GAHF01000038 *Hemiaspis signata* SVMP-Hem-3 mRNA sequence  
ATGATCCAAGCTCTCTTGGTAACTATATGCTTTGCGGTTTTTCCATATCAAGGGAGCTCTATCATCTGG  
AATCCGGGAATGTTAATGATTATGAAGTAGTATCCACAAAAGTGCTGCAATTGCCCAAAGGAGGAGT  
TCGAATCCTCAGCCAGAGACCAAGTATGAAGATACAATGCAATATGAATTTACGTGAATGGAGAGCGA  
GTGGTCTTCTCACTTAGAAAGAAATAAAGGACTTTTTTCAGAAAGATTACATGAAACTAATTATGCCCCG  
ATGGCAGAGAAATTACAACAAGCCCTTCGGTTCAGGATCACTGCTATTATCATGGCTACATTGAAATGA  
AGCTGATTCAAGTGCAGTCACTGATGCAACGGCTTGAAGGACATTTCAAGCATCGAGGGGAGACA  
TACTTTATTGAGCCCTGTAGCTTTCCGACAGTGAATCCCATGCAATCTCAAAGATGAAATGTAGAAA  
AAGAGGATGAGATCCCCAAAATCTGTGGGGTAACCCATACTACTTTCGGAGTCAGATGAGCCCATCGAAAA  
GATCTCTCAATTAAAGATGCTTCTCAACAAGACAGGTACTTGCAGGTCAAAAATACATTGAGTTGTAT  
GTAGTTGTGGACAACAGAATGTACARSAATTACAACAGCAACAGAGATGCTATAAATGAAAGAGTATATG  
AAATGGCCACTATGCTTGTTCTATTGCTA

>GAHF01000039 *Hemiaspis signata* SVMP-Hem-5 mRNA sequence  
ATGATCCAAGCTGTCTTGGTTACTATATGCTTAGTGGTTTTTCCATATCAGGTGAGCTCTACAATCCTGG  
AATCTGGGAAGGTAAGGATTAAGTATGATGTATCCACAAAATTCCTTCAATTGCCCAAAGGAGGACT  
TCAGAAGCTTGAGGAAAAGACCAAATATGAAGATACCATGAAATATGAATTTAAAGTGAATGGAGAGCCA  
GTGGTCTTAACTAGAAAAAATAAACGACTTTTTTCAAAAGATTACTGAGACTCATTATCCCCCTG  
ATGGCAGAGAAATTACAACAAGCCCTTCAGTTCAGGACCACTGCTATTATCATGGACATCCAGATGA  
TGCTGACTCAAGTGCAGTCACTAGGGCTTGTGATGGCTGAATGGGTATTTCAAGAATAACGGTGAGATG  
TACATTATTGAACCTTTGAAGCATCTGACGAT

>GAHF01000040 *Hemiaspis signata* SVMP-Hem-11 mRNA sequence  
ATGTGCAATAATGACATATCTGTAGGAGTTATTGAGATAACAGCTTCCAGGCAATTACAACCTGCAGCTG  
TAATGCTCCAGCTGGGTCAATTTCTGGTATGGATCATGATACAGATTCTGTGACTTGCAACATAGG  
ACCATGCATTATGGAACCCCTCAATAAATTTTAAACCTCCTCGGGAGTTCAGCTCTTGCAAGTTTCCGGGAT  
TATCAGAATTATATCATGACTGAAACTGCACAATGCATTCTCAATGACCCCTTGACGACAGATATTGTTC  
CAATTGCAATTTGTGGAAATGTTTTGTGGAAAGAGGAGAAGAATGTGACTGTGGCTTCAGAGATATG  
TAAAAATGAGTGTGTGAAGCTGCAACTTGTAAACTGAAACCTGAGGCAGAGTGTGCAAGTGGAGCATGT  
TGTGAGAAATGCCAGTTTAGGAGAGCTGGAGAAGTATGCCGGGCAGCAAGGATGACTGTGACTTTGATG  
AACTCTGCACTGGCCAATCTGCTGAGTGTCCCATGAATCTCTTCCATATGGATGGACCCCATGCCAAAA

CAACCAAGGTTACTGCTTCAGGGGGACATGTCCCACCTTAAAAAGCAATGCATTGCTCTCTGGGGGCCA  
GATGCAGAAGTGGCTCCAGATGGTTGTTTTATGAATAACCAGAAAGGGAAAGATTATGGCTACTGTAAAA  
AGGAAACCGTACAAACATTCCATGTGAACCAAGGATGTTAAATGTGGCAGGTTATACTGCATAGATGA  
TTCAACTGAAGAGAAAATCATGACTAAATTTTACTTTTACAAAACGAAAATGCCAATTTCCGAATGGTTG  
AACCTGGAACAAAGTGTAGGAGAAGGAATGGTCTGTGGCTCCGGGCAGTGTATTAACCTAGAAACAGCAC  
GATC

>GAHF01000041 Hemiaspis signata SVMP-Hem-7 mRNA sequence  
ATGTACAGGAATTACAAACACAGAGATGCTATAAATGAAAGAGTATATGTAATGGTCAACACTTTAA  
ATGTGATGTACAGACCTTTGAATTTTATCATTGCACGTATTGGCCTAGAAATTTGGACCAACCAAGATGA  
GATTAACATTGAACAGATGTGTCTGTCACTTTGAGATCATTGGAGATTGGAGAGAAACAGATTTACAG  
CCACGCAGAAGGAATGATAATGCTCAGTTACTTACGAGCATTGACTTCAACGGAGCTACTGTAGGACTTG  
CTTACGTGGGCACCGGTGCAGAATGA

**>GAHG00000000.1|GAHG01000000 TSA: Hoplocephalus bungaroides, transcriptome shotgun assembly, transcriptome shotgun assembly**

>GAHG01000001 Hoplocephalus bungaroides 3FTx-Hop-7 mRNA sequence  
ATGAAAACCTCTGCTGCTGACCTTCGTGGTGGTGACAATCGTGTGCCTGGACTTAGGTAAACAGCTTCTCAT  
GCTACAAAACACCTGGTGTAAATCTGAGCCTTGTGCACCTGGGGAGAACCTATGCTTTACAAAGACTTG  
GTGTGATGCTTTTTGTGGCCACAGAGGAAAGCGAGTCGAAATGGGATGTGCTGCTACTTGCCTACAGTG  
AAGCCCGTGTGGATATTATCTGTTGCTCAACAGACAATTGCAACCCATTTCCAACACACAACCTCTCGTT  
GA

>GAHG01000002 Hoplocephalus bungaroides 3FTx-Hop-9 mRNA sequence  
ATGAAAACCTCTGCTGCTGACCTTGGTGGTGGTGACAATCGTGTGCCTGGACTTAGGTGACAGCTTGATAT  
GCTACATGGGATATAATGCTCCTCAGACTTGTCCACCTGGGGAGAACCTATGCTTTACAAAGAGTTGGTG  
TGATGCTCACTGTGGCCAGAGAGGAAAGCGAATCGATTTGGGATGTGCTGCTACTTGCCTACAGTGAAG  
CCCGGTGTGGATATTAGCTGTGCTCAACAGACAAGTGCAACCCACATCCAAAACAGCAACGTCGTTGA

>GAHG01000003 Hoplocephalus bungaroides 3FTx-Hop-14 mRNA sequence  
ATGAAAACCTCTGCTGTTGACCTTGGTGGTGGTGACAATCGTGTGCCTGGACTTAGGATACACCATGACAT  
GTTGCAACCAACAGTCATCGCAACCTAAAACCACTAAAACGTGTGCAGAGAGCTCTTGCTATAAAAAGAC  
TTGGAGAGATCACCGTGGAACTATAATTGAAAGGGGATGTGGTTGCCCTCACGTGAAGCCCGGTATTCAA  
CTTGATGTGTTGCAAAACAGACGAATGCAACAATTAG

>GAHG01000004 Hoplocephalus bungaroides 3FTx-Hop-18 mRNA sequence  
ATGAAAACCTCTGCTGTTGACCTTGGTGGTGGTGACAATCGTGTGCCTGGACTTAGGATACACCATGACAT  
GTTGCAACCAACAGTCATCGCAACCTAAAACCACTAAAACCTTGTGCAGAGAGCTCTTGCTATAAAAAGAC  
TTGGAGAGATCACCGTGGAACTATAATTGAAAGGGGATGTGGTTGCCCTCACGTGAAGCCCGGTATTCAA  
CTTGATGTGTTGCAAAACAGACGAATGCAACAATTAG

>GAHG01000005 Hoplocephalus bungaroides 3FTx-Hop-22 mRNA sequence  
ATGAAAACCTCTGCTGCTGACCTTGGTGGTGGTGACAATCGTGTGCCTGGACTTAGGATACACCATGACAT  
GTTGCAACCAACAGTCATCGCAACCTAAAACCACTAAAACCTTGTGCAGAGAGCTCTTGCTATAAAAAGAC  
TTGGAGAGATCACCGTGGAACTATAATTGAAAGGGGATGTGGTTGCCCTCACGTGAAGCCCGGTATTCAA  
CTTGATGTGTTGCAAAACAGACGAATGCAACAATTAG

>GAHG01000006 Hoplocephalus bungaroides 3FTx-Hop-25 mRNA sequence  
ATGAAAACCTCTGCTGTTGACCTTGGTGGTGGTGACAATCGTGTGCCTGGACTTAGGATATACCATGACAT  
GTTGCAACCAACAGTCATCGCAACCTAAAACCACTATACCTTGTCCAATGATGTTTTGCTATAAAATGAC  
TTGGAGAGATCACCGTGGAACTATAATTGAAAGGGGATGTGGTTGCCCTCACGTGAAGCCCGGTATTCAA  
ATTGAATGTGTTGCAAAACAAACGAATGCAACAATTAG

>GAHG01000007 Hoplocephalus bungaroides fX-Hop-1 mRNA sequence  
ATGGCTCATCAGCTACTCCTCTGTCTGATCCTCACTTTTCTGTGGAGTGTCCAGAGGCTGAAAGTAATG  
TATTTCTAAAAAGCAAAGTGGCAAATAGATTTTGCAGAGAAACAAACGATCTAATTCATGTTTGAGGA  
AATTAGACCTGGAAACATTGAAAGGGAATGCATTGAGGAGAAATGTTCAAAAGAAAGACCTGAGGGAGGTA  
TTTGAAGATAACGAGAAAACTGAGACCTTCTGGAATGTTTATGTAGATGGGGATCAGTGTTTCATCAAACC  
CCTGTCTATTATCACGGGACATGCAAGATGGCATTGGTAGCTATACCTGTACCTGCTTGCCTAACTATGA  
AGGAAAAAAGCTGTGAAAAAGTCTTATTTAAGTCCCTGCAGAGCGTTCAATGGTAACTGTTGGCACTTCTGC  
AAACGTGTTCAAAGTGAAACTCAGTGTTTCATGTGCTGAAAGTTACCGTTTGGGAGTTGATGGGCACTCTT  
GTGTTGCTGAAGGTGACTTTTCATGTGGTAGAAATATAAAGCAAGGAACAAGAGGGAAGCAAGTCTGCC  
TGACTTTGTGTGAGTCCCGAGAGGCAACCTTTGCTGAAAAAATCTGATAATCCAAGCCCTGATATCAGAAAT  
GTTAATGGAATGGACTCCAACTGGGTGAATGTCATGGCAGGCAGTCTGATAAATGAAAAAGGAGAAG  
TGTTTTGTGGAGGAACAATTTTGGAGATCCCATCATGTGCTTACTGCAGGCCACTGCATTAACAGACCAA  
GAGCGTTTCAGTTATTGTAGGGAAATAGACATATCAAGAAAAAGAACCCAGTCTTCTTTCTGTGGA

>GAHG01000008 Hoplocephalus bungaroides KP-Hop-3 mRNA sequence  
ATGTCTTCTGGAGGTCTTCTTCTCCTGCTGGGACTCCTCACCTCTGGGAGGTGCTGACCCCCGTCTCCA  
CTAAGGACCGTCCAGAGTTCTGTGAACCTGCCTGATGACTCCGACCATGTAGAGGCATCTTCCATGCCTT  
CTACTACAATCCAGATCAACGTATGCTAGAGTTTATTTATGGTGGATGCTATGGGAATGCTAACAAAT  
TTTAAGACCATAGATGAATGCAACGCATCTGTGCTGCATGA

>GAHG01000009 Hoplocephalus bungaroides KP-Hop-7 mRNA sequence  
ATGACGTGCGAGAAAAAGTCTGGCGCTGTTGATCACGTTGGCGGCTGCGCTGGCGGCCGAGAGTCGCCGC  
CAGGCCGATGCCACTCGCCCAGACAGTGGGGCCTTGTCCGGGCATCCTTCCATCGGTGGTGGTACAATGC  
CACGATGCAGATGTGCGAGGAATTCATTTTTGGAGGTTGCAAGGCAATGCCAACAACTTTGTCTCCAAA  
CAGGACTGCTTCCAGACGTGTATCAGAGGAGGGGCTGCAGAGGCAACAGTGGTATCTAGCGGGCCAGCCA  
CTGAAGTGGCTACACCAAGAGCTGGACATCTCCAGAGGCCTACGAAAAACAGGCCTGGCTTCAGAGAAAT  
CTGTGCTGCGCCCGGGTGGTAGGTCCTGCGGGGCTCCTTCTCGTTGGTACTTTGACCTAGAGAGC  
CGGATGTGCAAGATGTTTCGTCTATGGGGGCTGTCGTGGCAACAAGAACAACTATCTCTTCAAGAGCACT  
GCTGGAGCCAGTGACAGGTGATGGAGAGATAACTGAAGAGCCAGGAGATGCAAGCGCCAGCCTCCCT  
CCCTCCGAACCTTCAGATCTCCACAGAGCTGTGGTCTTGGCTCCTTCTGGCCATCCTGGTGACT  
ATCCTGCTGGGCTCGATGGGGGTTTTCTTTGTTAAGATCTGCCGAAGAACCAGGAGTTGTGAGTGGGAA  
CGAGTGTGGAGCACGCTGGATGA

>GAHG01000010 Hoplocephalus bungaroides KP-Hop-9 mRNA sequence  
ATGTCTTCTGGAGGTCTTCTYCTCCTGCTGGGACTCCTCACCTCTGGGAGGTGCTGACCCCCGTCTCCA  
GCAAGGACCGTCCAAAGTTCTGTGAACCTGCCTGCTGACTCCGATCATGTAAAGGCAACTTCAAGCCTT

>GAHG01000011 *Hoplocephalus bungaroides* KP-Hop-11 mRNA sequence  
ATGTCCTTCTGGAGGTCTTCTTCTCCTGCTGGGACTCCTCACCCTCTGGGAGGTGTTGACCCCCGTTTCCA  
GCAAGGACCGTCCACACTTCTGTCATCTGCCTCATGAACCCGGACCATGTAAACGCAACACCCAAGCCTT  
CTACTACACCCAGTTTATCATACATGCCTAAGCTTTATTTATGTGGATGCGAAGGGAATCTACAAT  
TTTAAGACCATAGATGAATGCAACCGCACTGTGCTGATTGATA

>GAHG01000013 *Hoplocephalus bungaroides* LP-Hop-1 mRNA sequence  
ATGGGGCGAATCTCTCTTGGTAGCGCTGAGCTTGCTGGTGCTGACTTTATCCCTAAATGGAATTTGGAGCTG  
ATCATCATTTGTCCTCCGAGCTGATCATCTCTTGGGAAGTTTGGTCACAAGTGTCATCAGAGAATGGGAAGAC  
CTGGGAAGATCTCCGAGGCATCTCTCGCTGCAGCTTTCAGAAACAGCAGCCATCTGGCCCTCCATCCACAGCCTA  
GCAGAGTCCCTTTCCATCCAAACGGCGATCTCCAGGAGACTGGTCTTCACTGATGTCTGGATTTGGACTGA  
ATGCTCCAGGGAAGAAATCGCACTCGGGAGTGGACTGATGGCTCCGAAATTTGATTATACATCTCGGGAAT  
ATTTGAACCCGCGAATACTGATCGTAGGAGTAGTATCGCTCAAGTTGAGAAGTGTCCTCAAGGCATTCTAGA  
TGGGAAGCTGCCAAGTGTGAATCCAAAGATCGTTTCACTGTCAGCAAGATTAG

>GAHG01000015 *Hoplcephalus bungaroides* NP-Hop-00039 mRNA sequence  
ATGCTCGGCCTCTCAGCTCTGTGGCGGCGCGGGCTGCTATTGGTGTCTGGCCCTACTGCTCTTGGCCC  
TCGACGGGAAGCCGGCGCCACCCGCTCAGGCGCTGCCACAGGCTCCGGCGGGCGGATGATGGCGTCGCG  
GCCGGTGCTGCAGGAGCAGCAGGAAGCAGCAGCAGCAGCAGCAGCAGCAGCAGCAGCAGCGCTGCTCCGC  
TCTGGCGCCCGCAGCAGTGGAGGATCTCTGGGTCCCGCGCTGAGCGCAGCGGCTCAAGACGGCCCAAGA  
TCGGGACGGCTGCTCTGGCCTCCCGATCGACCGCATCGGCACGACGAGCGGCATGGGCTCGGAAGCGT  
CCCCAAGCCGACCTGGCGGATCTTAA

>GAHG01000016 *Hoplistcephalus bunganoides* NP-Hop-00040 mRNA sequence  
ATGGCTCGGCCCTCTCACAGCTCTGCGGGGCGCGGGTGTGCTGCTGCTGCGCCCTGTGCTCCTCTGCCTCTGC  
ACGGGAAACCGCGCGCGCCCTCAGGCGCTGCCACGGCTCAGCGGGCGGCATGATGGCGTCTCGCGGCC  
GGTGTCTGACGGAGACGACACGAGCAGCAGCAGCAGCAGCAGCAGCAGCAGCAGCAGCGCTGCTGCGCGCTG  
CCCGCGCCGACGATGGAGGATCTCTCGGTCTCCGCGGCTGAGCGCAGCGGCTCAAAGACGGCCAAAGATCG  
GGGACGGCTGCTTCGGTGTTCAGGCTCGACCGCATCGGCAGCAGCAGCGGCATGGGCTGCGGAGGCGTCCC  
GAAGCGACACCTGGCGGATCTTAA

>GAHG01000017 *Hoplcephalus bungaroides* NP-Hop-00061 mRNA sequence  
ATGGTTCGGCCTCTCAGCTCTGTGGCGGCGCGGGTGTGCTGCTGCTGCTGGCCCTGCTGCTGCCTATCGCCC  
TCGACGGGAAACCGGCGCCGCCCTCAGGCGCTGCCACGGCTCCGGCGGGCGGATGATGAGCGTCGCG  
GCGGCTGCTGACGGAGCAGCAGAAGCAGCAGCAGCACCACGAGCAGCAGCAGCGCTGCTCGCCCTCGCG  
CCCTGCAGATGAGGAGGATTCCTCGGTCCTCCGCGCTGAGCGCAGCGGCTCCAAGACGGCCAAAGATAGGGG  
ACGGCTGCTCTCGGCTCCGATCGACCGCATCGGCAGCAGCAGGCGCATGGGCTCGGAGGCGTCCGAA  
CGGCACACCTGGC

>GAHG01000018 *Hoplistcephalus bungaroides* NP-Hop-00064 mRNA sequence  
ATGGTTCGGCCTCTCACGTCTGCGCGGCGCGCGGGTGTGTTGCTGCTGCTGCTGGCCCTGCTGCCTATCGCCC  
TCGACCGGAAACCGGCGCGCGCGCTCAGGCGCTGCCACAGGCTCCGCGCGGCGGCGATGATGGCGTCGCG  
CGCGGTGCTGACGGAGCAGCAGAGCAGCAGCAGCACCACGAGCAGCAGCAGCGCTGCTCGCGCTCGCG  
CCGCGCAGCATGAGGAGGATCTCTCGGTTCCGCGGCTGAGCGCTCAGCGGCTCAAGACGCGCCAAGATAGGG  
ACGGCTGCTTCGGCCTCCGATCGACCGCATCGGCAGCAGAGCGGCATGGGCTCGGAGCGGTCCGAA  
GCGACACCTGCGCGGATCCTAA

>GAHG01000019 *Hoplocephalus bungaroides* NGF-Hop-1 mRNA sequence  
ATGTTGTGTGCACCTCTGATTATTGCATTTCTGATTGGCATATGGGCAGCACCAAAATCTGAGGATAATG  
TCCCTCTGGGCTCCCTGCACACATCTGACCTTTCTGACACCCAGCTGTGCTCAAACATCATGAGGGTCTGAA  
AACATCTCGAAATACAGATCAGCGCCATCCTGCTCCTAAGAAGGCAGAGGATCAAGAACTTGGATCAGCA  
GCCAACATCATTTGTGAATCCAGAGCTTTTTCAGAGAGGCGGTTTCTGAGTCACTCTGTTTCTGTTTCAGTA  
CTCAGCCCCACCGTTGTCAAGAGATGACGAAAGTGTGGAAGTTCTGTGCAACATGAAGACGCTCTTAAACAG  
GAATATCCGGGGCCAAACGTGAAAATCATCCTGTGCATAACAGAGGGGAACATTCTGTGTGTGACAGTATC  
AGTGTCTGGGTTACCAACAAAAACCAAGACACCGCATCAAGAGCAATATGGGTGACTGTGATGTGGTGATG  
TAATCTCTAATAATGAAGTCTACAAGCAGTACTTTTGGAAACCAAGTGACGAATCCAAATCTCCAGTATC  
GAGTGGGTGCAGGGGCACTGATTCCAGGCATTGGAATTTCTTATTGCACCACAACACAGACATTTGTCAGG  
GCATTAAACCATGGAAGGCAATCGGGCATCTGGCGCTTCATTTCGGATTGACACTGCCTGTGTGTGCGTAA  
TAATTAGAAAAATCTGACAACTTCTGA

>GAHG01000020 *Hoplocephalus bungaroides* NGF-Hop-2 mRNA sequence  
ATGTTTGTCCTCACTCTGATTATTGCATTCTCTGATTGGCATATGGGCAGACCAAAATCTGAAGATAATG  
TCCCTCTGGGCTCCCCCTGCAACATCTGACCTTTCTGACACCCAGCTGTGCTCAAACATCATGAGGTCTGAA  
AACATCTCGGAATACAGATCAGACCACTCTGCTGCTCTAAGAAGGCAGAGGATCAAGAATCTGGATCAGCA  
GCCAACATCATTTGTGGATCCCAAGCTTTTTCAGAAAGAGCGTTTCCAGTCACTCTGTTTCTGTTTACAGTA  
CTCAGCCCCCACCCTTGTCAAGAGATGAGCAACAGTGGAGTTCTTGGACAATGAAGACGCTCTTAACGA  
GAATATCCGGGCCAAACGTGAAATCATCTCTGTCATAACAGAGAGGGAACATCTGTGTGTGACAGTATC  
AGTGTCTGGGTACCAACAAAACCAAAGCAACGGACATCAAAGGCAATATGGTGACTGTGATGGTGGATG  
TAAATCTTAAATGAAGTCTACAAGCAGTACTTTTGTGAACCAAGTCAGAAATCTCAAACTCAGTACC  
GAGTGGGTGCAGGGGCCATGATTTCTCAGGCATTGGAATCTTTATTGCACCACCAACACAGACATTTGTGAG

GCATTAAACCATGGAAGGCAATCGGGCATCTGGCGCTTCATTTCGGATTGACACTGCCTGTGTGTGCGTAA  
TCATTAGAAAAACTGACAACCTTCTGA

>GAHG01000021 Hoplocephalus bungaroides NGF-Hop-3 mRNA sequence  
ATGTTGTGCTACACTCTGATTATTGCATTTCTGATTGGCATATGGGCAGCACCAAAATCTGAGGATAATG  
TCCCTCTGGGCTCCCCTGCAACATCTGACCTTCTTGACACCAGCTGTGCTCAAATTCACGAGGGTCTGAA  
AACATCTCGAAATACAGATCAGCGCCATCCTGCTCCTAAGAAGGCAGAGGATCAAGAACTTGGATCAGCA  
GCCAAGCATCTGTGGATCCCAAGCTTTTTCAGAAGAGGCGTTTCCAGTCACCCCGTGTTCTGTTTCAGCA  
CTCAGCCCCCACCCTGTGTCAGAGATGAGCAAAGTGTGGAGTTCCTCGACAATGAAGACGCTCTTAACAG  
GAATATCCGGGCCAAACGTGAAAATCATCTGTGCATAACCAAGGGGAACATTCTGTGTGTGACAGTGTG  
AGTGACTGGGTATCAAAACACAGCAACGGACATCCACGGCAATATGGTGACTGTGATGGAGGACATAA  
CTCTTAATAATGAGGTCTACAAGCAGTACTTTTGTGAAACCAAGTGCAGAAATCCAAATCCAAATCCACT  
ACAGAGTGAGTGCAGGGGCATTGATTCCGGGCTTTGGAATTTCTATTGCACCAGAACACAGACATTTGTC  
AAGGCATTAAACCATGGTAGGCAATCAGGCATCTTGGCGCTTCATTCTGATTGACACTGCCTGTGTGTGCG  
TAATCATTAGAAAACTGACAACCTTCTGA

>GAHG01000022 Hoplocephalus bungaroides NGF-Hop-4 mRNA sequence  
ATGTTGTGTTACACTCTGATTATTGCATTTCTGATTGGCATATGGGCAGCACCAAAATCTGAGGATAATG  
TCCCTCTGGGCTCCCCTGCAACATCTGACCTTCTTGACACCAGCTGTGCTCAAATCATGAGGGTCTGAA  
AACATCTCGAAATACAGATCAGCGCCATCCTGCTCCTTAAGAAGGCAGAGGATCAAGAACTTGGATCAGTA  
GCAAACATCATGTGTGATCCCAAGCTTTTTCAGAAGAGGCGTTTCCAGTCACTCTGTTCTTTTCAGCA  
CTCAGCCCCCACCCTGTGTCAGAGATGAGCAAAGTGTGGAGTTCCTCGACAATGAAGACGCTCTTAACAG  
GAATATCCGGGCCAAACGTGAAAATCATCTGTGCATAACCAAGGGGAACATTCTGTGTGTGACAGTGTG  
AGTGATTGGGTATCAAAACACAGCAACGGACATCCACGGCAATATGGTGATGTGATGGAGGACATAA  
ATCTTAATAATGAGGTCTACAAGCAGTACTTTTGTGAAACCAAGTGCAGAAATCCAAATCCAAATCCACT  
ACAGAGTGAGTGCAGGGGCATTGATTCCAGGCTTTGGAATTTCTATTGCACCAGAACACAGACATTTGTC  
AAGGCATTAAACCATGGCAGGCAATCAGGCATCTTGGCGCTTCATTCTGATTGACACTGCCTGTGTGTGCG  
TAATCATTAGAAAACTGACAACCTTCTGA

>GAHG01000023 Hoplocephalus bungaroides PLA2-Hop-6 mRNA sequence  
ATGTATCCTGTTACCTTCTGGTCTCTGGCAGTTTGTGTCTCCCTCTTAGGAGCCTCCAACATTCCTC  
CGCGGCTCTCAACCTCTATCAGTTCAAGAACATGATTCCATGTGCCAACCATGGCCGAAGACCTACTTG  
GCATTATATGACTACGGTTGCTACTGCAGCTCAGGAGGTAGCGGGACACCCGTAGATGAGTTGGATAGG  
TGCTGCAAAACACATGAGGACTGCTATACTAACATCGGAACATCCAAATGCAACCCCCAAGTCGCAGATTT  
ATACTTGGCAATGTGGCAGCGATGGACCACTGCGACGATTCAAAAACAGGATGTGAACGTTCTGTGTG  
TGAATGTGATGCCGACGACGCAAGTGCTTTGCCAAAGCCCCCTTACAACCAGGAAAACTGGAATATCGAC  
ACCAAGAAACGTTGCCAATGA

>GAHG01000024 Hoplocephalus bungaroides PLA2-Hop-7 mRNA sequence  
ATGTATCCTGTTACCTTCTGGTCTCTGGCAGTTTGTGTCTCCCTCTTAGGAGCCTCCAACATTCCTC  
CGCGGCTCTCAACCTCTATCAGTTCAAGAACATGATTCCATGTGCCAACCATGGCCGAAGACCTACTTG  
GCATTATATGACTACGGTTGCTACTGCAGCTCAGGAGGTAGCGGGACACCCGTAGATGAGTTGGATAGG  
TGCTGCAAAACACATGAGGACTGCTATACTAACATCGGAACATCCAAATGCAACCCCCAAGTCGCAGATTT  
ATACTTGGCAATGTGGCAGCGATGGACCACTGCGACGATTCAAAAACAGGATGTGAACGTTCTGTGTG  
TGAATGTGATGCCGACGACGCAAGTGCTTTGCCAAAGCCCCCTTACAACCAGGAAAACTGGAATATCGAC  
ACCAAGAAACGTTGCCAATGA

>GAHG01000025 Hoplocephalus bungaroides PLA2-Hop-8 mRNA sequence  
ATGTATCCTGCTCACCTTCTGGTCTCTGGCAGTTTGTGTCTCCCTCTTAGGAGCCTCCAACATTCCTC  
TGCGGCTCTCGAACCTCTATGCAATTCAGCAACATGATTCAATGTGCCAACCATGGCAGTCGACCTACTTC  
GCATTATGCGGACTACGGTTGCTACTGCGGCAAGGAGGCAGCGGGACACCCGTAGATGAGTTGGATAGG  
TGCTGCAAAACACATGATGACTGCTATGCTAAAGCCAAAAAATGCTCCCCCAAGCTGTGTTGTATAGTT  
GGCGATGTAGCCGAATGTACCCTCTGCAAAAGATTCAAAAACGGGATGTAAAGGTGTTGTGTGTGATTG  
TGACGCCAAAGCAGCCAAGTGCTTTGCCAAAGCCCCCTTACAACGACGCGAACTGGGATATCGACACCAAG  
ACACGTTGCTAA

>GAHG01000026 Hoplocephalus bungaroides PLA2-Hop-9 mRNA sequence  
ATGTATCCTGCTCACCTTCTGGTCTCTGGCAGTTTGTGTCTCCCTCTTAGGAGCCTCCAACATTCCTC  
TGCGGCTCTCGAACCTCTATGCAATTCAGCAACATGATTCAATGTGCCAACCATGGCAGTCGACCTACTTC  
GCATTATGCGGACTACGGTTGCTACTGCGGCAAGGAGGCAGCGGGACACCCGTAGATGAGTTGGATAGG  
TGCTGCAAAACACATGATGACTGCTATGCTAAAGCCAAAAAATGCTCCCCCAAGCTGTGTTGTATAGTT  
GGCGATGTAGCCGAATGTACCCTCTGCAAAAGATTCAAAAACGGGATGTAAAGGTGTTGTGTGTGATTG  
TGACGCCAAAGCAGCCAAGTGCTTTGCCAAAGCCCCCTTACAACGACGCGAACTGGGATATCGACACCAAG  
ACACGTTGCTAA

>GAHG01000027 Hoplocephalus bungaroides PLA2-Hop-15 mRNA sequence  
ATGTATCCTGCTCACCTTCTGGTCTCTGGCAGTTTGTGTCTCCCTCTTAGGAGCCTCCAACATTCCTC  
CGCGGCTCTCGAACCTCTATGCTTCAAGAACATGATTCAATGTGCCAACCATGGCAGTCGACCTTCTTG  
GGCTTATGCGCACTACGGTTGCTACTGCGGCAAGGAGGCAGCGGGACACCCGTAGATGAGTTGGATAGG  
TGCTGCAAAACACATGACGACTGCTATGCTAAAGCCAAAAAATGCTCCCCCAAGCTGTGTTGTATAGTT  
GCTCTTACTACAACATGTATAAATACAAAATGTAATGAAGGCGAACTCACCTGCCAAGCGGACAACGATGA  
GTGTAAAGCCTTTATCTGTAATTGTGACCGCACAGCAGCCATCTGCTTCGCCGGAGGCCCTTACAACCAG  
GAGAAGTTCATGATCTCCAGCAAGACACATTGCCAATGA

>GAHG01000028 Hoplocephalus bungaroides PLA2-Hop-18 mRNA sequence  
ATGTATCCTGTTACCTTCTGTGCTCTGTTGGCAGTTTGTGTCTCCCTCTTAGGAGCCTCCAACATTCCTC  
CGCAGCTCTCAACCTTGAACAATTCGACAAACATGATTGAATGTGCCAACCATGGCAGTCGACCTTCTTG  
GCATTATATGACTACGGTTGCTACTGCGGCAAGGAGGTAGCGGGACACCCGTAGATGAGTTGGATAGG  
TGCTGCAAAACACATGAGGACTGCTATGCTAAAGCCAAAAAATGCTCCCCCAAGCTGTGTTGTATAGTT  
ATAGTTGGAATGTGGCAGCGATGGACCCCACTTGCATGGCAACAATGAGTGTAAAGCCTTTATCTGTAA  
TTGTGACCGCACAGCAGCCAAGTGCTTTGCCAAAGCCCCCTTCAACCAGGAAAACTGGGATATCGACACC  
GAGACACATTGCCAATGA

>GAHG01000029 Hoplocephalus bungaroides SP-Hop-3 mRNA sequence  
ATGTTGATCAGGCTGAACATGTTCTGTTAACTATAGTGAAACATATCGCACTCTTAGCTTGCCCTCCAACC  
CTCCCAGGATGGGCTCAGTTTGGCGTGTATGGGCTGGGGCTCAATCACAACCTTCTAATGTGACTTATCC  
CGAAGTCCCTCATTGTGTGACATTAAACATACTCCATAATCCGGTGTGTCAAGCAGCTTACCCATCAATG  
TCAGGAAGAAACACATGTGTGCGGGTATCCTGGAAGGAGGCAAGATTCATGTAAGGCGATCTGGGG  
GACCCCTCATCTGTAATGGACAAATCCAGGGCATTGTATCTTGGGGGCACTTTCCTTGTGCCCTACTTCT  
TGAACCTGGCGTCTACAGCAAGGTCTTCGATTATAAGGACTGGATTGAGGGTATTATTGCAGGAAATTC  
AACGCGATCTGCCCTAG

>GAHG01000030 Hoplocephalus bungaroides SVMP-Hop-13 mRNA sequence  
ATGTCTGCGATAATAAGTAATGAACCTTTTTCTAAGTTCAGCAATTGTAGTGTCCAGGAACATCGGGAGT  
ATCTTCTTAGAGACAGACCACAATGCATTCTCAATAATCCCTTGAGCACAGATATTGTTACACCTCCAGT  
TTGTGGAAATTACTTTAGTGGAGGTGGGAGAAGAATGTGACTGTGGCTCTCCTCAGGATTGTCAAGATGCC  
TGCTGCAACGCTGCAACTTGTAACTGCAACACGACTGTGACTCCGGAGAGTGTGTGAGAAATGCAAAAT  
TTAAGAAAGCAGGAGCACAATGCCGGGCAGCAAAGGATGACTGTGACTTGCCCTGAAAGCTGCACTGGCCA  
ATCTGCTGAGTGTCCACCGGATGTAGATTAAACAGAGGATGGACATCCATGCCAAAACAACAGGGTTACTGC  
TACAATGGGAAATGCCCCATCATGACAAACAGTGTATTGCTCTAAAGGGGCCAGGTGTAATGTGTCTC  
CAGATGAATGTTTTACGTCGAAACAGAATGACCCACGTTGTGGCTTCTGCAGAATAGAAAATGGTAGAAA  
GATTCCATGTGCAGAAAAGGATAAAATGTGTGGCAAGTTATTATGCCAAAAGGGAACGCGATATGCATC  
TGCTTTCTACAACAGATGACCCAGATTATGGAATGGTTGAACCTGGAACAAAATGTGGAGATGGAAGG  
TGTGCATCAACAGGCAGTGTGTTGATGTGCAGACAGCCTACTGA

>GAHG01000031 Hoplocephalus bungaroides SVMP-Hop-14 mRNA sequence  
ATGGTCAACACTTTAACTGTGATGTGCAGACCTTTGAATTTTTTCATTGCACTGATTGGCCTAGAAATTT  
GGACCAACCAAGATGAGATTGAGATTAAACAGAGGTGGCTGTCACTTTGAATCATTTGGAAAATGGAG  
AGAAACAGTTTTACTGCCACGCAAAAGGAATGATAATGCTCAGTTACTTACGGGCATTGACTTCAATGGA  
ACTACTGTAGGACGCTGCTCACGTCCGCTCCCTCTGCAGTCCGAAGAAATCTGTAGCAGTTATTTCAGGATC  
ATAGCAAAAAGAACCAAGCATGGTGGCATCTACAATGGCCCATGAGTTGGGTCTAATCTGGGCATTTCATCA  
TGACAACGCTTCTGTAAATTGCAGTGTGGACCATGCATTATGTCTGCGAGAGCAAGTCATGAACCTGCC  
TATGAGTTTCAGCAATTGTAGTGTCCAGGAACATCGGGAGTATCTTCTTAGAGACAGACCACAATGCATTCT  
TCAACAAAACCTTTGAGAAGGGATATTGTTACACCTCCAGTTTGTGGAAATTACTTAGTGGAGCGGGGAGA  
AGAATGTGACTGTGGCTCTCCGAGGATTGTCAAAATGCCTGCTGTAATGCTGCAACTGTAAACTGCAA  
CACGAGGCACAGTGTGAGTCTGGAGTGTGTTGTGAGAAAATGCAAATTTAAGAAAGCAGGAGCAGAATGCC  
GGGCAGCAAAAGGACGACTGTGACTTGCCTGAAAGCTGCATGGCCAAATCTGTCTAAGTGTCCCGGACAG  
CTTCCAGAGGAATGGACATCCATGCCAAAACAACAGGGTTACTGCTACAATCGGAAATGCCCCCTCATG  
ACAAACCAAGTGTATTGCTCTCGGGGACCAGGTGTAATGTGTCTCCAGATAGATGTTTTACGATCAACC  
AGAGGGGCAGAGGTTGTGGCTTGTGCGAAGATAGAAAATGGTACAAAGATTCCATGTGCAGCAAAAGGATAA  
AATGTGTGGCATGTTTACTGCGAAAAGGGAAACACGACATGCACCTGCTTTACTACAACAGATGACCCA  
GATTATGGAATGGTTGATCCTGGAACAAAATGTGGAATGGAAGGTGTGCATCAACAGGCAGTGTGTTG  
ATGTGCAGACAGCCTACTGA

>GAHG01000032 Hoplocephalus bungaroides SVMP-Hop-15 mRNA sequence  
ATGAGTTGGGTCGATAATCTGGGCATTCATCATGACACGCTTCCTGTAATTGCAGTACTGGACCATGCA  
TTATGTCTGCGATAATAAGTGATGAACCTCTCTATGAGTTCAGCTCCTGTAGTGTCCAGGAACATCAGAG  
GTATCTTCTTAGACACAGACCACAATGCAGTCTCAACAAACCTTGAGCACAGATATTGTTGCACCTCCA  
GTTTGTGGAAATTACTTTGTGGAGGTGGGAGAAGAATGTGATTGCGGCTCTCCTGCGGATTGTCAAAGTG  
CCTGTGTCAATGCTGCAACTTGTAACTGCAACATGAGGCACAGTGTGACTCCGGAGAGTGTGTGAGAA  
ATGCAAAATTTAAGAAAGCAGGAGCAGAATGCCGGGCAGCAAAGGATGACTGTGACTCACCTGAAAGCTGC  
ACTGGCCAAATCTGCTGAGTGTCCCACGAGCAGCTTCCAGAGGAATGGACATCCATGCCAAAACAACCAAG  
GTTACTGTCTACAATGGGAAATGTCCCATCATGACAAACCAATGTATTGATCTCTGGGGGCCAGGTGTAAA  
AGTGTCTTCAGGTATATGTTTTACATTGAACCAGAATGGCCGAAGTTGTGGCTTCTGCAGAATAGAACAT  
GGTACAAAGATTCCATGTGCAGCAAAAGGATGTAAAGTGTGGCAGTTATTTTGCAAAAGAGAAAACCTCGA  
TGATATGCAGCTGCAAGTTTTATCATCATGACCCAAGTYRTGGAATGGTTGAACCTGG

>GAHG01000033 Hoplocephalus bungaroides SVMP-Hop-18 mRNA sequence  
ATGATCAACACTTTAAATATGATGTACAGATCTTTGAATTTTTTCATTGCACTGATTGGCCTAGAAATTT  
GGACCAACCAAGATAAGATTAAAGTTGAACAAGAGGCGAATGTCACTTTGAATCATTGGAGAATGGAG  
AGAAACAGTTTTGTCTGCCACGCAAAAGGAATGATAATGCTCAGTTACTTACGGGCATTGACTTCAACGGA  
AGGACTCTAGGACTTGGCTTACGTCCGCTCCCTCTGCCTTCCGATGCACCTCTGTAGCAGTTATTGAAATT  
ATAGCAGAGACACAAGAATAATGGCATCTATAATGGCCCATGAGTTGGGTCTAATCTGGGCATTAAATCA  
TGACAACTTCTCCTGTTAGTTGAGTGTGACCATGCATTATGTCTAAGACAGTAAGTCATGAACCTCTC  
TATGACTTTCAGCAATTGTAGTGTCCAGGAACATCAGAGGTATCTTCTTAGAGTCAGACCACAATGCATTCT  
TCAACAAAACCTTGAGCACAGATATTGTTACACCTCCAGTTTGTGGAAATTACTTAGTGGAGAGGGGAGA  
AGAATTGTGATTGTGGCTCTCCTCAGGATTGTCAAGATGCTGCTGCAACGCTGCAACTGTAAACTGCAA  
CACGACTGTGACTCCGGAGAGTGTGTGTGAGCAATGCAAAATTTAAGAAAGCAGGAGCACAATGCCGGGCAG  
CAAAGGACGACTGTGACTTGCCTGAAAGCTGCCTGAGTGTGCTGAGTGTCCACGGACAGCTTCCA  
GAGGAATGGACATCCATGGCAAAGCAACAGGGTTACTGCTACAATGGGAAATGCCCATCATGACAAAAC  
CAGTGTATTGCTCTAATGGGGCCAGGTGTAAATGTGTCTCCAGATGATTGTTTTACGTGGAACAGAAATG  
ACCCAGATTGTGGCTTCTGCAGAATAGAAAATGGTAGAAAGATTCCATGTGCAGAAAAGGATAAAATGTG  
TGGCATGTTAGTATGCGAAAAGAGAAAACCGAAATGCACCTGCTTTACTACAACAGATGACCCAGATTAT  
GCAATGGTTGATCCWGGGCTTGATCAG

>GAHG01000034 Hoplocephalus bungaroides SVMP-Hop-23 mRNA sequence  
ATGGCATCTGAAATGGCCCATGAGTTGGGTCTAATCTGGGCATTAGTCATGACAACGCTTCCTGTAATT  
GCAATCTGAGACCATGACATTATGCTCGCATAGATAAGATTTTGAACCTCTCTCTGAGTTGAGTCTTGTAG  
TATCCAGGAACATCAGAGGTATCTTCTTAGAGACAGACCACAATGCATTCTCAACAAACCTTGAGCACA  
GATATTGTTACACCTCCAGTTTGTGGAAATTACTTAGTGGAGGTGGGAGAAGAATGTGACTGTGGTTCTC  
CTGTGGATTGTCAAAGTCCCTGCTGCAATGCTACAACCTGTAACTGCAACATGAGGCACAGTGTGACTC  
CGGAGAGTGTGTGAGCAATGCAAAATTTAAGAAAGCAGGAGCAGAATGCCGGGCAGCAAAAGGATGACTGT  
GACTTGCCTGAAAGCTGCATGGCCTGCTGAGTGTCCACAGACAGCTTCCAGAGGAATGGACATC  
CATGCCAAAACAACAGGGTTACTGCTACAATGGGAAATGCCCATCATGACAAACCAATGTATTGATCT  
CTGGGGGCCAGGTGTAAATGTGTCTCCAGATGAATGTTTTACGTGGAACAGAAATGGCCAAAGTTGTGGC  
TTCTGCAGAATGGAAAATGGTGCAAAGATTCCATGTGCAGCAAAGGATGTAAAGTGTGGCAAKTTACACT  
GCGAAAAGGACACATGATATGCATCTGCTTTGTTTACCAGATGACCCAGATTATGGAATGGCTGAACC  
TGG

>GAHG01000035 Hoplocephalus bungaroides SVMP-Hop-30 mRNA sequence  
ATGTCTAAGACAGTAAGTCATGAACCTGCCTATGAGTTCAGCAATTGTAGTGTCCAGGAACATCAGAGGT  
ATCTTCTTAGTAACAGACCACAATGCATTCTCAACAAACCTTGAGCACAGATATTGTTACACCTCCAGT  
TTGTGGAAATTACTTAGTGGAGGTGGGAGAAGAATGTGATTGTGGCTCTCCTCAGGATTGTCAAGATGCC  
TGCTGCAATGCGGCAACTTGTAACTGCAACACGACTGTGACTCCGGAGAGTGTGTGAGCAATGCAAAAT  
TTAAGAAAGCAGGAGCAGAATGCCGGGCAGCAAAGGATGACTGTGACTTGCCCTGAAAGCTGCACTGGCCA  
ATCTGCTAAGTGTCCCAAGCAACCGCTTCCAGAGGAATGGACATCCATGCCAAAACAACAGGGTTACTGC  
TACAATGGGAAATGCCCATCATGACAAAACAGTGTATTGCTCTCAGGGGACCAGGTGTAATGTGTCTC  
CAGATGGATGTTTTAAGTTCAACAGGCTGGCCAAAGTTGTGGCTTCTGCAGAATAGAAAATGGTAGAAA  
GATTCCATGTGCAGCAAAGGATGTAAAGTGTGCACGTTATACTGCAAAGAGGGAACGCGACATGCCGC  
TGCTTTCTACAACACATGACCCATATTATAGAATGGTTGAACCTGGAACAAAATGTGGAGATGGAAGG  
TGTGCATCAACAGGCAGTGTGTTGATGTGCAGACAGCCTACTGA

>GAHG01000036 Hoplocephalus bungaroides SVMP-Hop-36 mRNA sequence  
ATGCACCTCTGTAGCAGTTATTTCAGAAATATAGCAGAGACACAAGAAATATGGCATCTATAATGGCCCCATG  
AGTTGGGTCTATAATCTGGGCATTAATCATGACAACTCTTCCTGTAATTGCAGTGCTAGACCATGCATTAT  
GTCTAAGACAGTAAGTGATGAACCTGCCTATGAGTTTCAGCAATTGTAGTGTCCAGGAACATCAGAGGTAT  
CTTCTTAGTAACAGACACAAGTGCAATCTCAACAAACCCCTTGAGCACAGATATTGTTACACCTCCAGTTT  
GTGGAAATTACTTAGTGGAGAGGGGAGAAGAAATGTGATTGTGGCTCTCCTCAGGATTGTCAAGATGCCTG  
CTGCAATGCTACAACCTGTAACTGCAACACGACTGTGACTCCGGAGAGTGTGTGAGCAATGCAAAATTT  
AAGAAAGCAGGAGCAGAATGCCGGGCAGCAAAAGGATGACTGTGACTTGCCTGAAAGCTGCACCTGGCCAAT  
CTGCTGAGTGTCCACGGACAGCTTCCAGAGGAATGGACATCCATGCCAAAACAACAGGGTTACTGTTA  
CAATCGGACATGCCCCCTCATGACAAACAGTGTATTGCTCTCGGGGGACCAGGTGTAATGTGTCTCCA  
GATGAATGTTTTATGATTTCAACAAAGAGGGCAAAAGGTTGTGGCTTCTGCAGAAATGAGAAATGGTAGAAAGA  
TTCCATGTGCAGCAAAAGGATGTAAGTGTGGCAAGTTATACTGCAAGAGGGGAAACAATAAATGCCTCTG  
CTATGAATCACAAGATGACCCAGATACTGGAATGGTTGAACCTGGAACAAAATGTGGAGATGGAAAGGTG  
TGCATCAACAGGCAGTGTGTTGATGTGCAGACAGCCTACTGA

>GAHG01000037 Hoplocephalus bungaroides SVMP-Hop-39 mRNA sequence  
ATGCATTATGTCTGCGACATAAGTCAAGCACTCTCTATGACTTCAGCAATTGTAGTGTCCAGGAACATC  
AGAGGTATCTTCTTAGAGTCAGACCACAATGCATTCTCAACAAACCCCTTGAGCACAGATATTGTTACACC  
TCCAGTTTGTGGAAATTACTTAGTGGAGGTGGGAGAAGAATGTGACTGTGGCTCTCCTCAGGATTGTCAA  
GATGCAATGTTTATGATTTCAACAAAGAGGGCAAAAGGTTGTGGCTTCTGCAGAAATGAGAAATGGTAGAAAGA  
GCAAAATTTAAGAAAGCAGGAGCAGAATGCCGGGCAGCAAAAGGATGACTGTGACTTGCCTGAAAGCTGCAC  
TGGCCAATCTGCTGAGTGTCCACGGACAGCTTCCAGAGGAATGGACATCCATGCCAAAACAACAGGGT  
TACTGCTACAATGGGAAATGCCCATCATGACAAACCAATGTATTGATCTCTGGGGGCCAGGTATAAATG  
TGTCTCCAGATGAATGTTTTACGTGGAAACAGAATGGCCAAGGTTGTGGCTTCTGCAGAAATGGAACATGG  
TAGAAAGATTCCATGTGTCAGCAAAAGGATATAAAGTGTGGCAAGTTACTGCAAAAAGGGAAACGCGACA  
TGCATCTGCTTTGTTTCCACAGATGACCCAGATTATGGAATGGCTGAACCTGGAACAAAATGTGGAGATG  
GAATGTGTGCATCAACAGGCAGTGTGTTGATGTGCAGACAGCCTACTGA

>GAHG01000038 Hoplocephalus bungaroides SVMP-Hop-45 mRNA sequence  
ATGGCCCCCATGAGTTGGGTCTAATCTGGGCATTTCATCATGACAACGCTTCCTGTAAATTGCAGTGTCTG  
GACAATGCATTATGTCTGAGACAATAAGTGATGAACCTTCTATGAGTTTCAGCAATTGTAGTGTCCAGGA  
ACATCAGAGGTATCTTCTTAGTAACAGACCAACAATGCATTCTCAACAAACCCATGAGAAAGAAATATTGTT  
ACACCTCCAGTTTGTGGAAATTACTTAGTGGAGCGGGGAGAAGAATGTGACTGTGGCTCTCCTCAGGATT  
GTCAAGTGCCTGCTGCAATGCTACAACCTGTAAACTGCAACACGAGGCACAGTGTGACTCCGGAGAGTG  
TTGTGAGAAATGCAAAATTTAAGAAAGCAGGAACAGAATGCCGGGCAGCAAAAGGATGACTGTGACTTGCCT  
GAAAGCTGCACCTGGCCAATCTGCTAAGTGTCCACGAAACCGCTTCCAGAGGAATGGACATCCATGCCAAA  
ACAATGAGGGTTACTGCTACAATGGGAAATGCCCATCATGACAAACCAAGTGTATTGCTCTCGGGGGACC  
AGGTGTAATGTGTCTCCAGATGGATGTTTTAAGTTCAACAGGCTGGCCAAAGATTGGGCTTCTGCAGA  
ATGGAAATGTAGAAATGATTCCGTGTGCAGCAACGATGAAAGTGTGGCAAGTTATACTGCATAGTCG  
GAAACAATACATGCCTCTGCTATGGTTACAGAGATGACCCAGATACTGGAATGGTTGAACCTGGAACAAA  
ATGTGGAGATGGAAAGGTGTGCATCAACAGGCAGTGTGTTGATGTGCAGACAGCCTACTGA

>GAHG01000039 Hoplocephalus bungaroides SVMP-Hop-46 mRNA sequence  
ATGCCCCCTGATGGCAGAGAAATTACAAACAGCCCTCCGGTTTCAGGATCAC'TGCTATTATCATGGCTACA  
TTCAGAAATGAAGCTGATTACGTGCAGTCATCAGTGCATGCAACGGCTTGAAGGACATTTCAAGCATCG  
AGGGGAGACATACTTTATTGAGCCCTTGAAGCTTCCGACAGTGAATCCCATGCAATCTACAAAGATGAA  
AATGTAGAAAAAGAGGATGAGATCCCCAAATCTGTGGGTAAACCTACTACTTCCGAGTCAGATGAGC  
CCATCGAAAGATCTCTCAATTAGCTAATACCTCTGAACAAGGCAGGTAAGTTCAGAGTCAAAAAATATAT  
TGAGTTTTACGTGGTTTTTGGACAACAAAAATGTACAAGAATTACAACAGCAACAGAGGTGCTATAAAAAACA  
AGAGTATATGAAATGATCAACACTTTAAATATGATGATGTACAGATCTTTGAATTTTTTCAATGCACTGATTG  
GCCTAGAAATTTGGACCAACAAAGATTAAGATTAAGATTGAACAAGAGGCGAATGTCACTTTGAAATCATT  
TGGAGAATGGAGAGAAACAGTTTTGCTGCCACGCAAAAGGAATGATAATGCTCAGTTACTTTACGGGCATT  
GACTTCAACGGAGAAACTGTAGGACTTGGCTTACGTGGGCACCTCTGCAGTCCGAAGTTCTCTGTAGCGG  
TTATTAGAAATATAGCAGAGACACAAGAATGATGGCATCTATAATGGCCCATGAGTTGGGTCTAATCT  
GGGCATTATCATGACAACCTCTCTGTAAATTGCAGTGCTAGACCATGCATTATGTCTGAAAGATTAAGT  
GTGGAAATCTGCTATGAGTTCAGCAATTTGATGTCCAGGAACATCGGAAGTATCTTCTTAGAGACAGAC  
CACAATGCATTCTCAACAAACCCCTTGAGCACAGATATTGTTACACCTCCAGCTTGTGGAAATTACTTAGT  
GGAGAGGGGAGAAGATGTGATTGTGGCTCTCCTCAGGATTGTCAAGATGCCTGCTGCAACGCTGCAACT  
TGTAAACTGCAACAGCATGTGACTCCGGAGAGTGTGTGAGAAATGCAAAATTTAAGAAAGCAGGAGCAG  
AATGCCGGGCAGCAAAAGGATGACTGTGACTTGCCTGAAAGCTGCAC'TGGCCAATCTGCTAAGTGTCCAC  
GAACCGCTTCCAGAGGAATGGACATCCATGCCAAAACAACAGGGTTACTGCTACAATGGGAAATGCCCC  
ATCATGCAAAACCAAGTATTGCTCTCAGGGGACAGGTGTAATGTGTCTCCAGATGGATGTTTTAAGT  
TCAACAGGCTGGCCAAAGTTGTGGCTTCTGCAGAAATGAGAAATGGTAGAAAGATTCCATGTGCAGCAAA  
GGATGTAAAGTGTGGCACGTTTATACTGCAAA

>GAHG01000040 Hoplocephalus bungaroides SVMP-Hop-50 mRNA sequence  
ATGCACCTCTGTAGCAGTTATTTCAGAAATATAGCAGAGACACAAGAAATATGGCATCTATAATGGCCCCATG  
AGTTGGGTCTATAATCTGGGCATTAATCATGACAACTCTTCCTGTAATTGCAGTGCTAGACCATGCATTAT  
GTCTAAGACAGTAAGTGATGAACCTGCCTATGAGTTTCAGCAATTGTAGTGTCCAGGAACATCAGAGGTAT  
CTTCTTAGTAACAGACACAATGCATTCTCAACAAACCCCTTGAGCACAGATATTGTTACACCTCCAGTTT  
GTGGAAATTACTTAGTGGAGAGGGGAGAAGAAATGTGATTGTGGCTCTCCTCAGGATTGTCAAGATGCCTG  
CTGCAACGCTACAACCTGTAACTGCAACACGACTGTGACTCCGGAGAGTGTGTGAGCAATGCAAAATTT  
AAGAAAGCAGGAGCACAATGCCGGGCAGCAAAAGGATGACTGTGACTTGCCTGAAAGCTGCACCTGGCCAAT  
CTGCAGAGTGTCCCCACGGACAGCCTTCCAGAGGAATGGACATCCATGCCAAAACAACAGGGTTACTTGCTA  
CAATCGGAAATGCCCCATCATGACAACACAGTGTATTGCTCTAGGGGGGCCAGGTGTAATGTGTCCCA  
GATGAGTGTTTTAAGTTCAACAGGATGGCCAAAGATTGTGGCTTCTGCAGAAATGAGAAATGGTAGAATGA  
TTCCGTGTGCAGCAAAAGGATGTAAGTGTGGCAAGATATTCTGCAAAAGAGGGGAAACGATACATGCTATCTG  
CTATGGTTTACCAGGTGACCCAGATAGAGGAATGGTTGAACCTGGAACAAAATGTGGAGATGGAAAGGTG  
TGCATCAACAGGCAGTGTGTTGATGTGCAGACAGCCTACTGA

>GAHG01000041 Hoplocephalus bungaroides SVMP-Hop-62 mRNA sequence  
ATGATGGCATCTATAATGGCCCATGAGTTGGTCTATAATCTGGGCATTAAACATGACAACCTCTCCTGTA  
ATTGCAGTGCTAGACCATGCATTATGTCTGAAAGATTAAAGTCATGAACCTGCCTATGAGTTTCAGCAATTG  
TAGTGTCCAGGAACATCGGGAGTATCTTCTTAGAGACAGACCACAATGCATTCTCAACAAACCCCTTGAGC  
ACAGATATTGTTACACCTCCAGTTTGTGGAAATTACTTAGTGGAGAGGGGAGAAGAATGTGATTGTGGCT  
CTCCTCAGGATTGTCAAGATGCCTGTGCAACGCTGCAACTTGTAAACTGCAACACGACTGTGACTCCGG  
AGAGTGTGTGAGAAATGCAAAATTAAGAAAGCAGGAGCAGAATGCCGGGCAGCAAAAGGATGACTGTGAC  
TTGCTTGAAGCTGCACCTGGCCAATCTGCTGAGTGTCCCACGGACAGCTTCCAGAGGAATGGACATCCAT  
GCCAAAACAACAGGGTTACTGCTACAATCGGAAATGCCCATCATGACAAACCAAGTGTATTGCTCTAGG  
GGGGCCAGGTGTAATGTGTCCCAAGATGGATGTTTTAAGTTCAACAGGATGGCCAGATTTGTGGCTTC  
TGCAGAAATGAAAAATGGTAGAATGATTCCGTGTGCAGCAAAAGGATGTAAGTGTGGCAAGATATTCTGCA

AAGAGGGAAACGATACATGCAACTGCTATGGTTTACCAGATGACCCAGATTATGGAATGGTTGAACCTGG  
AACAAAATGTGGAGATGGAAAGGTGTGCATCAACAGGCAGTGTGTTGATGTGCAGACAGCGTACTGA

>GAHG01000042 Hoplocephalus bungaroides SVMP-Hop-63 mRNA sequence  
ATGGCATCTATAATGGCCCATGAGTTGGGTCTAATCTGGGCATTAATCATGACAACTCTTCTGTAAAT  
GCAGTGTAGACCATGCATTATGTCTAAGACAGTAAGTGATGAACCTGCCTATGAGTTCAGCAATTGTAG  
TGTCAGGAACATCAGAGGTATCTTCTTAGTAACAGACCACAATGCATTCTCAACAAACCTTGAGCACA  
GATATTGTTACACCTCCAGTTTGTGGAAATTACTTAGTGGAGAGGGGAGAAGAATGTGATTGTGGCTCTC  
CTCAAGATTGTCAAGATGCCTGCTGCACGCTACAACCTTGTAACCTGCAACACGACTGTGACTCCGGAGA  
GTGTTGTGAGCAATGCAAAATTAAGAAAGCAGGAGCAGAATGCCGGGCAGCAAAGGATGACTGTGACTTG  
CCTGAAAGCTGCACCTGGCCAATCTGCTGAGTGTCCACCGGACAGCTTCCAGAGGAATGGACATCCATGCC  
AAAACAAACAGGGTTACTGCTACAATCGGAAATGCCCATCATGACAAACAGTGTATGCTCTAGGGGG  
GCCAGGTGTAAATGTGTCCCGATGGATGTTTTAAGTTCACCCAGGATGGCCAAGATTGTGGCTTCTGC  
AGAATGAAAAATGGTGAATGATTCCTGTGTGCAGCAAAGGATGTAAGTGTGGCAAGATATTCTGCAAAG  
AGGGAAACGATACATGCATCTGCTATGGTTACCAGGTGACCCAGATAGAGGAATGGTTGAACCTGGAAC  
AAAATGTGGAAATGGAAGGTGTGCATCAACAGGCAGTGTGTTGATGTGCAGACAGCCTACTGA

>GAHG01000043 Hoplocephalus bungaroides SVMP-Hop-65 mRNA sequence  
ATGTACAGGAATTACAACAGCAGCAACATGCTATAAAAAGAAAAGTATATGAAATAGTCAACCATTAA  
ACATGATGTACAGACCTTTGAATTTTCTCATTTGCACCTGATTGGCTAGAAAATTGGTCCAACCGAGATAA  
GATTAACATTGAACAGAGATGGCTGTCACTTTGAAATCATTGGAAGAACGGAGAGAAACAGTTTTACTG  
CCACGCAAAAGGAATGATAATGCTCAGTTACTTACGGGCATTGAGTTCAGCGGAACCTACTGTAGGACTTG  
GTTACGTGGGCACCTCTGTCAGTCCGGAGGAATCTGTAGCAGTTATTGAGGTTTATAGCAGAAGAACAG  
TATAATGGCATCTGAATGGCCCATGAGTTGGGTCTAATCTGGGCATTAGTCATGACAAACGCTTCTCTGT  
AATTGCAATGCTGGACCATGCATTATGTCTGCGATAATAAGTTTGAACCTCTCTGTAGTTCAGCTCTT  
TAGTATCCAGGAACATCAGAGGATCTTCTTAGAGACAGACCAATGTCATTCTCAACAAACCTTGAG  
CACAGATATTGTTACACCTCCAGTTTGTGGAATTACTTAGTGGAGGTGGGAGAAGAATGTGACTGTGGT  
TCTCTGAGGATTGTCAAAGTGCCTGCTGCAATGCTACAACCTGTAACTGCAACATGAGGCACAGTGTG  
ACTCCGAGAGTGTGTTGTGAGCAATGCAAA

>GAHG01000044 Hoplocephalus bungaroides VEGF-Hop-4 mRNA sequence  
ATGGTCATAGCGTAATGTCCATGTTGTGCTACACTCTGATTATTGCATTTCTGATTGGCATATGGGCAG  
CACCAAAATCTGAAGATAATGTCCCTCTGGGCTCCCTGCAACATCTGACCTTCTGACACCAGCTGTGC  
TCAAACCTCATGAGGGTCTGAAACATCTCGAAATACAGATCAGCACCATCCTGCTCCTAAGAAGGCAGAG  
GATCAAGAACTTGGATCAGCAGCCAAATCATTTGTGGATCCCAAGCTTTTTCAGAAGAGGCGTTTCCAGT  
CACCTCGTGTCTGTTTCACTCTCAGCCCCACCGTTGTCAAGAGATGAGCAAAGTGTGGAGTTCCTGGA  
CAATGAAGACGCTCTTAACAGGAATATCCGGGCCAAACGTGAAAATCATCTGTGCATAACAGAGGGGAA  
CATTTAGTGTGTGACAGTATGATGTTCTGGGTACCAACAAACCAAGCAACGGACATCAAGGGCAATA  
TGGTGAATGATGATGGTGGATGTAATCTTAATAATGAAGTCTACAAGCAGTACTTTTTTGAACCAAGTG  
CAGAAATCCAAATCCAGTACCGAGTGGGTGCAGGGGCAGTATTCCAGGCATTGGAATTCTTATTGCACC  
ACAACACAGACATTTGTTCAGGGCATTAACCATGGAAGGCAATCGGGCATCTTGGCGCTTCATTCCGATTG  
ACACTGCCTGTGTGTGCGTAATCATTAGAAAACTGACAACTTCTGA

>GAHG01000045 Hoplocephalus bungaroides VEGF-Hop-5 mRNA sequence  
ATGATGCATAGCGTAATGTCCATGTTGTGCTACACTCTGATTATTGCATTTCTGATTGGCATATGGGCAG  
CACCAAAATCTGAGGATAATGTCCCTCTGGGCTCCCTGCAACATCTGACCTTCTGACACCAGCTGTGC  
TCAAAATTCAGAGGGTCTGAAAACATCTCGAAATACAGATCAGCGCCATCTGCTCCTTAAGAAGGCAGAG  
GATCAAGAACTTGGATCAGCAGCCAAATCATTTGTGGATCCCAAGCTTTTTCAGAAGAGGCGTTTCCAGT  
CACCCCGTGTCTGTTTCACTCAGCCCCACCGTTGTCAAGAGATGAGCAAAGTGTGGAGTTCCTCGA  
CAATGAAGACGCTCTTAACAGGAATATCCGGGCCAAACGTGAAAATCATCTGTGCATAACCAAGGGGAA  
CATTCTGTGTGTGACAGTGTCACTGAGTGGGTATCAAAACCAAGCAACGGACATCCACGGCAATATGG  
TGACTGTGATGGAGGACATAACTCTTAATAATGAGGTCTACAAGCAGTACTTTTTTGAACCAAGTGCAG  
AAATCCAAATCCAAATCCACTACAGAGTGTGAGTGCAGGGGCATTGATTCCGGGCTTTGGAATTCTTATTGC  
ACCAGAACACAGACATTTGTCAAGGCATTAAACCATGTTAGGCAATCAGGCATCTTGGCGCTTCATTTCGTA  
TTGACACTGCCTGTGTGTGCGTAATCATTAGAAAACTGACAACTTCTGA

>GAHG01000046 Hoplocephalus bungaroides VEGF-Hop-6 mRNA sequence  
ATGATGCATAGTGAATGTCCATGTTGTGCTACACTCTGATTATTGCATTTCTGATTGGCATATGGGCAG  
CACCAAAATCTGAGGATAATGTCCCTCTGGGCTCCCTGCAACATCTGACCTTCTGACACCAGCTGTGC  
TCAAACCTCATGAGGGTCTGAAAACATCTCGAAATACAGATCAGCGCCATCTGCTCCTAAGAAGGCAGAG  
GATCAAGAACTTGGATCAGTAGCAACATCATTTGTGGATCCCAAGCTTTTTCAGAAGAGGCGTTTCCAGT  
CACCTCGTGTCTTTTTCAGCACTCAGCCCCACCGTTGTCAAGAGATGAGCAAAGTGTGGAGTTCCTCGA  
CAATGAAGACGCTCTTAACAGGAATATCCGGGCCAAACGTGAAAATCATCTGTGCATAACCAAGGGGAA  
CATTCTGTGTGTGACAGTGTCACTGAGTGGGTATCAAAACCAAGCAACGGACATCCACGGCAATATGG  
TGAATGTGATGGAGGACATAAATCTTAATAATGAGGTCTACAAGCAGTACTTTTTTGAACCAAGTGCAG  
AAATCCAAATCCAAATCCACTACAGAGTGTGAGTGCAGGGGCATTGATTCCGGGCTTTGGAATTCTTATTGC  
ACCAGAACACAGACATTTGTCAAGGCATTAAACCATGTTAGGCAATCAGGCATCTTGGCGCTTCATTTCGTA  
TTGACACTGCCTGTGTGTGCGTAATCATTAGAAAACTGACAACTTCTGA

>GAHH00000000.1|GAHH01000000 TSA: *Pseudonaja modesta*, transcriptome shotgun assembly, transcriptome shotgun assembly

>GAHH01000001 *Pseudonaja modesta* 3FTx-Pse-229 mRNA sequence  
ATGAAAACCTCTACTGCTGACCTTGGTGATGGTGACAATCGTGTGCCTGGACTTAGGATACACCCCTAACAT  
GTTACAAATCTCTGAGTGGTACTGTGTTTGTAAACCAACAGAGACGAAATGCTATCGATATTCTCTTCC  
TGCAACTCATGGTAATGCGGTAACCATCAAGGGATGTGGTACTTCTTGCCCTAGTGGAAATCCGCCCTGTG  
TGTTGCAGTACGGACCTATGCAACAAGTAG

>GAHH01000002 *Pseudonaja modesta* 3FTx-Pse-243 mRNA sequence  
ATGAAAACCTCTACTGCTGACCTTGGTGATGGTGACAATCATGTGCCTGGACTTAGGATACACCCCTAACAT  
GTTACAAATCTCTGAGTGGTACTGTGTTTGTAAACCAACAGAGACGAAATGCTATCGATATTCTCTTCC  
TGCAACTCATGGTAATGCGGTAACCATCAAGGGATGTGGTACTTCTTGCCCTAGTGGAAATCCGCCCTGTG  
TGTTGCAGTACGGACCTATGCAACAAGTAG

>GAHH01000003 *Pseudonaja modesta* 3FTx-Pse-242 mRNA sequence  
ATGAAAACCTCTACTGCTGACCTTGGTGATGGTGACAATCATGTGCCTGGACTTAGGATACACCCCTAACAT  
GTTACAAATCTCTGAGTGGTACTGTGTTTGTAAACCAACAGAGACGAAATGCTATCGATATTCTCTTCC  
TGCAACTCATGGTAATGCGGTAACCATCAAGGGATGTGGTACTTCTTGCCCTACTGGAATCCGCCCTGTG  
TGTTGCAGTACGGACCTATGCAACAAGTAG

>GAHH01000004 Pseudonaja modesta 3FTx-Pse-241 mRNA sequence  
ATGAAAACCTCTACTGCTGACCTTAGTGATGGTGACAATCATGTGCCTGGACTTAGGATACACCCTAACAT  
GTTACAAATCTCTGAGTGGTACTGTGGTTTGTAAACCACACGAGACGAAATGCTTTCGATATTCTGTTCC  
TGCAAGTCATGGTAATGCAATGATCATCAAGGGATGTGGTACTTCTTGCCCTAGTGAATCCGCCCTGTG  
TGTTGCAGTACGGACCTATGCAACAAGTAG

>GAHH01000005 Pseudonaja modesta 3FTx-Pse-245 mRNA sequence  
ATGAAAACCTCTACTGCTGACCTTGGTGATGGTGACAATCATGTGCCTGGACTTAGGATACACCCTAACAT  
GTTACAAATCTCTGAGTGGTACTGTGGTTTGTAAACCACACGAGACGAAATGCTTTCGATATTCTGTTCC  
TGCAAGTCATGGTAATGCAATGATCATCAAGGGATGTGGTACTTCTTGCCCTAGTGAATCCGCCCTGTG  
TGTTGCAGTACGGACCTATGCAACAAGTAG

>GAHH01000006 Pseudonaja modesta 3FTx-Pse-215 mRNA sequence  
ATGAAAACCTCTACTGCTGACCTTGGTGATGGTGACAATCATGTGCCTGGACTTAGGATACACCCTAACAT  
GTTACAAGTTTCTGAGGGGTACTGTGGTTTGTAAACCACACGAGACGAAATGCTATCGATATTCTGTTCC  
TGCAACTCATGGTAATGCGGTAACTTCAGGGGATGTGGTACTTCTTGCCATAGTGAATCCACCCTGTG  
TGTTGCAGTACGGACCTATGCAACAAGTAG

>GAHH01000007 Pseudonaja modesta 3FTx-Pse-178 mRNA sequence  
ATGAAAACCTCTACTGCTGACCTTGGTGATGGTGACAATCATGTGCCTGGACTTAGGATACACCCTAACAT  
GTTACAAGAGTTTTTCTTATACTGTGGTTTGTAAACCACACGAGACGAAATGCTATCGATATTCTCTTCC  
TGCAAGTCATGGTAATGCGGTAACTCTGGGGATGTGGTACTTCTTGCCCTACTGGAATCCGCCCTGTG  
TGTTGCAGTACGGACCTATGCAACAAGTACTCTACAAGTGGCTAA

>GAHH01000008 Pseudonaja modesta 3FTx-Pse-188 mRNA sequence  
ATGAAAACCTCTACTGCTGACCTTGGTGATGGTGACAATCATGTGCCTGGACTTAGGATACACCCTAACAT  
GTTACAAGAGTTTTTCTTATACTGTGGTTTGTAAACCACACGAGACGAAATGCTATCGATATTCTCTTCC  
TGCAAGTCATGGTAATGCGGTAACTCATGGGATGTGGTACTTCTTGCCCTAGTGAATCCGCCCTGTG  
TGTTGCAGTACGGACCTATGCAACAAGTAG

>GAHH01000009 Pseudonaja modesta 3FTx-Pse-211 mRNA sequence  
ATGAAAACCTCTACTGCTGACCTTGGTGATGGTGACAATCATGTGCCTGGACTTAGGATACACCCTAAAAT  
GTTACAAGAGTTATCGTGATACTGTGGTTTGTCAACCACACGAGACGAAATGCTATCGATATTCTGTTCC  
TGCAACTCATGGTAATGCGGTAACTCAGGGGATGTGGTACTTCTTGCCATAGTGAATCCACCCTGTG  
TGTTGCAGTACGGACCTATGCAACAATTAG

>GAHH01000010 Pseudonaja modesta 3FTx-Pse-217 mRNA sequence  
ATGAAAACCTCTACTGCTGACCTTGGTGATGGTGACAATCATGTGCCTGGACTTAGGATACACCCTAAAAT  
GTTACGAGAGTTTTTTCATACTGTGGTTTGTAAACCACAGGAGACGAAATGCTATCGATATTCTGTTCC  
TGCAAGTCATGGTAATGCGGTAACTCAGGGGATGTGGTACTTCTTGCCCTGGGGGAATCCACCCTGTG  
TGTTGCAGTACGGACCTGTGCAACCGGTAG

>GAHH01000011 Pseudonaja modesta 3FTx-Pse-271 mRNA sequence  
ATGAAAACCTCTGCTGCTGACCTTGGTGATGGTGACAAGCCTGTGCCTGGACTTAGGATACACCCTAAAAT  
GTTACGAGAGTTTTTTCATACTGTGGTTTGTAAACCACAGGAGACGAAATGCTATCGATATTCTGTTCC  
TGCAAGTCATGGTAATGCGGTAACTCAGGGGATGTGGTACTTCTTGCCCTGGGGGAATCCGCCCTGTG  
TGTTGCAGTACGGACCTGTGCAACCGGTAG

>GAHH01000012 Pseudonaja modesta 3FTx-Pse-256 mRNA sequence  
ATGAAAACCTCTACTGCTGACCTTGGTGATGGTGACAATCATGTGCCTGGACTTAGGATACACCCTAACAT  
GTTACGAGAGTTTTTTCATACTGTGGTTTGTAAACCACAGGAGACGAAATGCTATCGATATTCTGTTCC  
TGCAAGTCATGGTAATGCGGTAACTCAGGGGATGTGGTACTTCTTGCCCTGGGGGAATCCGCCCTGTG  
TGTTGCAGTACGGACCTGTGCAACCGGTAG

>GAHH01000013 Pseudonaja modesta 3FTx-Pse-267 mRNA sequence  
ATGAAAACCTCTACTGCTGACCTTAGTGATGGTGACAATCATGTGCCTGGACTTAGGATACACCCTAACAT  
GTTACGAGAGTTTTTTCATACTGTGGTTTGTAAACCACAGGAGACGAAATGCTATCGATATTCTGTTCC  
TGCAAGTCATGGTAATGCGGTAACTCAGGGGATGTGGTACTTCTTGCCCTGGGGGAATCCGCCCTGTG  
TGTTGCAGTACGGACCTGTGCAACCGGTAG

>GAHH01000014 Pseudonaja modesta 3FTx-Pse-268 mRNA sequence  
ATGAAAACCTCTACTGCTGACCTTGGTGATGGTGACAATCATGTGCCTGGACTTAGGATACACCCTAAAAT  
GTTACGAGAGTTTTTTCATACTGTGGTTTGTAAACCACAGGAGACGAAATGCTATCGATATTCTGTTCC  
TGCAAGTCATGGTAATGCGGTAACTCAGGGGATGTGGTACTTCTTGCCCTGGGGGAATCCGCCCTGTG  
TGTTGCAGTACGGACCTGTGCAACCGGTAG

>GAHH01000015 Pseudonaja modesta 3FTx-Pse-273 mRNA sequence  
ATGAAAACCTCTACTGCTGACCTTGGTGATGGTGACAATCATGTGCCTGGACTTAGGATACACCCTAACAT  
GTTACACGAGTTTTCATGGTACTGTGGTTTGTCAACCACACGAGACGAAATGCTATCGATATATTGCTCC  
TGGAACCTCATGGTCATGCGTTAACCATCAGGGGATGTGATACTTATTGCCCTGGGGGAATGCGCCCTGTG  
TGTTGCAGTACGGACCTGTGCAACTGGTAG

>GAHH01000016 Pseudonaja modesta 3FTx-Pse-179 mRNA sequence  
ATGAAAACCTCTACTGCTGACCTTGGTGATGGTGACAATCATGTGCCTGGACTTAGGATACACCCTAAAAT  
GTTACAAGGGTTATTATGATACTGTGGTTTGTAAACCAAACGAGACCATTTGCTATGAATATCATATTTC  
TGCAACTCATGGTAATTGATACTCTACAGGGGATGTAGTACTTCTTGCCCTGGGGGAATGCGCTCTGTG  
TGTTGCAGTACGGACCTGTGCAACAAGTAG

>GAHH01000017 Pseudonaja modesta 3FTx-Pse-180 mRNA sequence  
ATGAAAACCTCTACTGCTGACCTTGGTGATGGTGACAATCATGTGCCTGGACTTAGGATACACCCTAAAAT  
GTTACAAGGGTTATCATGATACTGTGGTTTGTAAACCACAGACGACCATTTGCTATGAATATCATATTTC  
TGCAACTCATGGTAATTGATACTCTACAGGGGATGTAGTACTTCTTGCCCTGGGGGAATGCGCTCTGTG  
TGTTGCAGTACGGACCTGTGCAACAAGTAG

>GAHH01000018 Pseudonaja modesta 3FTx-Pse-191 mRNA sequence  
ATGAAAACCTCTACTGCTGACCTTGGTGATGGTGACAATCATGTGCCTGGACTTAGGATACACCCTAAAAT  
GTTACAAGGGTTATCATGATACTGTGGTTTGTAAACCACACGAGACCATTTGCTATGAATATCGTATTTC  
TGCAACTCATGGTAATTGATACTCTACAGGGGATGTAGTACTTCTTGCCCTGGGGGAATGCGCTCTGTG  
TGTTGCAGTACGGACCTGTGCAACAAGTAG

>GAHH01000019 Pseudonaja modesta 3FTx-Pse-183 mRNA sequence

ATGAAAACTCTACTGCTGACCTTGGTGATGGTGACAATCATGTGCCTGGACTTAGGATACACCCTAACAT  
GTTACAAGGGTTATCATGGTACTGTGGTTTGTAAACCACACGAGACCATTGCTATCGATATCTTATTCC  
TGCATTTCATAGTAATGCGATACTCGCCAGAGGATGTAGTACTTCTTGCCCTGGGGGAATCCGCCCTGTG  
TGTTGCAGTACGGACCTGTGCAACAAGTAG

>GAHH01000020 Pseudonaja modesta 3FTx-Pse-196 mRNA sequence  
ATGAAAACTCTACTGCTGACCTTGGTGATGGTGACAATCATGTGCCTGGACTTAGGATACACCCTAACAT  
GTTACAAGGGTTATCATGGTACTGTGGTTTGTAAACCACACGAGACCATTGCTATCGATATCTTATTCC  
TGCATTTCATAGTAATGCGATACTCGCCAGAGGATGTAGTACTTCTTGCCCTGGGGGAATCCGCCCTGTG  
TGTTGCAGTACGGACCTGTGCAACAAGTAG

>GAHH01000021 Pseudonaja modesta 3FTx-Pse-200 mRNA sequence  
ATGAAAACTCTACTGCTGACCTTGGTGATGGTGACAATCATGTGCCTGGACTTAGGATACACCCTAAAAT  
GTTACAAGAGTTATCATGGTACTGTGGTTTGTAAACCACACGAGACCATTGCTATCGATATGTATTCC  
TACAAGTCATGGTAATGCGAACATTTACAAAGGATGTAGTGCTTCTTGCCCTGGGGGAATCCGGCTCTGTG  
TGTTGCAGTACGGACCTGTGCAACAAGTAG

>GAHH01000022 Pseudonaja modesta 3FTx-Pse-263 mRNA sequence  
ATGAAAACTCTACTGCTGACCTTGGTGATGGTGACAATCATGTGCCTGGACTTAGGATACACCCTAACAT  
GTTACAAGGATTTATCGTACTGTGGTTTGTAAATCACACGAGACCATTGCTATCGATATAATATTCC  
TACAAGTCATGGTAATGCGATAACCTACAGGGGATGTAGTGCTTCTTGCCCTGGGGGAATCCGCTCTGTG  
TGTTGCAGTACGGACCTGTGCAACAAGTAG

>GAHH01000023 Pseudonaja modesta 3FTx-Pse-275 mRNA sequence  
ATGAAAACTCTACTGCTGACCTTGGTGATGGTGACAATCATGTGCCTGGACTTAGGATACACCCTAACAT  
GTTACAAGGATTTATCGTACTGTGGTTTGTAAACCACACGAGACCATTGCTATGTATATACTCTTCC  
TGCAACTCATGGTAATGTGATAACCTCCATGGGATGTGGTACTTCTTGCCCTGGGGGAATCCGCCCTGTG  
TGTTGCAGTAAGGACCTGTGCAACAAGTAG

>GAHH01000024 Pseudonaja modesta 3FTx-Pse-272 mRNA sequence  
ATGAAAACTCTACTGCTGACCTTGGTGATGGTGACAATCATGTGCCTGGACTTAGGATACACCCTAACAT  
GTTACAAGGATTTATCGTACTGTGGTTTGTAAACCACACGAGACCATTGCTATGAATATACTCTTCC  
TGCAACTCATGGTAATGTGATGAACCTCCAGGGGATGTGGTACTTCTTGCCCTGGGGGAATCCGCCCTGTG  
TGTTGCAGTACGGACCTGTGCAACAAGTAG

>GAHH01000025 Pseudonaja modesta 3FTx-Pse-204 mRNA sequence  
ATGAAAACTTTGCTGCTGACCTTGGTGGTGGTGACAATCATGTGCCTGGACTTAGGATACACCCTAACAT  
GTTACAAGAGTTTCTGATACATCTGTGGTTTGTAAACCACACGAGACGAAATGCTTTCATATTTCTTTTG  
TCCATTTCGAAATCGTGTGATATACGTCAGGGGATGTAGTACTTCTTGCCCTGGGGGAACAAATGCTGTG  
TGTTGCAGTACGGACCTGTGCAACAAGTAG

>GAHH01000026 Pseudonaja modesta 3FTx-Pse-206 mRNA sequence  
ATGAAAACTTTGCTGCTGACCTTGGTGGTGGTGACAATCGTGTGCCTGGACTTTGGATACACCCTAACAT  
GTTACAAGAGTTTCTGATACATCTGTGGTTTGTAAACCACACGAGACGAAATGCTTTCATATTTCTTTTG  
TCCATTTCGAAATCGTGTGATATACGTCAGGGGATGTAGTACTTCTTGCCCTGGGGGAACAAATGCTGTG  
TGTTGCAGTACGGACCTGTGCAACAAGTAG

>GAHH01000027 Pseudonaja modesta 3FTx-Pse-207 mRNA sequence  
ATGAAAACTTTGCTGCTGACCTTGGTGGTGGTGACAATCGTGTGCCTGGACTTAGGATACACCCTAACAT  
GTTACAAGAGTTTCTGATACATCTGTGGTTTGTAAACCACACGAGACGAAATGCTTTCATATTTCTTTTG  
TCCATTTCGAAATCGTGTGATATACGTCAGGGGATGTAGTACTTCTTGCCCTGGGGGAACAAATGCTGTG  
TGTTGCAGTACGGACCTGTGCAACAAGTAG

>GAHH01000028 Pseudonaja modesta 3FTx-Pse-239 mRNA sequence  
ATGAAAACTTTGCTGCTGACCTTGGTGGTGGTGACAATCGTGTGCCTGGACTTAGGATACACCCTAACAT  
GTTACAAGTCTCTGAGTGGTACTGTGGTTTGTAAACCACACGAGACGAAATGCTATCGATATTTCTTTTG  
TCCATTTCCAATCGTGTGATATACAGAAGGGGATGTGGTACTTCTTGCCCTGGGGGAACAAATCCTGTG  
TGTTGCAGTACGGACCTGTGCAACAAGTAG

>GAHH01000029 Pseudonaja modesta 3FTx-Pse-240 mRNA sequence  
ATGAAAACTTTGCTGCTGACCTTGGTGGTGGTGACAATCGTGTGCCTGGACTTAGGATACACCCTAACAT  
GTTACAAGTCTCTGAGTGGTACTGTGGTTTGTAAACCACACGAGACAAAATGCTATCGATATTTCTTTTG  
TCCATTTCCAATCGTGTGATATACAGAAGGGGATGTGGTACTTCTTGCCCTGGGGGAACAAATCCTGTG  
TGTTGCAGTACAGACCTGTGCAACAAGTAG

>GAHH01000030 Pseudonaja modesta 3FTx-Pse-288 mRNA sequence  
ATGAAAACTTTGCTGCTGACCTTGGTGGTGGTGACAATCGTGTGCCTGGACTTAGGATACACCCTAACAT  
GTTACAAGTCTCCGTTTGGTACTGTGGCTTGCAACAAATATGAGACCTTCTGCTATCGATTTACTCATTTG  
TCCATTTCCACATCATGTGGTAGTCATCAGGGGATGTATTACTTCTTGCCCTACGCAAAACAAATTATGTG  
TGTTGCAGTACGGACCTGTGCAACAAGTAG

>GAHH01000031 Pseudonaja modesta 3FTx-Pse-290 mRNA sequence  
ATGAAAACTCTACTGCTGACCTTGGTGATGGTGACAATCATGTGCCTGGACTTAGGATACACCCTAACAT  
GTTACAAGTCTCCGTTTGGTACTGTGGCTTGCAACAAATATGAGACCTTCTGCTATCGATTTACTCATTTG  
TCCATTTCCACATCATGTGGTAGTCATCAGGGGATGTATTACTTCTTGCCCTACGCAAAACAAATTATGTG  
TGTTGCAGTACGGACCTGTGCAACAAGTAG

>GAHH01000032 Pseudonaja modesta 3FTx-Pse-287 mRNA sequence  
ATGAAAACTCTACTGCTGACCTTGGTGATGGTGACAATCATGTGCCTGGACTTAGGATACACCCTAACAT  
GTTACAAGTCTCCGTTTGGTACTGTGGCTTGCAACAAATATGAGACCTTCTGCTATCGATTTACTCATTTG  
TCCATTTCCACATCATGTGGTAGTCATCAGGGGATGTAGAGTTTCTTGCCCTACGCAAAACAAATTATGTG  
TGTTGCAGTACGGACCTGTGCAACAAGTAG

>GAHH01000033 Pseudonaja modesta 3FTx-Pse-197 mRNA sequence  
ATGAAAACTCTACTGCTGACCTTGGTGATGGTGACAATCATGTGCCTGGACTTAGGATACACCCTAACAT  
GTTACAAGTCTCCGTTTGGTACTGTGGCTTGCAACAAATATGAGACCTTCTGCTATCGATTTACTCATTTG  
TGCAGGTCATGGTAATGTGATAGACCTCTGGGGATGTGCTACTTCTTGCCCTTGGGAAAACCCCCCTGAA  
TGTTGCAGTACGGACCTGTGCAACCGGTAG

>GAHH01000034 Pseudonaja modesta 3FTx-Pse-23 mRNA sequence  
ATGAAAACTCTGCTGCTGACCTTGGTGGTGGTGACAATCGTGTGCCTGGACTTAGGTGACAGCTTGATAT

GCTACCTGGATTTTAGTGTACCTCACACTTGTGCACCTGGGGAGGAGCTATGCTATACAAGGACTTGGAA  
TGATGGCCGTGGAAACGCGAATCGAACGGGGATGTGCTGCTACTTGCCCTATTCCAAAGAACCCCGAGATA  
CATGTTACCTGTTGCTCAACAGACAGGTGCAACCCACATCCAAAAGAGAAACCTCGTTGA

>GAHH01000035 Pseudonaja modesta 3FTx-Pse-38 mRNA sequence  
ATGAAAACTCTGCTGCTGACCTTGGTGGTGGTGACAATCGTGTGCCTGGACTTAGGTGACAGCTTGATAT  
GCTACCTGGATTTTAGTGTACCTCACACTTGTGCACCTGGGGAGGAGCTATGCTATACAAGGACTTGGAA  
TGATGGCCGTGGAAACGCGAATCGAACGGGGATGTGCTGCTACTTGCCCTATTCCAAAGAGGCCCGGTATA  
CATGTTACCTGTTGCTCAACAGACAGGTGCAACCCACATCCAAAAGAGAAACCTCGTTGA

>GAHH01000036 Pseudonaja modesta 3FTx-Pse-15 mRNA sequence  
ATGAAAACTCTGCTGCTGACCTTGGTGGTGGTGACAATCGTGTGCCTGGACTTAGGTGACAGCTTGATAT  
GCTACCTGGATTTTAGTGTACCTCACACTTGTGCACCTGGGGAGGAGCTATGCTATACAAGACTTGGAG  
TGATGGCCGTGGAAACGCGAATCGAACGGGGATGTGCTGCTACTTGCCCTATTCCAAAGAGGCCCGGTATA  
CATGTTACCTGTTGCTCAACAGACAGGTGCAACCCACATCCGAAACAGAAACCTCATTGA

>GAHH01000037 Pseudonaja modesta 3FTx-Pse-24 mRNA sequence  
ATGAAAACTCTGCTGCTGACCTTGGTGGTGGTGACAATCGTGTGCCTGGACTTAGGTGACAGCTTGATAT  
GCTACCTGGATTTTAGTGTACCTCACACTTGTGCACCTGGGGAGGAGCTATGCTATACAAGACTTGGTA  
TGATGGCCGTGGAAACGCGAATCGAACGGGGATGTGCTGCTACTTGCCCTATTCCAAAGAGGCCCGGTATA  
CATGTTACCTGTTGCTCAACAGACAGGTGCAACCCACATCCGAAACAGAAACCTCATTGA

>GAHH01000038 Pseudonaja modesta 3FTx-Pse-39 mRNA sequence  
ATGAAAACTCTGCTGCTGACCTTGGTGGTGGTGACAATCGTGTGCCTGGACTTAGGTGACAGCTTGATAT  
GCTACCTGGATTTTAGTGTACCTCACACTTGTGCACCTGGGGAGGAGCTATGCTATACAGAGACTTGGTA  
TGATGGCCGTGGAAACGCGAATCGAACGGGGATGTGCTGCTACTTGCCCTATTCCAAAGAGGCCCGGTATA  
CATGTTACCTGTTGCTCAACAGACAGGTGCAACCCACATCCGAAACAGAAACCTCATTGA

>GAHH01000039 Pseudonaja modesta 3FTx-Pse-89 mRNA sequence  
ATGAAAACTCTGCTGCTGACCTTGGTGGTGGTGACAATCGTGTGCCTGGACTTAGGATACACCAGGACAT  
GCTACAAAACACCTGCACCTGTTAGACCTGGGCCTTGTCCACCTGGGCAGGAGATATGCTACACAAAGAC  
TGTGTGTGATGAGTGGTGTGGTCATCAGAGGAAAGGTAATCGAACTGGGATGTGCTGCTACTTGCCCTACT  
CCAGAGAAGACCAGTATACAAGTTACCTGTTGCTCAACAGACAGGTGCAACCCACATCCGAAACAGAAAC  
CTCATTGA

>GAHH01000040 Pseudonaja modesta 3FTx-Pse-110 mRNA sequence  
ATGAAAACTCTGCTGCTGACCTTGGTGGTGGTGACAATCATGTGCCTGGACTTAGGATACACCAGGACAT  
GCTTGACAAACACCTGGTTTTTTATCTAAGCCTTGTCATCTGGGCAGGAGGTATGCTACACAAAGGCATG  
GTGTAATGAGTGGTGTCCAGACAGAGGAAAGCAAGTCGAAATGGGATGTGCTGCTATTTGCCCTTCAGTG  
AAGCCCAAAGAGGATATTACCTGTTGCTCAGAAGACAATTGCAACCCACGTCCTATAA

>GAHH01000041 Pseudonaja modesta 3FTx-Pse-99 mRNA sequence  
ATGAAAACTCTGCTGCTGACCTTGGTGGTGGTGACAATCGTGTGCCTGGACTTAGGATACACCAGGACAT  
GCTTCAAAAACACCTGTGACCTGTAGATCTGAGCCTTGTCCACCTGGGGAGGACCTATGCTTTACAAGGAC  
TTGGAGAGATGCCCATAGTGGAAACAGAGGACCGCGAGTCGATTTGGGATGTGCTGCTACTTGCCCCACT  
ACAGATAAGACCGAGATACGTATTTCTGTTGCTCAGAAGACGATTGCAACACATTTCCAAAATGGGAAC  
GTCCTAAACCACGTCCTTGA

>GAHH01000042 Pseudonaja modesta 3FTx-Pse-116 mRNA sequence  
ATGAAAACTCTGCTGCTGACCTTGGTGGTGGTGACAATCGTGTGCCTGGACTTAGGATACACCAGGACAT  
GCTTCAAAAACACCTGCACCTGTTAGATCTGGGCCTTGTCCACCTGGGGAGGACCTATGCTTTACAAGGAC  
TTGGAGAGATGGCCATAGTGGAAACAGAGACCGCGAGTCGATTTGGGATGTGCTGCTACTTGCCCCACT  
ACAGATAAGACCGAGATACATATTTCTGTTGCTCAGAAGACGATTGCAACACATTTCCGCAATGGGAAC  
GTCCTAAACCACGTCCTCGAGGGAGGCTCTCATCCATCAAGGACCATGCTTGA

>GAHH01000043 Pseudonaja modesta 3FTx-Pse-121 mRNA sequence  
ATGAAAACTCTGCTGCTGACCTTGGTGGTGGTGACAATCGTGTGCCTGGACTTAGGATACACCAGGACAT  
GCTTCAAAAACACCTGCACCTGTTAGATCTGAGCCTTGTCCACCTGGGGAGGACCTATGCTTTACAAGGAC  
TTGGAGAGATGGCCATGGTGGAAAGAGGACCGCGAGTCGATTTGGGATGTGCTGCTACTTGCCCCACTACA  
GATAAGACCGGATACATATTTCTGTTGCTCAACAGACGATTGCAACACATTTCCGAAATGGGAACGTC  
CTAAATAA

>GAHH01000044 Pseudonaja modesta 3FTx-Pse-93 mRNA sequence  
ATGAAAACTCTGCTGCTGACCTTGGTGGTGGTGACAATCGTGTGCCTGGACTTAGGATACACCAGGACAT  
GCTTCAAAAACACCTGCACCTGTAGATCTGAGCCTTGTCCACCTGGGGAGGAGGTATGCTATACAAGGAC  
TTGGAGAGATGGCCATGGTGGAAAGAGGACCGCGAGTCGATTTGGGATGTGCTGCTACTTGCCCCACTACA  
GATAAAACCGGGATACATATTTCTGTTGCTCAACAGACGATTGCAACACATTTCCGAAATGGGAACGTC  
CTAAATAA

>GAHH01000045 Pseudonaja modesta 3FTx-Pse-105 mRNA sequence  
ATGAAAACTCTGCTGCTGACCTTGGTGGTGGTGACAATCGTGTGCCTGGACTTAGGATACACCAGGACAT  
GCTTCAAAAACACCTGATGTTAGATCTGAGCCTTGTCCACCTGGGGAGGACCTATGCTATACAAGAGTTG  
GTGTGTTGAGTTGTGTACAGCAGAGAAATCGATTCGATTTGGGATGTGCTGCTACTTGCCCTACTCCA  
GAGAAATACCGGTATAGAGATTATCTGTTGCTCAACAGACAATTGCAACCCATTTCCGAAATGGGAACATC  
CTAAACCACGTTCTCGAGGGAGGCTCTCATCCATCAAGGACCATCCTTGA

>GAHH01000046 Pseudonaja modesta 3FTx-Pse-78 mRNA sequence  
ATGAAAACTCTGCTGCTGACCTTGGTGGTGGTGACAATCATGTGCCTGGACTTAGGATACACCAGGACAT  
GCTTCAAAAACACCTTAGTTAATCTGAGCCTTGTCCACCTGGGCAGGAGGTATGCTACACAAAGACTTG  
GTGTGATTCTTTTGTTCCTCAGAGGAAAGGTAGTCGAACTGGGATGTGCTGCTACTTGCCCTCCAGCG  
GGGCCAAAAGAGGATGTTACCTGTTGCTCAACAGACAATTGCAACACACATCCGTAA

>GAHH01000047 Pseudonaja modesta CRiSP-Pse-4 mRNA sequence  
ATGATTGCCTTCATTGCTCTGTGAGTCTTGTGTCAGTGTGCAACAGTCTTCTGGAACTGTTGATTTTG  
CTTCTGAGTCAAGTAAAGTAAATCTGACCAAGGGAGATTGTTGACAAGCACAATGATTTAAGAAGATC  
AGTGAAACCAACTGCTAGGAACATGTTACAAATGAAATGGAATTCTCTTGCTGCTCAAAATGCAAAACGT  
TGGGCAATAGATGTAATGCTCAGAGTCCACCACACAGAAGTGTGGGAAAACCTCCGTTGTGGTG  
AAAATATATTCAATCAAGTCAACCTTTCCATGGAGTGAATAGTTCAGGCTTGGTATGATGAAGTCAA  
AAAATTGTCTATGGCATTGGACCAAAACCCACCAAATTTCTGTTACTGGCCATTATACCCAGGTAGTTTGG  
TACAAAAGTCACTTCTTGGTTGTGCTTCTGCCAAATGTTCTCCAACCAAATACCTCTACGTTTGTCAAT  
ACTGCCAGCAGGGAACATCGAAGGTTCAATTGCTACTCCATATAAATCAGGACCACCTTGTGGGGACTG

TCCTTCGGCTTGTGACAACGGACTATGCACAAATCCTTGCAAACATAACGATGACTTTTCGAACTGCAAA  
ACTTTAGTGCAACAACATATAATGCCAGAGTGAATGGATCAAGTCAAAATGCCCTGCTACTTGCCTCTGCC  
ACACTGAAATAATATAG

>GAHH01000048 Pseudonaja modesta CRiSP-Pse-11 mRNA sequence  
ATGATTGCCTTCATTGTCTTGCTGAGTCTTGCTGCAGTGTCTGCAACAGTCTTCTGGAAGTGTGATTTTG  
CTTCTGAGTCAAGTAACAAAATAATTACCAAAAGGAGATTGTTGACAAGCACAATGATTTAAGGAGATC  
AGTGAAACCAACTGCTAGGAAACATGTTACAAATGAAATGGAATTCTCTTGCTGCTAAAAATGCAAAACGT  
TGGGCAAAATAGATGTACTTTTCTCAGTCCACCATACACAAGAACTGTGGGAAAACCTCCGTGTGGTG  
AAAATATATTCATGTCAAGTCAACCTTTTGCATGGAGTGGAGTAGTTCAGGCTTGGTATGATGAAGTCAA  
AAAATTTGCTCTATGGCATTGGAGCAAAGCCACCAAGTTCTGTTACTGGCCATTATACCCAGGTAGTTTGG  
TACAAAAGTCACCTTCTTGGTTGTGCTTCTGCCAAATGTTCTCCAACCAAATACCTCTACGTTTGTCAAT  
ACTGCCCAGCAGGGAACATCAAAGGTTCAATTGCTACTCCATATAAATCAGGACCACCTTGTGGGGACTG  
TCCTTCGGCTTGTGACAACGGACTATGCACAAATCCTTGCAAACATAACGATGACTTTATCGAACTGCAAA  
ACTTTAGTGAAAAACATATAATGCCAGACTGAATGGATCAAGTCAAAATGCCCTGCTACTTGCCTCTGCC  
GCAC TGAAATAATATAG

>GAHH01000049 Pseudonaja modesta CRiSP-Pse-17 mRNA sequence  
ATGATTGCCTTCATTGTCTTGCTGAGTCTTGCTGCAGTGTCTGCAACAGTCTTCTGGAAGTGTGATTTTG  
CTTCTGAGTCAAGTAACGAAATGATTACCAAGGGAGATTGTTGACAAGCACAATGATTTAAGAAATC  
AGTGAAACCAACTGCTAGGAAACATGTTACAAATGAAATGGAATTCTCTTGCTGCTCAAAATGCAAAACGT  
TGGGCAAAATAGATGTACTTTATGCTCAGTCCACCACACACAAGAACTGTGGGAAAACCTCCGTGTGGTG  
AAAATATATTCATGTCAAGTCAACCTTTTCCATGGAGTGGAAATAGTTCAGGCTTGGTATGATGAAGTCAA  
AAAATTTGCTCTATGGCATTGGACCAAACCCACCAAGTTCTGTTACTGGCCATTATACCCAGGTAGTTTGG  
TACAAAAGTCACCTTCTTGGTTGTGCTTCTGCCAAATGTTCTCCAACCAAATACCTCTACGTTTGTCAAT  
ACTGCCCAGCAGGGAACATCGAAGGTTCAATTGCTACTCCATATAAATCAGGACCACCTTGTGGGGACTG  
TCCTTCGGCTTGTGACAACGGACTATGCACAAATCCTTGCAAACATAACGATGACTTTTCGAACTGCAAA  
ACTTTAGTGCAACAACATATAATGCCAGAGTGAATGGATCAAGTCAAAATGCCCTGCTACTTGCCTCTGCC  
ACACTGAAATAATATAG

>GAHH01000050 Pseudonaja modesta KP-Pse-5 mRNA sequence  
ATGTCTTCTGGAGGTCTTCTTCTCCTGCTGGGACTCCTCACCTCTGGGAGGTGCTGACCCCGTCTCCA  
GCAAGGACCGTCCAAATTTCTGTGAAGTGCCTGCTGAAACCGGACGATGTAATGCCCATATCACACGCTT  
CTACTACAACCCACGTCAACATCAATGCATAAAGTTTCTTTATGGTGGATGCGGAGGGAATGCTAACAAAT  
TTTAAGACCATTAAAGGAATGCAAAAGCACCTGTATTGCTGA

>GAHH01000051 Pseudonaja modesta KP-Pse-7 mRNA sequence  
ATGTCTTCTGGAGGTCTTCTTCTCCTGCTGGGACTCCTCACCTCTGGGAAGTGCTGACCCCGTCTCCA  
GCAAGGACCGTCCAAATTTCTGTGAAGTGCCTGCTGAAACCGGACTATGTAATGCCCATATAACACACGCTT  
CTACTACAACCCACGTCAACATCAATGCATAAAGTTTCTTTATGGTGGATGCGGAGGGAATGCTAACAAAT  
TTTAAGACCATTAGAGGAATGCAAAAGCACCTGTATTGCTGA

>GAHH01000052 Pseudonaja modesta LP-Pse-1 mRNA sequence  
ATGGGGCGATTCTCTTGGTGACCTCAGCTTGCTGGTCGGGGCTTTCTCCCTAAATGGAGCCAACAGCT  
GCTGTTGTCCCCAAGATTGGCTCCCCATGAATGGGTTTGTGTACAAGGTCTTCAATGATCCCCAAGAACTG  
GGACGACGCTGAGATGTTCTGTCAGGAAATTAAGCCAGGTTGCCACCTCGCATCCATCCATAGTAATGCA  
GATGCCAGTTGAGCTTTCTGAATACATCACCGACTATCTCATAGGTCATGACCACGTCTGGATCGGACTGC  
GGGATACAAACAAGAAAGTACATGTGGGAGTGGACAGACAGATCTAGAAGTGAATTCCTGCTCTGGAGGAA  
AGATCAGCCCCGATCATTCACATAAATGAGTTCTGTGTCGAGATTGTGAGCTTTACAGGGTATCGCGAG  
TGAATGACGACAGCTGCACAGCCTTGGCTCCTTTTCTGTGCCAGTGCAAACTAG

>GAHH01000053 Pseudonaja modesta LP-Pse-2 mRNA sequence  
ATGGGGCGATTCTCTTGGTGACCTCAGCTTGCTGGTCGGGGCTTTCTTCCCTAAATGAAGCCAACAGCT  
GCTGTTGCCCCAAGATTGGCTCCCCATGAATGGGTTTGTGTACAAGGTCTTCAATGACCACAAGAACTG  
GAACGATGCTGAGATGTTCTGTCAGGAAATTAAGCCAGGTTGCCACCTCGCTCCATCCATAGTAATGCA  
GATGCCAGTTGAGCTTTCTGAATACATCACCGACTATCTCATAGGTCATGACCACGTCTGGATCGGACTGC  
GGGATACAAACAAGAAAGTACATGTGGGAGTGGACAGACAGATCTAGAAGTGAATTCCTGCTCTGGAGGAA  
AGATCAGCCCCGATCATTCACATAAATGAGTTCTGTGTCGAGATTGTGAGCTTTACAGGGTATCGCGAG  
TGAATGACGACAGCTGCACAGCCTTGGCTCCTTTTCTGTGCCAGTGCAAACTAG

>GAHH01000054 Pseudonaja modesta LP-Pse-3 mRNA sequence  
ATGGGGCGATTCTCTTGGTGACCTCAGCTTGCTGGTCGGGGCTTTCTTCCCTAAATGGAGCCAACAGCT  
GCTGTTGTCCCCAAGATTGGCTCCCCATGAATGGGTTTGTGTACAAGGTCTTCAATGACCACAAGAACTG  
GGACGACGCTGAGATGTTCTGTCAGGAAATTAAGCCAGGTTGCCACCTCGCTCCATCCATAGTAATGCA  
GACTCAGCTGACTTGGCTGAATACGTCTCCGACTATCTCATAGGTCATGACCACGTCTGGATCGGACTGC  
GGGATACAAAGAAGAAAGTACATCTGGGAGTGGACAGACAGATCTAGAAGTGAATTCCTGCTCTGGAGGAA  
AGATCAGCCCCGATCATTTAAAAACAATGAGTTCTGTGTCGAGATTGTGAGCTTTACAGGGTATCGCGAG  
TGAATGACGACAGCTGCACAGCCTTGGCTCCTTTTCTGTGCCAGTGCAAACTAG

>GAHH01000055 Pseudonaja modesta LP-Pse-5 mRNA sequence  
ATGGGGCGATTCTCTTGGTGACCTCAGCTTGCTGGTCGGGGCTTTCTCCCTAAATKGAGCCAACAGCT  
GCTGTTGTCCCCAAGATTGGCTCCCCATGAATGGGTTTGTGTACAAGGTCTTCAATGACCACAAGAACTG  
GAACGATTCTGAGATGTTCTGTCAGGAAATTAAGCCAGGTTGCCACCTCGCATCCATCCATAGTAATGCA  
GATGCAGTTGAGCTTTCTGAATACATCACCGACTATCTCATAGGTCATGACCACGTCTGGATCGGACTGC  
GGGATACAAACAAGAAAGTACATGTGGGAGTGGACAGACAGATCTAGAAGTGAATTCCTGCTCTGGAGGAA  
AGATCAGCCCCGATCATTTCACTAACAAATGAGTTCTGTGTTGAGATTGTGAGCTTTACAGGGTATCGCGAG  
TGAATGACGACAGCTGCACAGCCTTGGCTCCTTTTCTGTGCCAGTGCAAACTAG

>GAHH01000056 Pseudonaja modesta LP-Pse-6 mRNA sequence  
ATGGGGCGATTCTCTTGGTGACCTCAGCTTGCTGGTCGGGGCTTTCTCCCTATGCGGAGCCACCAGCT  
CCTGTTGTCCCCAAGATTGGCTCCCCAGGAATGGGCTTTGTGTACAAGGTCTTCAATGACCACAAGAACTG  
GAACGACGCTGAGATGTTCTGTCAGGAAATTAAGCCAGGTTGCCACCTCGCTCCATCCATAGTAATGCA  
GACTCAGCTGACTTGGCCGAATACGTCTCCGACTATCTCATAGGTCATGACCACGTCTGGATCGGACTGC  
GGGATACAAAGAAGAAAGTACATCTGGGAGTGGACAGACAGATCTAGAAGTGAATTCCTGCTCTGGAGGAA  
AGATCAGCCCCGATCATTTATAAAAACAATGAATTCCTGTGTCGAGATTGTGAGCTTTACAGGGTATCGCGAG  
TGAATGACGACAGCTGCACAGCCTTGGCTCCTTTTCTGTGCCAGTGCAAACTAG

>GAHH01000057 Pseudonaja modesta LP-Pse-7 mRNA sequence  
ATGGGGCGATTCTCTTTGCGAGCCTCGGCTTGCTGGTCCTGGCTTTCTCCCTCAGTGAATTAGAGCCA  
ATCGCTATTGTCCCTTTGATTGGTTCTCCTACAATATGTCTTGCTACAAGCTCTTCTACTCTCCGATGTC  
CTGGGACCAAGCACAGAGGTTCTGTGTGGAACAGCAGGAAAACCTCCAACTCGCTCCATCAACGACGTG

GCAGAGTCGGTGAAGTTGTCCAACCTACATCTCCCAAAGATTGACATTCCCTTGATGTTTGGATGGGACTGA  
GGCTTTTCCAAGAGAAAAGGCATCTGGGAGTGGAGTGATGGCTCCAACCTCACTCACACATCCTGGAAAAGA  
AGGTGAACCCAAACACCTTTTCAACAAGGAATTCTGTGCTGTGCTGTGCTGAGCCGGAACACGGTATCTCCAA  
TGGAACGATAAGAAGTGACACACCTGCATCCATTTGTCTGCAAGTTCCAGCCCCGGAGTGAGGCAGGAG  
GCTAA

>GAHH01000058 Pseudonaja modesta LP-Pse-9 mRNA sequence  
ATGGGGCGATTCTCTTGGTGAGCCTGAGCTTGCTGGTTGTGGCTTTTTCCTTAAATGGAATTGGAGCTG  
ACCATCATTGCCCCGTGCGACTGGACCTCCCAGGGGGAGTTTGTCTACAAGTTGATCAGAGAATTGAAGAC  
CTGGGAAGACGCCGAGGCATCCTGCGTGCAACGTGAGAACAGCAGCCACCTGGCCTCCATCCACAACCCA  
GAAGAGTCCGGTTACATCCAACCGGTGATCTTCAGGAGTATTGTCTACAGTAATGTCTGGATTGGACTGA  
ATGATCCAGGGAAAAATCGCATGTGGGAATGGAGTGATGGCTCCAATGTGGATTATACGTCTGGAAACG  
ATCGGAACCCGGCAACGTGATRGTTGGGAGTACTGCGTTGAGGTGACCGCTATCACAGGTATTATAGA  
TGGCAAGCTGACAAGTGTGAATCCAAGAATTTTTCGTCTGCAAGATGTAG

>GAHH01000059 Pseudonaja modesta NP-Pse-1 mRNA sequence  
ATGGTCGGCCTCTCCCGTCTGGCGGGCGGCGGGCTGCTGCTGCTGGCCTGCTGCCTCTCGCCCTCGACG  
GGAAGCCGGCGCCGCTGCCTCAGGCGTGCCTGAGGCTCCGCGGGCGGGCTGATGGCATCGGTGACGGA  
GGAGCAGCAGCGGCTGCCGTTGGCGGCGGAGGAGTCCCCGATCCAGCGGCTGGGCGCAGCGGCTCCAAA  
GTGGCCAAAGTGGGCAGCGGTTGCTTCGGCAACCCGGCTCGACCAATCGGCACCTCGAGTGGCATGGGCT  
GCAATTGGCCAAACAAAACCGCCGAATCCGACACCTGCCGGATCCTAA

>GAHH01000060 Pseudonaja modesta NP-Pse-2 mRNA sequence  
ATGGGCGGCCTCTCCCGTCTGGCAGGCGGCGGGCTGCTGCTGCTGCTGCTGGCCTGCTGCCTGTGCGCC  
TCGACGGGAAGCCGGCGCCGCTGCCTCAGGCGCTGCCGAGGCTCCGGAGGGCAGCGTGATGGCGTCGCG  
CAGAGCTGACGGAGGAGCAGCAGCAGCTGCCGGCAGAGGTGTCTTCGGGTACGCGGCTGGGCGCAGC  
GGCTCTAAGATAGGGAACGTTGCTTCGGCGTCCGGCTCGACCGCATCAGCAACACGAGTGGCATGGGCT  
GCAGAAACCCCATCCAAAACCGCCGAAATCGACACCTGGCGGATCCTAA

>GAHH01000061 Pseudonaja modesta NP-Pse-3 mRNA sequence  
ATGGTCGGCCTCTCCCGTCTGGCGGGCGGCGGGCTGCTGCTGCTGCTGCTGGCCTGCTGCCTCTCGCCC  
TCGACGGGAAGCCGGCGCCGCTGCCTCAGGCGCTGCCGAGGCTCCGGCGGGCGGGCTGATGGCATCGGT  
GACGGAGGAGCAGCAGCGGCTGCCGTTGTCGGCGGAGGAGTCCCCGATCCAGCGGCTGGGCGCAGCGGC  
TCCAAAGTGGCCAAGCTGGGCAGCGGTTGCTTTGGCAACCGGCTCGACCACATCGGCACCCGAGTGGCA  
TGGGCTCGCAATTGGCCAAACAAAACCGCCGAATCCGACACCTGCCGGATCCTAA

>GAHH01000062 Pseudonaja modesta NP-Pse-5 mRNA sequence  
ATGGTCGGCCTCTCCCGTCTGGCGGGCGGCGGGCTGCTGCTGCTGCTGCTGCTGGCCTGCTGCCTCTCG  
CCCTCGACGGGAAGCCGGCGCCGCTGCCTCAGGCGCTGCCGAGGCTCCGGCGGGCAGCGTGATGGCATC  
GGTGACGGAGGAGCAGCAGCGGCTGCTGGTGGCGGCGGAGGAGTCCCCGATCCAGCGGCTGGGCGCAGC  
GGCTCCAAAGTGGCCAAAGCTGGGCAGCGGTTGCTTCGGCAACCGGCTCGACCACATCGGCACCTCGAGTG  
GCATGGGCTGCAATTGGCCAAACAAAACCGCCGAATCCGACACCTGCCGGATCCTAA

>GAHH01000063 Pseudonaja modesta NP-Pse-6 mRNA sequence  
ATGGTCGGCCTCTCCCGTCTGGCAAGGGCGGGCTGCTGCTGCTGCTGCTGGCCTGCTGCCTCTCGCCC  
TCAACGGGAAGCCGGCGCCGCTGCCTCAGGCGCTGCCGAGGCTCCGGAGGGCAGCGTGATGGCGTCGCG  
CAGGAGCTGACGGAGGAGCAGCAGCAGCTGCCGGCAGAGGTGTCTTCGGGTACGCGGCTGGGCGCAGC  
GGCTCTAAGATAGGGAACGTTGCTTCGGCGTCCGGCTCGACCGCATCAGCAACACGAGTGGCATGGGCT  
GCAATTGGCCAAACAAAACCGCCGAATCCGACACCTGCCGGATCCTAA

>GAHH01000064 Pseudonaja modesta NGF-Pse-1 mRNA sequence  
ATGGTGATAGCGTAATGTCCATGTTGTGCTACACTCTGATTATAGCATTTCGATTGGCATATGGGCAG  
CACCAAAATCTGAAGATATGTTCCCTCTGGGCTCCCTGCAACACTGACCTTTCTGACACCAGCTGTGC  
TCAAACCTCACAGGCTCTGAAACATCTCGAAATACAGATCAGCGCCATCCTGCTCTTAAAGAGGCAGAA  
GATCAAGAACTTGGATCAGCAGCCACATATTGTGGATCCCAAGCTTTTTCAGAAGAGGCGTTTCCAGT  
CACCTCGTGTCTGTTTCAGCACTCAGCCCCACCATTTGTCAAGAGATGAGCAAAAGTGTGGAGTTTCTTGA  
CAATGAAGACGCTCTTAACAGGAATTTCCGGGCCAAACGTGAAACTCATCTGTGCATAACCAAGGGGAA  
TATTTCTGTGTGTGACAGTATGATGTCTGGGTTGGCAACAAAACCAAAGCAATAGACATCAAAGACAAAC  
CGTTGACTGTGATGGTGCTAGGTTCAAAATCTTAATAACCATGTCTTCAAGCAGTACTTTTTCGAAACCAAGTG  
CAGAAATCCAAATCCAGTACCAAGTGGGTGACGGGGCATTGATTCCAGGCATTGGAATTCTTATTGCACC  
ACAACACAGACATATGTCAGGCATTAAACATGGAAGGCAATCAGGCATCTTGGCGCTTCATTGCGATTG  
ACGCTGCTGTGTGTGCTAATCAGTAGAAAACTGACAACTTCTGATGGGCCATTGATTGCTCCAATACT  
CACTTTC

>GAHH01000065 Pseudonaja modesta PLA2-Pse-2 mRNA sequence  
ATGCATCCTGCTACCTTCTGGTCTGTTGGGAGTTTGTGTCTCCCTCTTAGGAGCCGCCAGAATTCCTC  
CGCTGCCTCTCGACCTCATAGATTCTTCCAACCTGATTACATGTGCTAACCCTGGCAGTCGAAGTTGGTT  
GGATTATGCGCACTACGGTTGCTTCTGCGGCTCAGGAGGTAGCGGGACACCGGTAGACGACTTGGATAGG  
TGCTGCCAGGTTTCATGACAACTGTTATGGTGACGCCGAAAAAATTCTGTCATGTAATTACAGTTTCAGTA  
GCCCTACTGGAACCCCTATTATACAAATGTAATGAAGGCGAAATCACCTGCACAGATGACAAGGATGA  
GTGTAAAGCCTTTATTGTAAATTGCGACCCGACAGCAGCCATCTGTTTCGCCAGAGCCACTTACAAGGAC  
GAAACCTTCATGATCTCCACCAAGAAAAATAATATTTGCCAATGATATTGA

>GAHH01000066 Pseudonaja modesta PLA2-Pse-3 mRNA sequence  
ATGCATCCTGCTACCTTCTGGTCTGTTGGGAGTTTGTGTCTCCCTCTTAGGAGCCGCCAGAATTCCTC  
CGCTGCCTCTCGACCTCATAGATTCTTCCAACCTGATTACATGTGCTAACCCTGGCAGTCGAAGTTGGTT  
GGATTATGCGCACTACGGTTGCTTCTGCGGCTCAGGAGGTAGCGGGACACCGGTAGACGACTTGGATAGG  
TGCTGCCAGGTTTCATGACAACTGTTATGGTGACGCCGAAAAAATTCTGTCATGTAATTACAGTTTCAGTA  
GCGCCTACTGGAACCCCTATTATACAAATGTAATGAAGGCGAAATCACCTGCACAGATGACAAGGATGA  
GTGTAAAGCCTTTATTGTAAATTGCGACCCGACAGCAGCCATCTGTTTCGCCAGAGCCACTTACAAGGAC  
GAAACCTTCATGATCTCCACCAAGAAAAATAATATTTGCCAATGA

>GAHH01000067 Pseudonaja modesta PLA2-Pse-4 mRNA sequence  
ATGCATCCTGCTACCTTCTGGTCTGTTGGGAGTTTGTGTCTCCCTCTTAGGAGCCGCCAGAATTCCTC  
CGCTGCCTCTCGACCTCATAGATTCTTCCAACCTGATTACATGTGCTAACCCTGGCAGTCGAAGTTGGTT  
GGATTATGCGCACTACGGTTGCTTCTGCGGCTCAGGAGGTAGCGGGACACCGGTAGACGACTTGGATAGG  
TGCTGCCAGGTTTCATGACAACTGTTATGGTGACGCCGAAAAAATTCTGTCATGTAATTACAGTTTCAGTA  
GCGCCTACTGGAACCCCTATTATACAAATGTAATGAAGGCGAAATCACCTGCACAGATGACAAGGATGA  
GTGTAAAGCCTTTATTGTAAATTGCGACCCGACAGCAGCCATCTGTTTCGCCAGAGCCACTTACAAGGAC  
GAAACCTTCATGATCTCCACCAAGAAAAATAATATTTGCCAATGA

>GAHH01000068 Pseudonaja modesta PLA2-Pse-5 mRNA sequence  
ATGCATCCTGCTCACCTTCTGGTCTCTGTTGGGAGTTTGTGTCTCCCTCTTAGGAGCCGCCAGAATTCCTC  
CGCTGCCTCTCGACCTCATAGATTTCTCCAACCTGATTACATGTGCTAACCCTGGCAGTCGAAAGTTGGTT  
GGATTATGCGCACTACGGTTGCTTCTGCGGCTCAGGAGGTAGCGGGACACCGGTAGACGACTTGGATAGG  
TGCTGCCAGGTTTCATGACAACTGTTATGGTGGTACGCGGAAAAAATTCCTGCATGTAATTACCAAGTTTCAGTA  
GCGCCTTACTGGAACCCCTATTATACAAATGTAATGAAGGCGAAATCACCTGCACAGATGACAAGGATGA  
GTGTAAGCCCTTTATTTGTAATTGCGACCGCACAGCAGCCATCTGTTTCGCCAGAGCCACTTACAAGGAC  
GAAACCTTCATGATCTCCACCAAGAAAAATAATTTGCCAATGATATTGA

>GAHH01000069 Pseudonaja modesta PLA2-Pse-8 mRNA sequence  
ATGAATCCTGCTCACCTTCTGGTCTCTGTTGGGAGTTTGTGTCTCCCTCTTAGGAGCCGCCAGAATTCCTC  
CGCTGCCTCTCAGCCTCGTAGAATTCAGAAGCTTGATTAAATGTGCCAACCATACAGTCGAAATGTGTA  
CGATTATGTGGACTACGGTTGCTACTGTGGCAAAGGAGGTAGCGGGACACCGGTAGACGAGTTGGACAGG  
TGCTGCCAGGTCATGACTGCTAGTGAAGGAAATGACGAAAAAATTCCTGCATGTAATTACTGGTTTCAGTG  
GCGCCTTACTACAACTCCTATTATACAAATGTAATGAAGGCGAAATCACCTGCACAGATGACAACGATGA  
GTGTCAAGCCCTTTATTTGTAATTGCGACCGCACAGCAGCCATCTGTTTCGCCAGAGCCCTTATGACAAG  
GACAACCTGGAATATCAACACCGAGACAGATTGCTAA

>GAHH01000070 Pseudonaja modesta SVMP-Pse-2 mRNA sequence  
ATGGTTGCAGACAATTTAGTTTACAGGAAGTACAGCGGCAACATCACTGATGTAAGGATGAGAATATTTG  
AAATTCCTCAACTATGTAAATTTGTATTAYAAAGTTTCAATATTCATGTAATTGATGGCTTAGAAGT  
TTGGTCTGATGAAGATAAGATTCTGATCAATGGATCATCAGAACCCACTGTGAAATCCTTTGCAGCATGG  
AGACATTCAGATCTACTGTAAGCGCAAAAGGAATGACAATGCTCAGTTACTACGGGTATTCACTTCGATG  
AAGGAGTCTTAGGAGTAGCTTTCATAGGCGCATGTGCAATAATTTACATCTGTAGGAGTTATTCAGGA  
TAACAGCATCCAGGCAGTTTTAATTGCAGCTGT

>GAHH01000071 Pseudonaja modesta SVMP-Pse-4 mRNA sequence  
ATGGACAGCTTCCAGAGGAATGGACATCCATGCCAAAAACAACCAAGTTACTGCTACAATGGGAAATGCC  
CCATCATGACAAACCAATGTATCGATCTAGGGGGGCCAGGTGTAATGTGTCTCCAGATATATGTTTTAC  
ATTGAACCAAGTATAGCCAAAGTTGTGGCTTCTGCAGAATGGAAAATGGTACAAAGATTCCGCTGTGCAGCA  
AAGAATAAAATGTGTGGCAAGTTAATATGCGAAAAGGGAACTCGACATGCACCTGCTTTTCTGCAACAG  
ATGACCCAGATTATGGAATGGTTGAACCTGGAACAAAATGTGGAGATGGAATGGTGTGCATCAACAGGCA  
GTGTGTTGATGTTTCAGACAGCCTACTGA

>GAHH01000072 Pseudonaja modesta SVMP-Pse-3 mRNA sequence  
ATGTACAAGAATTATGACAGCAACAGACATGCTATAAAAAAGAAAAGTATATGAAACAATCAACCTTTTAA  
ACATGATGTACAGACCTTTGAATTTTCTCATTGCCTGATTGGCCTAGAAAATTTGGTCCAACCGAGATAA  
GATTAACATTGAACCAAGGTGGCTGCTGACTTTGAAATCTTGGAAAATGGAGAGAAAACAGTTTACTG  
CCACGCAAAAGGAATGATAATGCTCAGTTACTTACGCAAGATTGAGTTTAAACGGAACCTACTGTAGGACTTG  
CTTATGTGGGCAGCATCTGCAGTCCGAAGGAATCTGTAGCAGTTATAGAGGTTTATAGCAGAAGAACAGA  
TATAATTTGCATCTGAAATGGCCCATGAGTTGGGTCAATACTGGGCATTACTCATGACCACGCTTCCTGT  
AATTGCAGTGCTGAACATATGTATTATGTCTGCGATAATAAGTTTGAACCTCTCTCTGAGTTCAGCTCTT  
GTAGTATCCAGGAACATCAGAGGTATCTTCTTAGAGAGAGACCACAATGCATTCTCAACAGACCCCTTGAG  
CAGATATTTGTTACACCTCCAGTTTGTGGAAATTACTTAGTGGAGGTGGGAGAGAAGAAATGTGACTGTGGC  
TTTCCTGTGGATTGTCAAAGTGCCTGCTGCAACGCTACAACCTGTAAACTGCAACATGAGGCACAGTGTG  
ACTCTGAAGAGTGTGTGAGAAATGCAAACTTAAGAAAGCAGGAGCAGAATGCCGGGCAGCAAAGGATGA  
CTGTGACTTTGCTGAAATCTGCAGTGGCCAACTGCGCAGTGTCCCATGGACAGCTTCCAGAGGAATGGA  
CATCCATGCCAAAACAAACCAAGGTACTGCTACAATGGGAAATGCCCATCATGACAAACCAATGTATCG  
ATCTAGGGGGGCCAGGTGTAATGTGTCTCCAGATATATGTTTTACATTGAACCAGTATAGCCAAGGTTG  
TGGCTTCTGCAGAATGGAATGGTACAAAGATTCCGTGTGCAGCAAAGAAATAAAATGTGTGGCAAGTTA  
ATATGCGAAAATGGATGGTTCGAGTATAAGAATAATAAGAAATATTTTAGGGTCTCCACTGTGGGAATATG  
ATTCGGTCACTCTGGCTAAAACAG

>GAHH01000073 Pseudonaja modesta VEGF-Pse-3 mRNA sequence  
ATGAACCTTCTGCTCACTTGGATCCATTGCGGGTTGGCGGCGCTGCTTTATTTCCACAACGCCAAGGTGT  
TGCAGGCTGCTCCTGCCCAAGGAGGTGGAGAGAAGCAACAGATGAAGTTATCCCATTTATGACGGTCTT  
TGAGCGGAGTGCTGCAAGGCCATTGAGACCATGGTAGATATTTACCAGGAGTATCCTGATGAGGTGGAA  
TATCATGTTCAAACCATCCTGTGTGCTCCTGATGAAATGTGGAGGATTCTGTAATGACGAAGCGCTAGAAT  
TGATGCTCCACAGAGGTGTACAATGTACAGATGGAGATCATGAACTCAGACACTTTCAGAGCCAGCATAT  
ACAACTGATGAGCTTCCAGCAGCACAGTAAATGTCAATGCAGACAAAGAAACCAATGAGAATTAAACAA  
GAAAATCACTGTGAACCTTGCTCAGAAAGGAGAAAGCACTTGTACAAAAGATCCCTTGACCTGTAAT  
GTTCTGTCAAATTCAGACACTGACGTTGCAAGTCAAGCAGCTTGAGTTAAACGAGGCACACTTGCAGATG  
TGACAAACCAAGGCGGTGA

>GAHI00000000.1|GAHI01000000 TSA: Suta fasciata, transcriptome shotgun assembly, transcriptome shotgun assembly

>GAHI01000001 Suta fasciata 3FTx-Sut-45 mRNA sequence  
ATGAAAACCTCTGCTGCTGACCTTGGTGGTGGTGACAATCGTGTGCCTGGACTTAGGTGACAGCTTGATAT  
GCTACCTGGGACCTAATAACCTCAGACTTGTCACCTGGGGAGAAGCTATGCTTTACAAAGGCTTGGTG  
TGATGCTTGGTGTGGCATCAGAGGAAAGCGAATGGAATTTGGATGTGCTGCTACTTGCCTACAGGGAAG  
CCCGGTGTGGATATTACCTGTTGCTCAACAGACAAGTGCAACCCACATCCGAAACAGCAAAGTCGTTAA

>GAHI01000002 Suta fasciata 3FTx-Sut-50 mRNA sequence  
ATGAAAACCTCTGCTGCTGACCTTGGTGGTGGTGACAATCGTGTGCCTGGACTTAGGTGACAGCTTGATAT  
GCTACCTGGGACCTAATAACCTCAGACTTGTCACCTGGGGAGGAGCTATGCTTTACAAAGGCTTGGTG  
TGATGCTTGGTGTGGCATCAGAGGAAAGCGAATGGAATTTGGATGTGCTGCTACTTGCCTACAGGGAAG  
CCCGGTGTGGATATTACCTGTTGCTCAACAGACAAGTGCAACCCACATCCGAAACAGCAAAGTCGTTAA

>GAHI01000003 Suta fasciata 3FTx-Sut-59 mRNA sequence  
ATGAAAACCTCTGCTGCTGACCTTGGTGGTGGTGACAATCGTGTGCCTGGACTTAGGTGACAGCTTGATAT  
GCTACCTGGGACCTAATAACCTCAGACTTGTCACCTGGGGAGAAGCTATGCTTTACAAAGGCTTGGTG  
TGATGCTTGGTGTGGCATCAGAGGAAAGCGAATGGAATTTGGATGTGCTGCTACTTGCCTACAGGGAAG  
CCCGGTGTGGATATTACCTGTTGCTCAACAGACAAGTGCAACCCACATCCGAAACAGCAAAGTCGTTGA

>GAHI01000004 Suta fasciata 3FTx-Sut-134 mRNA sequence  
ATGAAAACCTCTGCTGCTGACCTTGGTGGTGGTGACAATCGTGTGCCTGGACTTAGGTGACAGCTTGATAT  
GCTACCTGGGACCTAATAACCTCAGACTTGTCACCTGGGGAGAAGCTATGCTTTACAAAGGCTTGGTG

TGATGCTTGGTGTGGCATCAGAGGAAAGCGAATGGAATTTGGATGTGCTGCTACTTGGCCCTACAGGGAAG  
CCCGGTGTGGATATTACCTGTTGCTCAACAGACAAGTGCAACCCACACTACCGAAACAGACAAAGTCGTT  
AA

>GAHI01000005 Suta fasciata ACN-Sut-1 mRNA sequence  
ATGCCCTCCTGCCAGCTGGCAAGATGCCTGCACCGTGGCCTTGGTGCCTCCAGCTGGTCCTTGCATCC  
TGTCTCCTAGCAGTCTTGCCTGGCCGGGCAAGCGAGCTGAAAGTGTCCACGCAGATGGGCTGGGTGCG  
TGGCCTTGAGCCTGCGGTTCTCGACGGTCAAGTCTCGGCCTTCTGGGTGTCCCTTTGCGGAGCCTCCC  
GTGGGCGAGGATGCGCTTCTGCGCCCTGAGCCCGTCAAGCCCTGGCAGCACGTCTTGACGCCACTTCTCT  
ACCAGCGCCCTGTTACCAGATGGTGGACACCAGCTACCCAGGCTTCCAGGGCACGGAGATGTGGAACCC  
CAACTGGGGCATGAGCGAGGACTGCCTCTACAACTCAACATCTGGGTGCCCTCCCCGCGCCCCAGAGACGTC  
CCCGTCTGCTGATCTACGAGGGGGCTTCTACAGTGGCGCTGCCTCCCTGGACGCTCTACGATGGTC  
GCTTCTTGACCTACACACAGAACGTATCCTGGTCTCCCTCAGCTACCGCGTGGGGGCTTGGGCTTTTT  
GGCCCTCCCGGGCAGCCGGAGGCGCCGGGGAACATGGGCCTGCTGGACCAGCGCTTGGCCCTGCAGTGG  
ATCCAGAACAACATCAATTATTTTGGGGGCAATCCCAACGCGGTACCATCTTTGGGGAGAGTGCCTGGG  
CCGCTCGGTGGGCATGCACCTGCTTTCACCCACAGCCGCGGCCTTTCAGCGGGCCATCCTGCAGAG  
CGGCGGCCCAACGCACTCGTGGGCGCCGTCACGCTGCGGAAAGCCGCGCGGGCGGCCCTTCTGGGA  
AAGCAGCTGGGCTGCCAGTTCAACAACGATTCCGAGCTGGTCAAGTTCGCTTGCCTCGAAAACCCGCGAGG  
AGCTGATCGACGAGGAGTGGTCCGCTCCTGCCTACAAGAGCATTTTCCGCTTCCCCTTCGTCCCGGTCAT  
TGACGGGAACCTTTTCCGGACACCCCGAGGCCATGCTGAGCTCGGGCAACTTCAAGGAGACCCAGGTG  
TTGCTGGGCGTGGTGAAGGACGAGGGTCTCTACTTTTGATCTACGGGCTGCCCGGCTTCAGCAAGGACA  
ACGAGAGCCTCATCAACCAGGCCGACTTCTTGAAGGGGTGCGGATGAGCGTGCCTCACGCCAACGACAT  
CGCCCTCGAGGCGCTGCTGCTGACGATCACTGCTGCGAGGACAGGACAACGGGGAGAAGAACAGGGAG  
GCCATGACGACATCTGCGGGGACCAACAACGTCATCTGCCCGGTCTGCGAGTTCGCCAATGACTACGCCA  
AGCGCAACAACAAGGTGTACGCCTACCTCTTTGACCACCGGGCCTCCAACCTGCTCTGGCCTCCCTGGAT  
GGGGGTCCCGCCAGCGCTAGGAGTCAAGATCTGCTTTTGGATTGCCCTCAACGACAGCTGAACTACAG  
CCCCAAGAGAAGGAGCTGAGCGCAGGATGATGCGCTACTGGGTCAACTTCGCGCGGACGGGGAACCCCA  
TCGACTCTACCGAGAAGAACGGGGCCTGGCCACCTACACCGCCTCCCGGCGCAATATGTCCAGCTCAA  
CACCCAGCGCTGGCCACCCACCCAGTCTGCGGGCCAGATCTGCGCCTTCTGGAACCAATTCCCTCCCC  
AACTGCTGAACGCCACAG

>GAHI01000006 Suta fasciata CRiSP-Sut-19 mRNA sequence  
ATGATTGCCTTCATTGTCTTGCTAAGTCTTGCTGCAGTGTCTGCAACAGTCTTCTGGAAGTGTGATTTTG  
CTTCTGAGTCAAGTAACCAAAAAGATTACCAAAAGGAGATTGTTGACAAGCACAATGCTTTAAGGAGATC  
AGTGAAACCAACTGCTAGGAAATGTTACAAATGAAATGGAATTTCTCGTGTCTCAAATGCAAAACGT  
TGGGCAGATAGATGTACTTTTCTCAGAGTCCACCACATACAGAATGTGGGAAAACCTCCGTGTGTGGTG  
AAAAATATATTATGTCAGTCAACCTTCTTCATGGAGTGTCAATGTTTCAAGGCTTGGTATGATGAAGTCAA  
AAAAATTTGTCTATGCTAGGAGCAAACTCCACAGGTTCTGTATTATGGCCATTATACCCAGATAGTTTGG  
TACAAAAGTCGCTTTCTTGGTGTGCTTCTGCCAAATGTTCTTCAACCGAATACTTCTACGTTTGTCAAT  
ACTGCCCAGCAGGGAACATGGAAGGTTCAATTGCTACTCCATATAAAATCAGGGCCAACTTGTGGGGACTG  
TCTTTCGGCTTGTGTCAACGGACTATGCACAAATCCCTGTGAACATAACGATGACTTTCAGAACTGCAAA  
GATTTAGCGAAAAGAAAGTAAATGCCAGACTGAATGGATCAAGTCAAAATGCCTTGCTACTTGTCTTGCC  
ACACTGAAATAATATAG

>GAHI01000007 Suta fasciata CRiSP-Sut-27 mRNA sequence  
ATGATTGCCTTCATTGTCTTGCTCAGTCTTGCTGCAGTGTGCAACAGTCTTCTGGAAGTGTGATTTTG  
CTTCTGAGTCAAGTAACCAAAAAGATTACCGAAAGGAGATTGTTGACAAGCACAATGCTTTAAGGAGATC  
AGTGAAACCAACTGCTAGGAAATGTTACAAATGAAATGGAATTTCTCGTGTCTCAAATGCAAAACGT  
TGGGCAGATAGATGTACTTTTGTCTCAGAGTCCACCACATACAAGAATGTGGGAAAACCTCCGTGTGGTG  
AAAAATATATTATGTCAGTCAACCTTTCATGGAGTGTCAATGTTTCAAGGCTTGGTATGATGAAGTCAA  
AAAAATTTGTCTATGCTAGGAGCAAACTCCACAGGTTCTGTATTATGGCCATTATACCCAGGTTAGTTTGG  
TACAAAAGTCACCTTCTTGGTGTGCTTCTGCCAAATGTTCTCCAACCAATACCTCTACGTTTGTCAAT  
ACTGCCCAGCAGGGAACATGGAAGGTTCAATTGCTACTCCATATAAAATCAGGGCCAACTTGTGGGGACTG  
TCTTTCGGCTTGTGTCAAGGGCTATGCACAAATCCCTGCAACATAATGATGACTTCTCGAACTGCAAA  
GATTTAGCGAAAAGAAAGTAAATGCCAGACTGAATGGATCAAGTCAAAATGCCTTGCTACTTGTCTTGCC  
ACAATAAAATAATATAG

>GAHI01000008 Suta fasciata fX-Sut-7 mRNA sequence  
ATGGCTCCTCAGCTACTTCTCTGTCTGATCCTCACTTTTCTATGGAGTCTCCAGAGGCTGAAAGTAATG  
TATTCTTAAAAAGCAAAAGTGGCAAAATAGATTTTGCAGAAACCAAAACGATCTAATCACTGTTTGAAGG  
ATTTAAAGCTGGAACATGAAAGGGAATGCATTGAGGAGAAATGTTCAAAGAAGAAGCCAGGGAGGTA  
TTTGAAGATAACGAAAAAATGAGACCTTCTGGAATGTTTATGTAGATGGGGATCAGTGTTCATCAAAAC  
CTTGTCTATTATCGCGGACATGCAAAAGATGGCATTGGTAGCTATACCTGTACCTGCTTGCCTAACTATGA  
CGGGAACCACTGTGAAAAAGTCTTATACGAGTCTGCGAGAGTGGACAATGGTAACTGTTGGCACTTCTGC  
AAAAGCTTCAAACGAAAGTTCAAGTGTTCATGTGCTGAAAGTTACCGTTTGGGAGATGATGGGCGCTCTT  
GTGTTCTGTAAGGTGACTTTTCTATGTGGTAGAAATATAAAAGCAAGGAACAAGAGGGAAGCAAGTCTGCC  
TGACTTTGTGCAGTCCCAAGGCAACTTTGCTGAAAAATCTGATAATCCAAGCCCTGATATCAGAAAT  
GTTAATGGAATGGATTGCAAACTGGGTGAATGTCCATGGCAGGCAGTCTGCTAGATGAAAAAGAAAAAG  
TGTTTTGTGGAGGAACAATTCAGTCCCATC

>GAHI01000009 Suta fasciata KP-Sut-1 mRNA sequence  
ATGCTCTTCTGGAGGTCTTCTTCTCCTGCTGGGACTCCTCACCTCTGGSCAGAGATGASSSYCATCTCTG  
GCCAGGACCTCCAAAGATATTGATCTTCTGCTAACCTTGAGCCATGTAGAGCAAGAAATCACTCGCTT  
TTACTACAACTCGGATTCAAAACATGTTGAAGAGTTTATTTATGGTGGATGCCACGGCAATGCCAACAT  
TTTGAGACCAAGATAAATGTATTACACCTGTGTTGAAAAGCCTGGGGTGTGTCCCAAACCCGGTCCAG  
ACGTTGTCACTATTGTCTCGTGAGATGTGAAAGTGAATGCTTGGGAAGGAGAAGTGTCTGCAG  
TTACGCATGCCTGCGTGATTGCATGGAGCCTGTCTAA

>GAHI01000010 Suta fasciata KP-Sut-2 mRNA sequence  
ATGTCTTCTGGAGGTCTTCTTCTCCTGCTGGGACTCCTCACCTCTGGGAGGGGCTGACCCTCGTCTCCA  
GCACGGACCGTCCAGACTTCTGTGAAGTGCCTGATGATCCGGACCATGTAAGGCGAGCTTCGAAGCCTT  
CTACTACAACGAGATCAACATAAATGCCTAGAGTTTATTTATGGGGATGCGACGGGAATGCTAACAAAT  
TTTAAGACCATAGAGGAATGCGAACACACCTGTGCTGCATGA

>GAHI01000011 Suta fasciata KP-Sut-4 mRNA sequence  
ATGCCACAAGTCAGATGTGCCAGGAATTCATTTTTTGGAGGTTGCAAGGCAATGCCAACAACTTCGTCT  
CCAAACAGGACTGCTTCCAGAGCTGTATCAGAGGAGGGGCTGCAGAGGCAACAGTGGTACCTAGCAGGCC  
AGCCACTGAAGTGGCTACAGCTAAGATGTGACATCTCCAGAGGCCCTACGAAAACAGGCTTGGCTTCAGA  
GAATTCGTGTCTGCGCCCCGGGTGGTAGGTCCCTGCGGGCCTCCTTCTCCGTTGGTACTTCGACCTAG  
AGAGCCGATGTGCAAGATGTTCTGTCTATGGGGCTGTCTGGCAACAAGAACAACTATCTCTCGAAGA  
GCATGCTGGAGCCAGTGCACAGGTGATGGAGATAACTGAAGAGCCAGGAGATGCAGGCGCCAGCCT

CCCCCTCCCCTCCGAACCCCTTCAGCTTCTCCACCAGAGGTGTGGTCCTTGCTGTCTTCTGGCCATCCTGG  
TGACTATCCTGCTGGGCTCGATMGGGGGTTTTCTTTGTTAA

>GAHI01000012 Suta fasciata LP-Sut-3 mRNA sequence  
ATGGCGCAGTTTCATCGTTGTGAGCGTCAGCTTGCTGATCGTGGCCCTCTCCTTAACGGGTAACGTAGAGG  
CTGATCACCACCTTGTTCTTACGCGGTTGGGCGGTCTACTAATGAGTTTGTCTACATGGTCTACAACAG  
ATCCGTGACCTGGAACAATGCCGAGAGATTCTGCCTGCAGCAAGAGACAACTGCCACCTCGCCTCCATC  
CATAGCAAGCCAGAGGCGAGCCCTTCATAGTCAGGCTGGTCTACCAAGGGCCAGCGCCGGGTCCAGTGTCT  
GGATCGGGTTGAACGATCCAGAGAAAAGACGCGCCTGGCAATGGAGTGATGGCTCCAGCTTAAAGTACAG  
ATCCTGGATGCCAGGAGAGCCCAACAACCATGCAAAACAACGAGTATTGTGTTGTGCTGCAGCCTGGTCA  
CGTTATGTGCGATGGAAACGATCAGGACTGTGGGTCCAGCCATAATTTGTCTGCAAGTCCAGCCAAAGC  
CGAGAGTAACACCGTCAATGTTCCAAAGAGGAAGTAATGAAGTCTTATTCCTATTGAAACCTCTGCTCT  
GCACCTTGTGCTTTCATGGATGCTTTT

>GAHI01000013 Suta fasciata NP-Sut-1 mRNA sequence  
ATGGTCGGCCTCTCACGTCTGGCGGGCGGCGGGCTGCTGCCGCTGCTGCTGCTGGCCCTGCTGCCTCTCG  
CCCTCGACGGGAAGCCGGCGCGCGGTGCTCAGGCGCTGCCCGAGGCTCCGGCGGGCGGCACGACGGCGTG  
GCGGCGGGACCTGACGGAGCAGCAGCGCGCGCGGCGGAGGAGTCTCGGGTCCCGCGGCGGGCGCAGC  
GGCTCCAAGGCGGGCCAGGACGCCCCGACGCGCGCGGAAAGGCAAAGGGGCGGCGGTGTCGGCGGCCGCT  
CGCGGTCTCGGAGATTTGCGCCGCGACGTCAAGGAGTCCGCCCCACCTCGGGCCGGTTGGCGTATCC  
CGAATACCCCGCAGGAGGAGGAGGAGGAGGCGGCGGCGGACAGTCCGCGGACACCTGGGGCCGGTTG  
GCGTACCCCGAGTACCCCGCAGGAGGCGGAGGCGGCGGCGGCGCTGGCGTCTGCGAAGAGGCCGCTA  
AGAAAGGGCGGACCTTCAAGAGCTGCTTCGGCCTCCCGCTCGACCGCATCGGCACCAAGAGCGGCTGGG  
CTGCTGA

>GAHI01000014 Suta fasciata NP-Sut-10 mRNA sequence  
ATGGTCGGCCTCTCACGTCTGGCGGGCGGCGGGCTGCTGCTGCTGCTGGCCCTGCTGCCTCTCGCCCTCG  
ACGGGAAGCCGGCGCGGTGCTCAGGCGCTGCCCGAGGCTCCGGCGGGCGGCATGATGGCGTGGCGGCG  
GGACCTGACGGAGCAGCAGAAAGCCGACCGCATGGCGGAGTCCCGGGTCCCGCGGCGAGCGCAGCGAC  
TCCAAGACGGCCACGAAAGGGGACGGTGTCTCGGCTCCCGATCGACCGTATCGGCAGCGTAAGCGGCA  
TGGGCTGCGGAGGGGTCCCGAAGCCGACGCTGGCGGATCCTAA

>GAHI01000015 Suta fasciata NP-Sut-13 mRNA sequence  
ATGGTCGGCCTCTCACGTCTGGCGGGCGGCGGGCTGCTGCCGCTGCTGCTGCTGGCCCTGCTGCCTCTCG  
CCCTCGACGGGAAGCCGGCGCGGTGCTCAGGCGCTGCCCGAGGCTCCGGCGGGCGGCACGATGGGGTG  
GCGGCCGCTGTGACGGAGCAGCAGAAAGCAGCCGACGCGCTGGCGGAGTCCCGGGTCCCGCGGCGGAG  
CGCAGCGACTCCAAGACGGCCACGAAAGGGAACGGCTGCTTCGGCCACCGGATCGACAACATCGGCAGCG  
TAAGCGCATGGGCTGCGGAGGCAAGCCGAAGCCTGGCGGATCCTAA

>GAHI01000016 Suta fasciata NP-Sut-14 mRNA sequence  
ATGGTCGGCCTCTCACGTCTGGCGGGCGGCGGGCTGCTGCTGCTGCTGGCCCTGCTGCCTCTCGCCCTCG  
ACGGGAAGCCGGCGCGGTGCTCAGGCGCTGCCCGAGGCTCCGGCGGGCGGCACGATGCTGACGGAGCA  
GCAGAAAGCAGCCGACGCGCTGGCGGAGTCCCGGGTCCCGCGGCGGAGCGCAGCGACTCCAAGACGGCC  
ACGAAAGGGAACGGTGTCTTCGGCGTCCGGATCGACCGTATCGGCAGCGTAAGCGGCATGGGCTGCGGAG  
GCAAGCCGAAGCCGACGCTGCGGATCCTAA

>GAHI01000017 Suta fasciata NP-Sut-19 mRNA sequence  
ATGGTCGGCCTCTCACGTCTGGCGGGCGGCGGGCTGCTGCCGCTGCTGCTGGCCCTGCTGCCTCTCGCCC  
TCGACGGGAAGCCGGCGCGGTGCTCAGGCGCTGCCCGAGGCTCCGGCGGGCGGCACGATGCTGACGGCA  
GCAGCAGAAGCAGCCGACGCGCTGGCGGAGTCCCGGGTCCCGCGGCGGAGCGCAGCGACTCCAAGACGGCC  
GCCACGAAAGGGAACGGTGTCTTCGGCCACCGGATCGACAACATCGGCAGCGTAAGCGGCATGGGCTGCG  
GAGGCAAGCCGAAGCCGAAGCCTGGCGGATCCTAA

>GAHI01000018 Suta fasciata NP-Sut-24 mRNA sequence  
ATGGTCGGCCTCTCACGTCTGGCGGGCGGCGGGCTGCTGCTGCTGCTGGCCCTGCTGCCTCTCGCCCTCG  
ACGGGAAGCCGGCGCGGTGCTCAGGCGCTGCCCGAGGCTCCGGCGGGCGGCACGATGCTGACGGAGCA  
GCAGAAAGCAGCCGACGCGCTGGCGGAGTCCCGGGTCCCGCGGCGGAGCGCAGCGACTCCAAGACGGCC  
ACGAAAGGGAACGGTGTCTTCGGCGTCCGGATCGACCGTATCGGCAGCGTAAGCGGCATGGGCTGCGGAG  
GCAAGCCGAAGCCG

>GAHI01000021 Suta fasciata PLA2-Sut-19  
ATGTATCCTGCTACCTTCTGGTTCTGTTGGCAGTTTGTGTCTCCCTCTT  
AGGAGCCGCCGGCATTCTCCGACGCTCTCAACCTCTATCAGTTCAAGG  
GCATGATTGAATGTGGCAACCGTGGCAATCGAGATGCATGGGATTATAAT  
AACTACGGTTGCTACTGCGGCCAGGGAGGTAGCGGGACACAGTAGACGA  
CTTGATAGGTGCTGCAAAGTACATGACGACTGCTATGGTGAAGCCGAAA  
ACAGCCTGAATTGCTCCCCCTACTGGACATTGTAT  
ACTTGGGACTGTACTGAAAATGTACCCACCTGCAAAATCAAAATCGGGGTG  
TCCACGTTCTGTGTGAATGTGACGCCGTAGCAGCCAAAGTGTCTTGCCA  
AAGCCGATTACAACGACGCGAACAAGGGTATCAAAGGCACTGCACGTTGC  
CAATGA

>GAHI01000022 Suta fasciata PLA2-Sut-22  
ATGTATCCTGCTACCTTCTGGTTCTGTTGGCAGTTTGTGTCTCCCTCTT  
AGGAGCCGCCGGCATTCTCCGACGCTCTCAACCTCTATCAGTTCAAGG  
GCATGATTGAATGTGGCAACCGTGGCAATCGAGATGCATGGGATTATAAT  
AACTACGGTTGCTACTGCGGCCAGGGAGGTAGCGGGACACAGTAGACGA  
CTTGATAGGTGCTGCAAAGTACATGACGACTGCTATGGTGAAGCCGAAA  
ACAGCCTGAATTGCTCCCCCTACTGGACATTGTAT  
ACTTGGGACTGTACTGAAAATGTACCCACCTGCAAAATCAAAATCGGGGTG  
TCCACGTTCTGTGTGAATGTGACGCCGTAGCAGCCAAAGTGTCTTGCCA  
AAGCCAATTACAACGACGCGAACAAGGGTATCAAAGGCACTGCACGTTGC  
CAATGA

>GAHI01000023 Suta fasciata PLA2-Sut-20  
ATGTATCCTGCTCAACTTCTGGTCTGTTGGCAGTTTGTGTCTCCCTCTT  
AGGAGCCGCCGGCATTCTCCGACGCTCTCAACCTCTACACTTCGGCT  
TCATGATTCAATGTGCCAACCGTCGCGAGTCGAGGTGCATTGGATTATAAT  
AACTACGGTTGCTACTGCGGCTCGGGAGGTAGCGGGACACCGGTAGACGA  
CTTGATAGGTGCTGCAAAGTACATGACGACTGCTATGATAAAGCTACCA  
AAAGCTACAGTTGCTCCCCCTACTGGACATTGTAT  
ACTTGGGACTGTATTGCAAAATGTACCCACCTGCAATTCAAAAACGAGATG  
TCAACGTTTGTGTGTGCTTGTGACGCCGTAGCAGCCAAGTGTCTTGCCA

AAGCCAATTACAACGACGCGAACAAGGGTATCAAAGGCACTGCACGTTGC  
CAATGA

>GAHI01000024 Suta fasciata PLA2-Sut-23  
ATGTATCCTGCTCAACTTCTGGTCCTGTTGGCAGTTTGTGTCTCCCTCTT  
AGGAGCCACCAAGGATTCTCTCCGAGCCTCTCAACCTCCTACACTTCGGCT  
TCATGATTCAATGTGCCAACCGTCGCGAGTCGAGGTGCATTGGATTATAAT  
AACTACGGTTGCTACTGCGGCTCGGGAGGTAGCGGGACACCGGTAGACGA  
CTTGGATAGGTGCTGCAAAAAGACATGACGACTGCTATGATAAAGCTACCA  
AAAGCTACAGTTGCTCCCCCTACTGGACATTGTAT  
ACTTGGGACTGTATTGAAAATGTACCCACCTGCAATTCAAAAACGAGATG  
TCAACGTTTTTGTGTGTGCTTGTGACGCCGTAGCAGCCAAGTGCTTTGCCA  
AAGCCAATTACAACGACGCGAACAAGGGTATCAAAGGCACTGCACGTTGC  
CAATGA

>GAHI01000025 Suta fasciata PLA2-Sut-14  
ATGTATCTTGCTCACCTTTTGGTCCTGTTGGCAGTTTGTGTCTCCCTCTT  
AGGAGCCTCCGACAATTCTCCGAGCCTCTCAACCTCATACAATTTCGGCT  
TCATGATTAAATGTGGCAACAAACGCAGACAACTCTTTTTCGTTATCTG  
GACTACGGTTGCTACTGCGGCAAAAGGAGGTGCGGGACACCGGTAGACGA  
CTTGGATATGTGCTGCAAAATACATGACGACTGCTATGCTAAAGCTACCA  
AAAGCTACAGTTGCTCCCCCTACTGGACATTGTAT  
AGTTGGAATGTTACGCAAGTGGACCTACTGCAGTTCAAAAACGAGATG  
TCAACGTTTTTGTGTGTGCTTGTGACGCCGTAGCAGCTCCAGATGCTTTGCCA  
GGGCCATTACAACCCCGCAACTATAATATCAACACCAAGAAACGTTGC  
CAATGA

>GAHI01000026 Suta fasciata PLA2-Sut-25  
ATGTATCCTGCTCACTTTCTTGTCTCTGTTGGCAGTTTGTGTCTCCCTCTT  
AGGAGCCGCCAGGATTCTCTCCGCGCCTCTCAACCTCATACAATTTCGGCG  
ACATGATTGAATGTGCCAACCAAGCACTCGAAGTGCATTGGATTATATG  
GATTACGGTTGCTACTGCGGCAAAAGGAGATAGCGGGACCCCGGTAGACGA  
CTTGGATAGGTGCTGCAAAATACATGACGACTGCTATGGTGAAAGCCGAAA  
ACAGCCTGAATTGCTCCCCCTATTGGGCGTGGTAT  
ACTTGGCAATGTACTGAAAATGTACCCACCTGCGATTCAAAACACGGGGTG  
TAAAAGTTCTGTGTGTGATTGTGACGCCGTAGCAGCCAAGTGCTTTGCCG  
AAGCCCAATACAACAAGGAGAACTACAATATCGACACCGACACACGTTGC  
CAATGA

>GAHI01000027 Suta fasciata PLA2-Sut-1  
ATGTATCCTGCTCACCTTCTGGTCCTGTTGGCAGTTTGTGTCTCCCTCCT  
AGGAGCCACCGGCATTCTCTCCGCGCCTCTCAACCTCCTACAATTTGACA  
CCATGATTGAATGTGCCAACATCGCAGTCGAAGTTCTAACGATTATATG  
GACTACGGTTGCTACTGCGGCGAAGGAGGTAGCGGGACACCGGTAGACGA  
CTTGGATAGGTGCTGCAAAATACATGACGACTGCTATGGTGAAAGCCGAAA  
AGCACGAATGCGACCCCTGTGCTGAAGTAT  
AGGTGGCGATGTGGCCGACAGGGACCTTACTGCCGTTCAAAAACGCAGTG  
TCAACGTTTTTGTGTGTCTTTGTGACCTCTGCGAGCCAAGTGCAATTGCC  
AAGAACTTACAACAGGGAGAACTACAATATCGACACCAAGAAACGTTGC  
CAATGA

>GAHI01000028 Suta fasciata PLA2-Sut-36  
ATGTATCCTGCTCACCTTCTGGTCCTGTTGGCAGTTTGTGTCTCCCTCTT  
AGGAGCCGCCAGGATTCTCCACGGCCTCTCAACCTTGTACAATTCGACA  
ACATTATTCAATGTGCCAACTATGGCAGTCGACCTTCTTGGCATTATCTG  
GACTATGGTTGCTACTGCGGCTCAGGAGGTAGCGGGACACCGGTAGACGA  
CTTGGATAGGTGCTGCAAAATACATGACGACTGCTATGCTGAAGCCGACA  
AAAAAGGATGCTTCCCCAAGTTCTCGGTGTAT  
AGTTGGAATGTGGCAGCGATGGACCCACCTGCAGTGACAACATGAGTG  
TAAAGCCTTTATTGTAAATTGTGACCGCACAGCAGCCAAGTGCTTTGCCG  
GAACCCCTTCAACCAGGAGAACTGGAGTATCGACACCGAGACACGTTGC  
CAATGA

>GAHI01000029 Suta fasciata PLA2-Sut-16  
ATGTATCCTGCTCAGCTTCTGGTCCTGTTGGGAGTTTGTGTCTCCCTCTT  
AGGAGCCGCCAGCATTCTCTCCGAGCCTCTCAACCTCTATCAGTTCAAGA  
ACATGATTCAATGTGCTAACCATGGCAGGAGACCTACTTGGCATTACATG  
GACTATGGTTGCTACTGCGGTCCAGGAGGTAGCGGGACACCGGTAGATGA  
GTTGGATAGGTGCTGCAAAATACATGACGACTGCTATGCTAAAGCTGAAA  
CATCCGAATGCAACCCCAAGTTGCAGATTTAT  
ATTTGGCAATGTGGCAGCGATGGACCAAGTGCAGGCAATTGAGAAACGGG  
GTGTAAAAGTTCTGTGTGTGATGTGACGCCGTAGCAGCCAAGTGCTTTG  
CCGAAGCCCAATTACAACGACGCGAACTGGGATATCAAAACCGACACACCT  
TGTC AATGA

>GAHI01000030 Suta fasciata PLA2-Sut-8  
ATGTATCCTGCTCACCTTCTGGTCCTGTTGGCAGTTTGTGTCTCCCTCTT  
AGGAGCCTCTGACATTCTCTCAGCGCTCTTTCGACTTCGAACAATTGAGCA  
ACATGATTCAATGTACCATCCCTGCGAAGAATCTTGTCTCGGTTATATG  
GACTACGGTTGCTACTGCGGTCCAGGAGGTAGCGGGACACCGGTAGACGA  
CTTGGATAGGTGCTGCCAGACTCATGACAACCTGCTATGCTGAAGCTGGAA  
AACTTCTGCTGATGTAAGGCCATGCTGAGTGAGTCCGACAACGACAGCTAT  
TCATACAGCTGTATTGAAGGCCAACTCACCTGCAACGATGACAACGATGA  
GTGTAAAAGCCTTTATTGTAAATTGTGACCGCACAGCAGTCAACTGCTTCG  
CCAGAGCCCTTACAACGACTCGAATACGATATCGGCACCACTGAACAT  
TGCA AATGA

>GAHI01000019 Suta fasciata SVMP-Sut-51 mRNA sequence  
ATGATCCAAGCTCTCTTGGTAACTATATGCTTCACGTTTTTCCATATCAAGGGAGCTCTATCATCCTGG  
AATCCGGGAATGTTAATGATTATGAAGTAGTGATCCACAAAAAGTGCTGCATTGCCCAAAGGAGGAGT  
TCAGAAATCCTCAGCCAGAGACCAAGTATGAAGATACAATGCAATATGAATTTACGTTGAATGGAGAGCCA  
TCGCTCTCTTCACTTAGAAAGAAATAAAGGACTTTTTTTCAGAAGATTACACTGAACTCATTATGCCCTG  
ATGGCAGAGAAAATTACAACAAGCCCTCCAGTTCCAGGATCACTGCTATTATCATGGCTACATTCAGAATGA  
AGCTGATTCAAGTGCAGTCATCAGTGATGCGACGGCTTGAAAGGACATTTCAAGCATCGAGGGGAGACA  
TACTTTATTGAGCCCTTGAAGCTTTCGACAGTGAAATCCCATGCAATCTACAAAGATGAAAATGTAGAAA  
AAGAGGATGAGATCCCCAAAATCTGTGGGTAACCCAGACTACTTCGGAGTCAGATGAGCCCATTGAAAA  
GATCGCTCAATTAACTAATACCTGCTGAAGAAGACAAGTACTTGCAGGTCAAAAAATACATTGAGTTTTAC  
GTGTTGTGGACAACGAAATGTACAAGAATTACAGCAGCAGGAAACCTGCTATAAAAAACAGAGTATATG

AAATGGTCAACCATTTAAACGTGATGTACAGACCTTTGAATTTTTTCATTGCACTGATTGGCCTAGAGAT  
TTGGAGCAACAAAGATCAGATTAAAGGTTGAACCACAGGTGAATGTCACTGTGAAATCATTTGGAGAAATGG  
AGAGAGAAAAAATTGCTGCCACGCAAAAGGAATGATAATGCTCAGTTACTCACGGGCATTGACTTCAACG  
GAGATACTATAGGATATGCTTACGTCGGCTCCCTCTGCCTTCCGACGCAATCTGTAGCAATTATTTCAGAA  
TTATCACAACAAAGCAGCATGGTGGCATCCGTAATGGCCCATGAGTTGGGCCATAATCTTGGCATTTCAT  
CATGACAAGCCTTCTCTGTAATTGCAATCTTGACGATGCATTATGGCTGCAAGAACAAAGTGATGAACCTC  
ATTCTGAGTTCAGCTCTTGTAGTGTCCAGGATCATCAGAGGTATCTTCTTAGAGAAAGACCACAATGCAT  
TCTCAACAAAACCTTGGAGCACGGATATTGTTGCACCCCAAGTTTGTGGAAATTACTTTGTGGAGCGGGGA  
GAAGAAATGTGACTGTGGCTCTCCTCAGGATTGTCAAAGTGCTGTGCAATGTACAACCTTGTAAACTGC  
TACATGAGGCACAGTGTGACTCCGGAGAGTGTGTGAGAAATGCAATTTAAGAAAGCAGGAGTAGAATG  
CCGGGAGCAAAAGGATGACTGTGACTCGCCTGAAAGCTGCACTGGCCAATCTGCTAAGTGTCCACGGAC  
AGTTTTCCAGAGGAATGGACATCCATGCCAAAGCAACAGGGTTACTGCTACATGGGAAATGCCCCCTCA  
TGACAAACCAAGTGCATTGCTCTCGGGGGACAGGTGTAATGTGTCTCCAGATGGATGTTTACGTTGAA  
CAAGAAATGGCCAAGGTTGTAGCTTCTCGAGAATGGAATAATGGTAAAAAGATTCCATGTGCAAGCAAGGAT  
GTAAGTGTGCGATGTTATACTGCGAA

>GAHI01000020 Suta fasciata VEGF-Sut-1 mRNA sequence  
ATGAACCTTTCTGCTCACTTGGATCCATTGCGGATTGGCGGCGCTGCTTTATTTCCACAACGCCAAGGTGT  
TGCAGGCTGCTCCTGCCCAAGAGGATGCAGCGAAGCAACCAGAAGAAGTTATCCCATTTATGACGGTCTT  
TGAGCCGAGTGCCTGAGGCCCATTTAGACCATGGTAGATGTTTACCAGGAGTATCCTGATGAGGTGGAA  
TACCTGTTCAAACCATCTGTGTTCTCCTGATGAAATGTGGAGGATTCTGTAATGACGAAGCGCTAGAAT  
GCGTGCCCATAGAGGTGCACAATATCAGCATGGAGATCATGAACTCAGACACTTGCAGAGCCAGCATAT  
ACAAACGATGAGCTTCCAGCAGCACAGTAAATGTCAATGCAGACCAAGAAACCAATAAGAATTAAACAA  
GAAAAAATGCAGAATTACCTCCCATCTTCTACTATTACCTGCCTGTAGGTGAACAGCCTATAATGATGC  
CTTCTGATGGTTCCAGTGGGAATACTCAAAATAA

>GAHJ00000000.1|GAHJ01000000 TSA: *Vermicella annulata*, transcriptome shotgun assembly, transcriptome  
shotgun assembly

>GAHJ01000001 *Vermicella annulata* 3FTx-Ver-100 mRNA sequence  
ATGAAAACCTCTGCTGCTGACCTTGGTGGTGGTGACAATCGTGTGCCTGGACTTAGGATACACCCATAAAT  
GTTACAAATCTCACGCTCCTGGGGTTATGAGGTTTGTAAAGAACACGAGACCAAAATGCATTTGGATATAA  
CATTTGTGCATTTCAGAAATCATGCGATAGTCGTCAGGGGATGTGGTACTTCTTGCCCTGAAGGAAATCGT  
CCTGTGTGTTGCAGTACAGACATGTGCAACAAGTAG

>GAHJ01000002 *Vermicella annulata* 3FTx-Ver-70 mRNA sequence  
ATGAAAACCTCTGCTGCTGACCTTGGTGGTGGTGACAATCGTGTGCCTGGACTTAGGATACACCCATAAAT  
GTTACAAATCTCACGCTCCTGGGGTTATGAGGTTTGTAAAGAACACGAGACCAAAATGCATTTGGATATAA  
CATTTGTGTATTTCAGAAATCGTGCATAGTCGTCAGGGGATGTGGTGTCTTCTTGCCCTACAAAAAATCTT  
CCTGTGTGTTGCAGTACAGACATGTGCAACAAGTAG

>GAHJ01000003 *Vermicella annulata* 3FTx-Ver-49 mRNA sequence  
ATGAAAACCTCTGCTGCTGACCTTGGTGGTGGTGACAATCGTGTGCCTGGACTTAGGATACACCCATAAAT  
GTTACAAATCTCACGCTCCTGGGGTTATGAGGTTTGTAAAGAACACGAGACCAAAATGCATTTGGATATAA  
CATTTGTGTATTTCAGAAATCGTGCATAGTCGTCAGGGGATGTGGTGTCTTCTTGCCCTACAGGAAATCTT  
CCTGTGTGTTGCAGTACAGACATGTGCAACAAGTAG

>GAHJ01000004 *Vermicella annulata* 3FTx-Ver-47 mRNA sequence  
ATGAAAACCTCTGCTGCTGACCTTGGTGGTGGTGACAATCGTGTGCCTGGACTTAGGATACACCCATAAAT  
GTTACAAACCTTAAGACTCTGAGGTTATGAGGTTTGTAAAGAACACGAGACCAAAATGCATTTGGATATAA  
CATTTGTCTATTTCAGAAATCATGCGGTAGTCGTCAGGGGATGTGGTGTCTTCTTGCCCTACAGAAATCTT  
CCTGTGTGTTGCAGTACAGACATGTGCAACAAGTAG

>GAHJ01000005 *Vermicella annulata* 3FTx-Ver-124 mRNA sequence  
ATGAAAACCTCTGCTGCTGACCTTGGTGGTGGTGACAATGTGTGCCTGGACTTAGGATACACCCTTAAAT  
GTACAAATCTCACCTTGTATAGGTTATGAGGTTTGTAAAGAACACGAGACCAATTTGCTTTGAATATAG  
AGCATGTATATTTCAGAAATGAAGTGTGTACATCAGGGGATGTAGTGCTTCTTGCCCTGAGAGATATAAG  
CATGTGTGTTGCAGTACAGACCTGTGCAACAAGTAG

>GAHJ01000006 *Vermicella annulata* 3FTx-Ver-128 mRNA sequence  
ATGAAAACCTCTGCTGCTGACCTTGGTGGTGGTGACAATCGTGTGCCTGGACTTAGGATACACCCCTAAGAT  
GTAAAAAACTTATAGGATTTCTGTGTTTGTAAAGAACACGAGACCAATTTGCTATCGATATCCTACTTA  
TATATTTAAAGTAAACTGATAATCCTGAAGGGATGTAGTGCTTCTTGCCCTGACAAAACCTAGTGTTCG  
TGTGTCAGTACAGATATGTGCAACACTACAAGTGGCTAA

>GAHJ01000007 *Vermicella annulata* 3FTx-Ver-130 mRNA sequence  
ATGAAAACCTCTGCTGCTGACCTTGGTGGTGGTGACAATGTGTGCCTGGACTTAGGATACACCCATAAAT  
GTCACATAACTGGGAGTCCTAATGATTATGTGGTTTGTAAAGAACACGAGACCAATTTGCTTTCAAAAAAC  
TGTTTTCTCCATTTAGAGATCGTATGTGTAGTCCTTAGGGGATGTAGTACTCCTTGCCCTGAAGGAGATAAT  
GCTATGTGTTGCAGTACAGATATGTGCAACAAGTAG

>GAHJ01000008 *Vermicella annulata* 3FTx-Ver-3 mRNA sequence  
ATGAAAACCTCTGCTGCTGACCTTGGTGGTGGTGACAATCGTGTGCCTGGACTTAGGATACACAGGTGAT  
GCTTGAAAACACCTGAAATTAATCTGAGCCTTGTCCACCTGGGCAGAACCTATGCTATACAAAGACTTG  
GTGTGATCGTTTTTGTACAATGAGAGGAAAGGTAATCGAACTGGGATGTGTGCTACTTGCCTCCAGCA  
GAGCCAAGAAAGGATATTACCTGTTGCTCAACAGACAATTGCAACACAGTTCCGTAA

>GAHJ01000009 *Vermicella annulata* 3FTx-Ver-5 mRNA sequence  
ATGAAAACCTCTGCTGCTGACCTTGGTGGTGGTGACAATCGTGTGCCTGGACTTAGGTGACAGCTTGATAT  
GCTACGTGGGATATAATATCCCTCAGATTTGTCCAACCTGGGGAGGTGGTATGCTTTACAAAGACTTGGTG  
TGATGCTCACTGTGGCGAAAGAGGAAACGAGTCGAATTTGGGATGTGTGCTACTTGCCTATAGTGAAG  
CCCGGTATTGATATTACCTGTTGCTCAACAAACAATTGCAACCCATTTCCGTTCTGGCCACGTCCTAGAC  
CAGGTCGTTGA

>GAHJ01000010 *Vermicella annulata* 3FTx-Ver-10 mRNA sequence  
ATGAAAACCTCTGCTGCTGACCTTGGTGGTGGTGACAATCGTGTGCCTGGACTTGGTGACAGCTTGGTAT  
GCTACTCTGGGATATAATACCCCTCGGACTTGTCCACCTGGGCAGAACCTATGCTATACAAAGACTTGGTG  
TGATGGTCACTGTGGCAGCAGAGGAAAGCGAATTGTTTTGGGATGTGTGCTACTTGCCTATAGTGAAG

CCCGGTGTCGATATTTCTGTGCTCAACAGACAAGTGCAACCCACATCCGAAACAGGAACGTCGTTGA

>GAHJ01000011 Vermicella annulata 3FTx-Ver-24 mRNA sequence  
ATGAAAACTCTGCTGCTGACCTTGGTGGTGGTGACAATCGTGTGCCTGGACTTAGGATACACCATGACAT  
GTTACAACCAACAGTCATCGGAAGCTCAAACCACTACAACCTTGTCCAGGTGGGGTGAGCTCTTGCTATAA  
AAAGACTTGGAGAGATCACCGTGGAACTATAATTGAAAGGGGATGTGGTTGCCCTGACGTGAAGCCCCGGT  
GTTGGACGTACATGTTGCCAAGCAGACACATGCAACAATTAG

>GAHJ01000012 Vermicella annulata 3FTx-Ver-32 mRNA sequence  
ATGAAAACTCTGCTGCTGACCTTGGTGGTGGTGACAATCGTGTGCCTGGACTTAGGATACACCATGACAT  
GTTACAACCAACAGTCATCGGAAGCTCAAACCACTACAACCTTGTCCAGGTGGGGTGAGCTCTTGCTATAA  
AAAGACTTGGAGAGATCACCGTGGAACTATAATTGAAAGGGGATGTGGTTGCCCTGACGTGAAGCCCCGGT  
GTTGGACGTACATGTTGCCAAGCAGACACATGCAACAATTAG

>GAHJ01000013 Vermicella annulata 3FTx-Ver-30 mRNA sequence  
ATGAAAACTCTGCTGCTGACCTTGGTGGTGGTGACAATCGTGTGCCTGGACTTAGGATACACCATGACAT  
GTTACAACCAACAGTCATCGGAAGCTCAAACCACTACAACCTTGTCCAGGTGGGGTGAGCTCTTGCTATAA  
AAAGACTTGGAGAGATCACCGTGGAACTATAATTGAAAGGGGATGTGGTTGCCCTGACGTGAAGCCCCGGT  
GTTGGACGTACATGTTGCCAAGCAGACAAATGCAACAATTAG

>GAHJ01000014 Vermicella annulata 3FTx-Ver-27 mRNA sequence  
ATGAAAACTCTGCTGCTGACCTTGGTGGTGGTGACAATCGTGTGCCTGGACTTAGGATACACCATGACAT  
GTTACAACCAACAGTCATCGGAAGCTCAAACCACTACAACCTTGTCCAGGTGGGGTGAGCTCTTGCTATAA  
AAAGACTTGGAGAGATCACCGTGGAACTATAATTGAAAGGGGATGTGGTTGCCCTGACGTGAAGCCTGGT  
GTTGGACGTACATGTTGCCAAGCAGACACATGCAACAATTAG

>GAHJ01000015 Vermicella annulata 3FTx-Ver-28 mRNA sequence  
ATGAAAACTCTGCTGCTGACCTTGGTGGTGGTGACAATCGTGTGCCTGGACTTAGGATACACCATGACAT  
GTTACAACCAACAGTCATCGGAAGCTCAAACCACTACAACCTTGTCCAGGTGGGGTGAGCTCTTGCTATAA  
AAAGACTTGGAGAGATCACCGTGGAACTATAATTGAAAGGGGATGTGGTTGCCCTGACGTGAAGCCCCGGT  
GTTGGACGTACATGTTGCCAAGCAGACACATGCAACAATTAG

>GAHJ01000016 Vermicella annulata 3FTx-Ver-7 mRNA sequence  
ATGAAAACTCTGCTGCTGACCTTGGTGGTGGTGACAATCGTGTGCCTGGACTTAGGTGACAGCGTGATAT  
GTACAACCATCAGTCATCGGAAGCTCAAACCACTACAAGTTGTCCAGGTGGGGTGAGCTCTTGCTATAA  
TGAAGGTTTTTKTAGCCAGAGAGGACCGCGAGTCGAAATGGGATGTACTGCTACTTGCCCTACAGCGAAG  
CCCGGTGTGAAGATTACCTGTTGCTCAACAGACAAGTGCAACCCATTTCCGACACGGCCACGTCCTACAC  
CAGGTCATTGA

>GAHJ01000017 Vermicella annulata CRiSP-Ver-3 mRNA sequence  
ATGATTGCCTTCATTGTCTTGCTAAGTCTTGCTGCAGTGTGCAACAGTCTTCTGGAAGTGTGATTTTG  
CTTCTGAGTCAAGTAACAAAAGAGAAATCCAAAAGCAGATTGTTGACAAGCACAATGCTTTAAGGAGATC  
AGTGAACCAACTGCTAGGAACATGTTACAATGGAATGGAATTCTCGTGTGCTCAAAATGCACAACGT  
TGGGCGCATAGTTGTTCTTTGATCAGTCAGTCCACCACATACAAGAACTGTGGGAAAACCTCAGTTGTGGTG  
AAAATATATTATGTCAAGTCAACCTTTTGCATGGAGTAGAATAATTGAGGCTTGGTATGATGAAAACAA  
AGAATTCTGCTATGGCATTGGAGCAAAGCCACCAGGTTCTGTTATTGTCCATTATACCCAGATAGTTTGG  
TACAAAAGTCACTTCTTGGTTGTGCTTCTGCCAGATGTTCTTCATCCAAATACCTCTATGTTTGTCAAT  
ACTGCCCAGCAGGGAACATCAGAGGTTCAACTGCTACTCCATATAAATCAGGGCCACCTTGTGGGGACTG  
TCCTTCGGCTTGTGTCAACGGACTTTGCACAAATCCTTGCAAAATATAAGGATGACTTATCGAACTGCAAA  
TCTTTAGCGAGAAACAGTAGATGCCAGACTGAATGGATCAAGTCAAAATGCCCTGCTTCTTGCTTCTGCC  
ACACTGAAATAATATAG

>GAHJ01000018 Vermicella annulata KP-Ver-2 mRNA sequence  
ATGTCTTCTGGAGGTCTTCTTCTTCTGCTGGGACTCCTCACCTCTGGGAGGGGCTGACCCCCGTCTCCA  
GCAAGGACCGTCCACACTTCTGTCTATCTGCCATGACACCGGACCATGTAAGGCATTTTCCAAGCCTT  
CTACTACAACCCAGTTCAACATCAATGCCGAGAGTTTATTTATGGTGGATGCGGAGGGAATCCTAACAAAT  
TTTAAGACCATAGATGAATGCAAAACAAACCTGTGCTGCATGA

>GAHJ01000019 Vermicella annulata KP-Ver-3 mRNA sequence  
ATGTCTTCTGGAGGTCTTCTTCTTCTGCTGGGACTCCTCACCTCTGGGAGGGGCTGACCCCCGTCTCCA  
GCAAGGACCGTCCACACTTCTGTCTATCTGCCATGACACCGGACCATGTAAGGCATTTTCCAAGCCTT  
CTACTACAACCCAGTTCAACATCAATGCCGAGAGTTTATTTATGGTGGATGCGGAGGGAATGCTAACAAAT  
TTTAAGACCATAGATGAATGCAAAACAAACCTGTGTTGCATGA

>GAHJ01000020 Vermicella annulata KP-Ver-5 mRNA sequence  
ATGTCTTCTGGAGGTCTTCTTCTTCTGCTGGGACTCCTCACCTCTGGGAGGGGCTGACCCCCGTCTCCA  
GCAAGAACCGTCCACATCTGTCTATCTGCCATGACACCGGACCATGTAAGGCATTTTCCAAGCCTT  
CTACTACAACCCAGTTCAACATCAATGCCGAGAGTTTATTTATGGTGGATGCGGAGGGAATGCTAACAAAT  
TTTAAGACCATAGATGAATGCAAAACAAACCTGTGTTGTATGA

>GAHJ01000021 Vermicella annulata KP-Ver-13 mRNA sequence  
ATGTCTTCTGGAGGTCTTCTTCTTCTGCTGGGACTCCTCACCTCTGGGAGGGGCTGACCCCCGTCTCCA  
GCAAGGACCGTCCACACTTCTGTCTATCTGCCATGACACCGGACCATGTAACGCAACATCCAAGCCTT  
CTACTACAACCCAGTTCAACATCAATGCCGAGAGTTTATTTATGGTGGATGCGGAGGGAATCCTAACAAAT  
TTTAAGACCATAGATGAATGCAAAACAAACCTGTGCTGCATGA

>GAHJ01000022 Vermicella annulata LP-Ver-1 mRNA sequence  
ATGGGGCGATTCTCTTTGCGAGCCTCGGCTTGCTGGTGCCTGCTTTCTCCCTAAGTGAATTTGGAGCCA  
ATCGCTATTGTCCCTTCGATTGGTTCTCTTACAATATGTCTTGCTACAAGCTTTCTACTATCCGATGAC  
CTGGGACCAAGCACAGAGGTTCTGTGTGGAACAGCAGGAAAACTCCCATCTCGCCTCCATCCATGACGTG  
GGAGAGTTCGGTGAAGTTGTCCAACATCATCTCCAAAGATTGAAATTTTGTGACGTTTGGATGGGACTGA  
GGCTTTCAAAGAGAAAAGGCATCTGGGAGTGGAGTGTGGCTCCAACCTCACTACACATCCTGGGAAGA  
AGGTGAACCCCAACCTTTTCAACAAGGAATTCTGTGCTGTGCTGTGCTGAGCCGGAACACGGTATCTCCAA  
TGGAACGATAAAGAGCTGCATGCACTGGCATAAAATTTGTCTGCAAGTTCCGGCCCCGGAGTGAGGCAGGCA  
GCTAA

>GAHJ01000023 Vermicella annulata SVMP-Ver-17 mRNA sequence  
GATCACTGCTATTATCATGGCTACATTCAGAATGAAGCTGATTCAAGTGCACTCATCAGTGCAACG  
GCTTGAAAGGACATTTCAAGTATCGAGGGGAGACATACTTTATTGAGCCCTTGGAGCTTTCCGACAGTGA  
ATCCCATGCAATCTACAAAGATGAAATGTAGAAAAAGAGGATGAGATCCCCAAAATCTGTGGGGTAACC  
CAGACTACTTTGGAGTCAGATGAGCCCATCGAAAAGATCTCTCAATTAATACTCTCTCAAGAAGACA

ATTACTTGCAGGTCAAAAATACATTGAGTTTTACGTGGTTGTGGACAACAAATGTACAAGAAATACAA  
CAGCAACAGACATGCTATAAAAAAGAAGAGTATATGAAATGGTCAACAGTTTAAATGTGATATACAGACCT  
TTGAATTTTTTCATTGCACTGATTGGCCTAGAAATTTGGACCAACCAAGATAAGATTAAGTTTGAACCAA  
AGATGAATGTCACTTTGAAATCATTTGAAAAATGGAGAGAGAAAAATTTGCTGCCACGCAAGACGAATGA  
TAATGCTCAGTTACTCACTAGCAGTAATTTTCATAGAACCTGCTATAGGAGTTGCTTTACCCGGCTCCCTC  
TGCAGTCCAAAGCAATCTGTAGCAGTTATTCGGGATCATAGCAACAGAGCAATCATGGTGGCATCTACAA  
TGGCCCATGAGTTGGGTCATAATCTGGGCATTTCATCATGACAGAGGTTTCTGTAATTGCCATGCTGGACC  
ATGCATTATGACTAAGAGAATAAGTAATGAACCTCATTCTGAGTTCAGCAATTGTAGTGTCCAGGAACAT  
CAGAGGTATCTTCTTACTTACAGACCACAATGCATTCTCAACAAACCCTTGAGCACAGATATTGTTGCAC  
CTCCAATTTGTGGAATTAACTTTGTGGAGGTGGGAGAAGAATGTGACTGTGGCTCTCCTCAGGATTGTCA  
AAATGCCTGCTGCAACGCCAAAACTTGCAAACTGCAATACGACTGTGACTCCGGAGAGTGTTGTGACCAA  
TGCAAAATTTAAGAAAGCAGGAGCAGAATGCCGGGCAGCAAAGGATGACTGTGACTTGCTGAAATCTGCA  
CTGGCCAATCTGCTGAGTGTCCCATGGACAGCTTCAGAGGAATGGACATCCATGCCAAAAACAACCAAGG  
TTACTGCTACAATGGGACATGCCCCCTTATGACAAAACCAAGTGTATAGCTCTAATGGGGCCAGGTGTAAAT  
GTGTCCCAGATGAATGTTTTACGTTGAAACAGAATGACCCAGATTGTGGCTTCTGCAGAATAGAAAAATG  
GTAAAAAGATTCCATGTGCAGAAAAGGATAAAATGTGTGGCATGTTAGTATGCGAAAAGGGAAACGCGAC  
ATGCATCTGCTTTACTACAACAGATGATCCAGATTATGCAATGGTTGAACCTGGAACAAAATGTGGAGAT  
GGAATGGTGTGCAGCAACAGGCAGTGTGTTGATGTGCAGACAGCCTACTGA

>GAHJ01000024 *Vermicella annulata* WP-Ver-1 mRNA sequence  
ATGTTAAACTGCTAAAGAGGATAGAGATGATGAAATTAGCCAAGCKGATRAAWGAGAAAATCGGGTCCT  
GCCAGATGTGGACAGGCCCATCCCACCTCTGGGTATTTGCAGAACCATGTGTCAAACAGATTCAAACCTG  
TCCAAATATCAAGAAGTGCTGCAAAAATGGCTGCGGGTTCATGACTTGTTCACGCCCAAAGCCTGA
